# Supplementary material for: Signal denoising through topographic modularity of neural circuits
Source: eLife journal article supplement (doi:10.7554/elife.77009), 2023-01-26
Supplement: supp [file fig4_b.pdf › figure4/plots/fig4_b.pdf]

1

1

10

[illegible]

100% of the respondents (n = 100) were female, and 100% (n = 100) were aged 18 years or older. The majority of the respondents (n = 80, 80%) were aged 18-24 years, and 20% (n = 20) were aged 25 years or older. The majority of the respondents (n = 80, 80%) were from the United States, and 20% (n = 20) were from other countries. The majority of the respondents (n = 80, 80%) were students, and 20% (n = 20) were not students. The majority of the respondents (n = 80, 80%) were from the United States, and 20% (n = 20) were from other countries. The majority of the respondents (n = 80, 80%) were students, and 20% (n = 20) were not students.

[illegible]

1. **Introduction**

100

100
