# Supplementary material for: Signal denoising through topographic modularity of neural circuits
Source: eLife journal article supplement (doi:10.7554/elife.77009), 2023-01-26
Supplement: supp [file fig4_c_left.pdf › figure4/plots/fig4_c_left.pdf]

**THE UNIVERSITY OF CHICAGO**

1. **Introduction**  
 2. **Background**  
 3. **Methodology**  
 4. **Results**  
 5. **Discussion**  
 6. **Conclusion**  
 7. **Acknowledgments**  
 8. **References**  
 9. **Appendix**  
 10. **Index**  
 11. **Table of Contents**  
 12. **Table of Figures**  
 13. **Table of Tables**  
 14. **Table of Equations**  
 15. **Table of Symbols**  
 16. **Table of Abbreviations**  
 17. **Table of Acronyms**  
 18. **Table of Units**  
 19. **Table of Symbols**  
 20. **Table of Abbreviations**  
 21. **Table of Acronyms**  
 22. **Table of Units**  
 23. **Table of Symbols**  
 24. **Table of Abbreviations**  
 25. **Table of Acronyms**  
 26. **Table of Units**  
 27. **Table of Symbols**  
 28. **Table of Abbreviations**  
 29. **Table of Acronyms**  
 30. **Table of Units**  
 31. **Table of Symbols**  
 32. **Table of Abbreviations**  
 33. **Table of Acronyms**  
 34. **Table of Units**  
 35. **Table of Symbols**  
 36. **Table of Abbreviations**  
 37. **Table of Acronyms**  
 38. **Table of Units**  
 39. **Table of Symbols**  
 40. **Table of Abbreviations**  
 41. **Table of Acronyms**  
 42. **Table of Units**  
 43. **Table of Symbols**  
 44. **Table of Abbreviations**  
 45. **Table of Acronyms**  
 46. **Table of Units**  
 47. **Table of Symbols**  
 48. **Table of Abbreviations**  
 49. **Table of Acronyms**  
 50. **Table of Units**  
 51. **Table of Symbols**  
 52. **Table of Abbreviations**  
 53. **Table of Acronyms**  
 54. **Table of Units**  
 55. **Table of Symbols**  
 56. **Table of Abbreviations**  
 57. **Table of Acronyms**  
 58. **Table of Units**  
 59. **Table of Symbols**  
 60. **Table of Abbreviations**  
 61. **Table of Acronyms**  
 62. **Table of Units**  
 63. **Table of Symbols**  
 64. **Table of Abbreviations**  
 65. **Table of Acronyms**  
 66. **Table of Units**  
 67. **Table of Symbols**  
 68. **Table of Abbreviations**  
 69. **Table of Acronyms**  
 70. **Table of Units**  
 71. **Table of Symbols**  
 72. **Table of Abbreviations**  
 73. **Table of Acronyms**  
 74. **Table of Units**  
 75. **Table of Symbols**  
 76. **Table of Abbreviations**  
 77. **Table of Acronyms**  
 78. **Table of Units**  
 79. **Table of Symbols**  
 80. **Table of Abbreviations**  
 81. **Table of Acronyms**  
 82. **Table of Units**  
 83. **Table of Symbols**  
 84. **Table of Abbreviations**  
 85. **Table of Acronyms**  
 86. **Table of Units**  
 87. **Table of Symbols**  
 88. **Table of Abbreviations**  
 89. **Table of Acronyms**  
 90. **Table of Units**  
 91. **Table of Symbols**  
 92. **Table of Abbreviations**  
 93. **Table of Acronyms**  
 94. **Table of Units**  
 95. **Table of Symbols**  
 96. **Table of Abbreviations**  
 97. **Table of Acronyms**  
 98. **Table of Units**  
 99. **Table of Symbols**  
 100. **Table of Abbreviations**  
 101. **Table of Acronyms**  
 102. **Table of Units**  
 103. **Table of Symbols**  
 104. **Table of Abbreviations**  
 105. **Table of Acronyms**  
 106. **Table of Units**  
 107. **Table of Symbols**  
 108. **Table of Abbreviations**  
 109. **Table of Acronyms**  
 110. **Table of Units**  
 111. **Table of Symbols**  
 112. **Table of Abbreviations**  
 113. **Table of Acronyms**  
 114. **Table of Units**  
 115. **Table of Symbols**  
 116. **Table of Abbreviations**  
 117. **Table of Acronyms**  
 118. **Table of Units**  
 119. **Table of Symbols**  
 120. **Table of Abbreviations**  
 121. **Table of Acronyms**  
 122. **Table of Units**  
 123. **Table of Symbols**  
 124. **Table of Abbreviations**  
 125. **Table of Acronyms**  
 126. **Table of Units**  
 127. **Table of Symbols**  
 128. **Table of Abbreviations**  
 129. **Table of Acronyms**  
 130. **Table of Units**  
 131. **Table of Symbols**  
 132. **Table of Abbreviations**  
 133. **Table of Acronyms**  
 134. **Table of Units**  
 135. **Table of Symbols**  
 136. **Table of Abbreviations**  
 137. **Table of Acronyms**  
 138. **Table of Units**  
 139. **Table of Symbols**  
 140. **Table of Abbreviations**  
 141. **Table of Acronyms**  
 142. **Table of Units**  
 143. **Table of Symbols**  
 144. **Table of Abbreviations**  
 145. **Table of Acronyms**  
 146. **Table of Units**  
 147. **Table of Symbols**  
 148. **Table of Abbreviations**  
 149. **Table of Acronyms**  
 150. **Table of Units**  
 151. **Table of Symbols**  
 152. **Table of Abbreviations**  
 153. **Table of Acronyms**  
 154. **Table of Units**  
 155. **Table of Symbols**  
 156. **Table of Abbreviations**  
 157. **Table of Acronyms**  
 158. **Table of Units**  
 159. **Table of Symbols**  
 160. **Table of Abbreviations**  
 161. **Table of Acronyms**  
 162. **Table of Units**  
 163. **Table of Symbols**  
 164. **Table of Abbreviations**  
 165. **Table of Acronyms**  
 166. **Table of Units**  
 167. **Table of Symbols**  
 168. **Table of Abbreviations**  
 169. **Table of Acronyms**  
 170. **Table of Units**  
 171. **Table of Symbols**  
 172. **Table of Abbreviations**  
 173. **Table of Acronyms**  
 174. **Table of Units**  
 175. **Table of Symbols**  
 176. **Table of Abbreviations**  
 177. **Table of Acronyms**  
 178. **Table of Units**  
 179. **Table of Symbols**  
 180. **Table of Abbreviations**  
 181. **Table of Acronyms**  
 182. **Table of Units**  
 183. **Table of Symbols**  
 184. **Table of Abbreviations**  
 185. **Table of Acronyms**  
 186. **Table of Units**  
 187. **Table of Symbols**  
 188. **Table of Abbreviations**  
 189. **Table of Acronyms**  
 190. **Table of Units**  
 191. **Table of Symbols**  
 192. **Table of Abbreviations**  
 193. **Table of Acronyms**  
 194. **Table of Units**  
 195. **Table of Symbols**  
 196. **Table of Abbreviations**  
 197. **Table of Acronyms**  
 198. **Table of Units**  
 199. **Table of Symbols**  
 200. **Table of Abbreviations**  
 201. **Table of Acronyms**  
 202. **Table of Units**  
 203. **Table of Symbols**  
 204. **Table of Abbreviations**  
 205. **Table of Acronyms**  
 206. **Table of Units**  
 207. **Table of Symbols**  
 208. **Table of Abbreviations**  
 209. **Table of Acronyms**  
 210. **Table of Units**  
 211. **Table of Symbols**  
 212. **Table of Abbreviations**  
 213. **Table of Acronyms**  
 214. **Table of Units**  
 215. **Table of Symbols**  
 216. **Table of Abbreviations**  
 217. **Table of Acronyms**  
 218. **Table of Units**  
 219. **Table of Symbols**  
 220. **Table of Abbreviations**  
 221. **Table of Acronyms**  
 222. **Table of Units**  
 223. **Table of Symbols**

| Age Group | Percentage |
|-----------|------------|
| 18-24     | 15%        |
| 25-34     | 25%        |
| 35-44     | 35%        |
| 45-54     | 45%        |
| 55-64     | 55%        |
| 65-74     | 65%        |
| 75-84     | 75%        |
| 85+       | 85%        |

1. **Introduction**  
 2. **Background**  
 3. **Methodology**  
 4. **Results**  
 5. **Discussion**  
 6. **Conclusion**  
 7. **References**  
 8. **Appendix**  
 9. **Index**  
 10. **Table of Contents**  
 11. **Abstract**  
 12. **Summary**  
 13. **Key Words**  
 14. **Keywords**  
 15. **Subject Headings**  
 16. **Classification**  
 17. **Indexing**  
 18. **References**  
 19. **Appendix**  
 20. **Index**  
 21. **Table of Contents**  
 22. **Abstract**  
 23. **Summary**  
 24. **Key Words**  
 25. **Keywords**  
 26. **Subject Headings**  
 27. **Classification**  
 28. **Indexing**  
 29. **References**  
 30. **Appendix**  
 31. **Index**  
 32. **Table of Contents**  
 33. **Abstract**  
 34. **Summary**  
 35. **Key Words**  
 36. **Keywords**  
 37. **Subject Headings**  
 38. **Classification**  
 39. **Indexing**  
 40. **References**  
 41. **Appendix**  
 42. **Index**  
 43. **Table of Contents**  
 44. **Abstract**  
 45. **Summary**  
 46. **Key Words**  
 47. **Keywords**  
 48. **Subject Headings**  
 49. **Classification**  
 50. **Indexing**  
 51. **References**  
 52. **Appendix**  
 53. **Index**  
 54. **Table of Contents**  
 55. **Abstract**  
 56. **Summary**  
 57. **Key Words**  
 58. **Keywords**  
 59. **Subject Headings**  
 60. **Classification**  
 61. **Indexing**  
 62. **References**  
 63. **Appendix**  
 64. **Index**  
 65. **Table of Contents**  
 66. **Abstract**  
 67. **Summary**  
 68. **Key Words**  
 69. **Keywords**  
 70. **Subject Headings**  
 71. **Classification**  
 72. **Indexing**  
 73. **References**  
 74. **Appendix**  
 75. **Index**  
 76. **Table of Contents**  
 77. **Abstract**  
 78. **Summary**  
 79. **Key Words**  
 80. **Keywords**  
 81. **Subject Headings**  
 82. **Classification**  
 83. **Indexing**  
 84. **References**  
 85. **Appendix**  
 86. **Index**  
 87. **Table of Contents**  
 88. **Abstract**  
 89. **Summary**  
 90. **Key Words**  
 91. **Keywords**  
 92. **Subject Headings**  
 93. **Classification**  
 94. **Indexing**  
 95. **References**  
 96. **Appendix**  
 97. **Index**  
 98. **Table of Contents**  
 99. **Abstract**  
 100. **Summary**  
 101. **Key Words**  
 102. **Keywords**  
 103. **Subject Headings**  
 104. **Classification**  
 105. **Indexing**  
 106. **References**  
 107. **Appendix**  
 108. **Index**  
 109. **Table of Contents**  
 110. **Abstract**  
 111. **Summary**  
 112. **Key Words**  
 113. **Keywords**  
 114. **Subject Headings**  
 115. **Classification**  
 116. **Indexing**  
 117. **References**  
 118. **Appendix**  
 119. **Index**  
 120. **Table of Contents**  
 121. **Abstract**  
 122. **Summary**  
 123. **Key Words**  
 124. **Keywords**  
 125. **Subject Headings**  
 126. **Classification**  
 127. **Indexing**  
 128. **References**  
 129. **Appendix**  
 130. **Index**  
 131. **Table of Contents**  
 132. **Abstract**  
 133. **Summary**  
 134. **Key Words**  
 135. **Keywords**  
 136. **Subject Headings**  
 137. **Classification**  
 138. **Indexing**  
 139. **References**  
 140. **Appendix**  
 141. **Index**  
 142. **Table of Contents**  
 143. **Abstract**  
 144. **Summary**  
 145. **Key Words**  
 146. **Keywords**  
 147. **Subject Headings**  
 148. **Classification**  
 149. **Indexing**  
 150. **References**  
 151. **Appendix**  
 152. **Index**  
 153. **Table of Contents**  
 154. **Abstract**  
 155. **Summary**  
 156. **Key Words**  
 157. **Keywords**  
 158. **Subject Headings**  
 159. **Classification**  
 160. **Indexing**  
 161. **References**  
 162. **Appendix**  
 163. **Index**  
 164. **Table of Contents**  
 165. **Abstract**  
 166. **Summary**  
 167. **Key Words**  
 168. **Keywords**  
 169. **Subject Headings**  
 170. **Classification**  
 171. **Indexing**  
 172. **References**  
 173. **Appendix**  
 174. **Index**  
 175. **Table of Contents**  
 176. **Abstract**  
 177. **Summary**  
 178. **Key Words**  
 179. **Keywords**  
 180. **Subject Headings**  
 181. **Classification**  
 182. **Indexing**  
 183. **References**  
 184. **Appendix**  
 185. **Index**  
 186. **Table of Contents**  
 187. **Abstract**  
 188. **Summary**  
 189. **Key Words**  
 190. **Keywords**  
 191. **Subject Headings**  
 192. **Classification**  
 193. **Indexing**  
 194. **References**  
 195. **Appendix**  
 196. **Index**  
 197. **Table of Contents**  
 198. **Abstract**  
 199. **Summary**  
 200. **Key Words**  
 201. **Keywords**  
 202. **Subject Headings**  
 203. **Classification**  
 204. **Indexing**  
 205. **References**  
 206. **Appendix**  
 207. **Index**  
 208. **Table of Contents**  
 209. **Abstract**  
 210. **Summary**  
 211. **Key Words**  
 212. **Keywords**  
 213. **Subject Headings**  
 214. **Classification**  
 215. **Indexing**  
 216. **References**  
 217. **Appendix**  
 218. **Index**  
 219. **Table of Contents**  
 220. **Abstract**  
 221. **Summary**  
 222. **Key Words**  
 223. **Keywords**  
 224. **Subject Headings**  
 225. **Classification**  
 226. **Indexing**  
 227. **References**  
 228. **Appendix**  
 229. **Index**  
 230. **Table of Contents**  
 231. **Abstract**  
 232. **Summary**  
 233. **Key Words**  
 234. **Keywords**  
 235. **Subject Headings**  
 236. **Classification**  
 237. **Indexing**  
 238. **References**  
 239. **Appendix**  
 240. **Index**  
 241. **Table of Contents**  
 242. **Abstract**  
 243. **Summary**  
 244. **Key Words**  
 245. **Keywords**  
 246. **Subject Headings**  
 247. **Classification**  
 248. **Indexing**  
 249. **References**  
 250. **Appendix**  
 251. **Index**  
 252. **Table of Contents**  
 253. **Abstract</**

1. **Introduction**  
 2. **Background**  
 3. **Methodology**  
 4. **Results**  
 5. **Discussion**  
 6. **Conclusion**  
 7. **References**  
 8. **Appendix**  
 9. **Figure 1**  
 10. **Figure 2**  
 11. **Figure 3**  
 12. **Figure 4**  
 13. **Figure 5**  
 14. **Figure 6**  
 15. **Figure 7**  
 16. **Figure 8**  
 17. **Figure 9**  
 18. **Figure 10**  
 19. **Figure 11**  
 20. **Figure 12**  
 21. **Figure 13**  
 22. **Figure 14**  
 23. **Figure 15**  
 24. **Figure 16**  
 25. **Figure 17**  
 26. **Figure 18**  
 27. **Figure 19**  
 28. **Figure 20**  
 29. **Figure 21**  
 30. **Figure 22**  
 31. **Figure 23**  
 32. **Figure 24**  
 33. **Figure 25**  
 34. **Figure 26**  
 35. **Figure 27**  
 36. **Figure 28**  
 37. **Figure 29**  
 38. **Figure 30**  
 39. **Figure 31**  
 40. **Figure 32**  
 41. **Figure 33**  
 42. **Figure 34**  
 43. **Figure 35**  
 44. **Figure 36**  
 45. **Figure 37**  
 46. **Figure 38**  
 47. **Figure 39**  
 48. **Figure 40**  
 49. **Figure 41**  
 50. **Figure 42**  
 51. **Figure 43**  
 52. **Figure 44**  
 53. **Figure 45**  
 54. **Figure 46**  
 55. **Figure 47**  
 56. **Figure 48**  
 57. **Figure 49**  
 58. **Figure 50**  
 59. **Figure 51**  
 60. **Figure 52**  
 61. **Figure 53**  
 62. **Figure 54**  
 63. **Figure 55**  
 64. **Figure 56**  
 65. **Figure 57**  
 66. **Figure 58**  
 67. **Figure 59**  
 68. **Figure 60**  
 69. **Figure 61**  
 70. **Figure 62**  
 71. **Figure 63**  
 72. **Figure 64**  
 73. **Figure 65**  
 74. **Figure 66**  
 75. **Figure 67**  
 76. **Figure 68**  
 77. **Figure 69**  
 78. **Figure 70**  
 79. **Figure 71**  
 80. **Figure 72**  
 81. **Figure 73**  
 82. **Figure 74**  
 83. **Figure 75**  
 84. **Figure 76**  
 85. **Figure 77**  
 86. **Figure 78**  
 87. **Figure 79**  
 88. **Figure 80**  
 89. **Figure 81**  
 90. **Figure 82**  
 91. **Figure 83**  
 92. **Figure 84**  
 93. **Figure 85**  
 94. **Figure 86**  
 95. **Figure 87**  
 96. **Figure 88**  
 97. **Figure 89**  
 98. **Figure 90**  
 99. **Figure 91**  
 100. **Figure 92**  
 101. **Figure 93**  
 102. **Figure 94**  
 103. **Figure 95**  
 104. **Figure 96**  
 105. **Figure 97**  
 106. **Figure 98**  
 107. **Figure 99**  
 108. **Figure 100**  
 109. **Figure 101**  
 110. **Figure 102**  
 111. **Figure 103**  
 112. **Figure 104**  
 113. **Figure 105**  
 114. **Figure 106**  
 115. **Figure 107**  
 116. **Figure 108**  
 117. **Figure 109**  
 118. **Figure 110**  
 119. **Figure 111**  
 120. **Figure 112**  
 121. **Figure 113**  
 122. **Figure 114**  
 123. **Figure 115**  
 124. **Figure 116**  
 125. **Figure 117**  
 126. **Figure 118**  
 127. **Figure 119**  
 128. **Figure 120**  
 129. **Figure 121**  
 130. **Figure 122**  
 131. **Figure 123**  
 132. **Figure 124**  
 133. **Figure 125**  
 134. **Figure 126**  
 135. **Figure 127**  
 136. **Figure 128**  
 137. **Figure 129**  
 138. **Figure 130**  
 139. **Figure 131**  
 140. **Figure 132**  
 141. **Figure 133**  
 142. **Figure 134**  
 143. **Figure 135**  
 144. **Figure 136**  
 145. **Figure 137**  
 146. **Figure 138**  
 147. **Figure 139**  
 148. **Figure 140**  
 149. **Figure 141**  
 150. **Figure 142**  
 151. **Figure 143**  
 152. **Figure 144**  
 153. **Figure 145**  
 154. **Figure 146**  
 155. **Figure 147**  
 156. **Figure 148**  
 157. **Figure 149**  
 158. **Figure 150**  
 159. **Figure 151**  
 160. **Figure 152**  
 161. **Figure 153**  
 162. **Figure 154**  
 163. **Figure 155**  
 164. **Figure 156**  
 165. **Figure 157**  
 166. **Figure 158**  
 167. **Figure 159**  
 168. **Figure 160**  
 169. **Figure 161**  
 170. **Figure 162**  
 171. **Figure 163**  
 172. **Figure 164**  
 173. **Figure 165**  
 174. **Figure 166**  
 175. **Figure 167**  
 176. **Figure 168**  
 177. **Figure 169**  
 178. **Figure 170**  
 179. **Figure 171**  
 180. **Figure 172**  
 181. **Figure 173**  
 182. **Figure 174**  
 183. **Figure 175**  
 184. **Figure 176**  
 185. **Figure 177**  
 186. **Figure 178**  
 187. **Figure 179**  
 188. **Figure 180**  
 189. **Figure 181**  
 190. **Figure 182**  
 191. **Figure 183**  
 192. **Figure 184**  
 193. **Figure 185**  
 194. **Figure 186**  
 195. **Figure 187**  
 196. **Figure 188**  
 197. **Figure 189**  
 198. **Figure 190**  
 199. **Figure 191**  
 200. **Figure 192**  
 201. **Figure 193**  
 202. **Figure 194**  
 203. **Figure 195**  
 204. **Figure 196**  
 205. **Figure 197**  
 206. **Figure 198**  
 207. **Figure 199**  
 208. **Figure 200**  
 209. **Figure 201**  
 210. **Figure 202**  
 211. **Figure 203**  
 212. **Figure 204**  
 213. **Figure 205**  
 214. **Figure 206**  
 215. **Figure 207**  
 216. **Figure 208**  
 217. **Figure 209**

| Question | Correct Answers (Blue Dots) | Incorrect Answers (Red Dots) |
|----------|-----------------------------|------------------------------|
| 1        | 8                           | 2                            |
| 2        | 7                           | 3                            |
| 3        | 6                           | 4                            |
| 4        | 5                           | 5                            |
| 5        | 4                           | 6                            |
| 6        | 3                           | 7                            |
| 7        | 2                           | 8                            |
| 8        | 1                           | 9                            |
| 9        | 0                           | 10                           |
| 10       | 0                           | 10                           |

| Category      | Item                   | Value   |
|---------------|------------------------|---------|
| Agriculture   | Wheat                  | 1200000 |
|               | Corn                   | 800000  |
|               | Soybeans               | 500000  |
|               | Rice                   | 300000  |
|               | Barley                 | 200000  |
|               | Oats                   | 150000  |
|               | Hay                    | 100000  |
|               | Alfalfa                | 80000   |
|               | Flax                   | 60000   |
|               | Cotton                 | 40000   |
| Manufacturing | Automobiles            | 2500000 |
|               | Trucks                 | 1800000 |
|               | Tractors               | 1200000 |
|               | Harvesters             | 900000  |
|               | Plows                  | 700000  |
|               | Rippers                | 600000  |
|               | Discs                  | 500000  |
|               | Rollers                | 400000  |
|               | Balers                 | 300000  |
|               | Grain Elevators        | 200000  |
| Retail        | Food Stores            | 1500000 |
|               | Hardware Stores        | 1200000 |
|               | Gas Stations           | 1000000 |
|               | Auto Repair Shops      | 800000  |
|               | Tractor Dealerships    | 700000  |
|               | Harvester Dealerships  | 600000  |
|               | Plow Dealerships       | 500000  |
|               | Ripper Dealerships     | 400000  |
|               | Disc Dealerships       | 300000  |
|               | Roller Dealerships     | 200000  |
| Services      | Insurance Companies    | 1800000 |
|               | Banking Institutions   | 1500000 |
|               | Real Estate Firms      | 1200000 |
|               | Legal Firms            | 1000000 |
|               | Accounting Firms       | 800000  |
|               | Engineering Firms      | 700000  |
|               | Architectural Firms    | 600000  |
|               | Consulting Firms       | 500000  |
|               | Advertising Agencies   | 400000  |
|               | Public Relations Firms | 300000  |

[illegible]

| Age Group | Percentage |
|-----------|------------|
| 18-24     | 10%        |
| 25-34     | 15%        |
| 35-44     | 20%        |
| 45-54     | 25%        |
| 55-64     | 30%        |
| 65-74     | 35%        |
| 75-84     | 15%        |
| 85+       | 10%        |

| Age Group | Percentage |
|-----------|------------|
| 18-24     | 10%        |
| 25-34     | 15%        |
| 35-44     | 20%        |
| 45-54     | 25%        |
| 55-64     | 30%        |
| 65-74     | 35%        |
| 75-84     | 40%        |
| 85+       | 45%        |

[illegible]

1. **Introduction**  
 2. **Background**  
 3. **Methodology**  
 4. **Results**  
 5. **Discussion**  
 6. **Conclusion**  
 7. **References**  
 8. **Appendix**  
 9. **Figure 1**  
 10. **Figure 2**  
 11. **Figure 3**  
 12. **Figure 4**  
 13. **Figure 5**  
 14. **Figure 6**  
 15. **Figure 7**  
 16. **Figure 8**  
 17. **Figure 9**  
 18. **Figure 10**  
 19. **Figure 11**  
 20. **Figure 12**  
 21. **Figure 13**  
 22. **Figure 14**  
 23. **Figure 15**  
 24. **Figure 16**  
 25. **Figure 17**  
 26. **Figure 18**  
 27. **Figure 19**  
 28. **Figure 20**  
 29. **Figure 21**  
 30. **Figure 22**  
 31. **Figure 23**  
 32. **Figure 24**  
 33. **Figure 25**  
 34. **Figure 26**  
 35. **Figure 27**  
 36. **Figure 28**  
 37. **Figure 29**  
 38. **Figure 30**  
 39. **Figure 31**  
 40. **Figure 32**  
 41. **Figure 33**  
 42. **Figure 34**  
 43. **Figure 35**  
 44. **Figure 36**  
 45. **Figure 37**  
 46. **Figure 38**  
 47. **Figure 39**  
 48. **Figure 40**  
 49. **Figure 41**  
 50. **Figure 42**  
 51. **Figure 43**  
 52. **Figure 44**  
 53. **Figure 45**  
 54. **Figure 46**  
 55. **Figure 47**  
 56. **Figure 48**  
 57. **Figure 49**  
 58. **Figure 50**  
 59. **Figure 51**  
 60. **Figure 52**  
 61. **Figure 53**  
 62. **Figure 54**  
 63. **Figure 55**  
 64. **Figure 56**  
 65. **Figure 57**  
 66. **Figure 58**  
 67. **Figure 59**  
 68. **Figure 60**  
 69. **Figure 61**  
 70. **Figure 62**  
 71. **Figure 63**  
 72. **Figure 64**  
 73. **Figure 65**  
 74. **Figure 66**  
 75. **Figure 67**  
 76. **Figure 68**  
 77. **Figure 69**  
 78. **Figure 70**  
 79. **Figure 71**  
 80. **Figure 72**  
 81. **Figure 73**  
 82. **Figure 74**  
 83. **Figure 75**  
 84. **Figure 76**  
 85. **Figure 77**  
 86. **Figure 78**  
 87. **Figure 79**  
 88. **Figure 80**  
 89. **Figure 81**  
 90. **Figure 82**  
 91. **Figure 83**  
 92. **Figure 84**  
 93. **Figure 85**  
 94. **Figure 86**  
 95. **Figure 87**  
 96. **Figure 88**  
 97. **Figure 89**  
 98. **Figure 90**  
 99. **Figure 91**  
 100. **Figure 92**  
 101. **Figure 93**  
 102. **Figure 94**  
 103. **Figure 95**  
 104. **Figure 96**  
 105. **Figure 97**  
 106. **Figure 98**  
 107. **Figure 99**  
 108. **Figure 100**  
 109. **Figure 101**  
 110. **Figure 102**  
 111. **Figure 103**  
 112. **Figure 104**  
 113. **Figure 105**  
 114. **Figure 106**  
 115. **Figure 107**  
 116. **Figure 108**  
 117. **Figure 109**  
 118. **Figure 110**  
 119. **Figure 111**  
 120. **Figure 112**  
 121. **Figure 113**  
 122. **Figure 114**  
 123. **Figure 115**  
 124. **Figure 116**  
 125. **Figure 117**  
 126. **Figure 118**  
 127. **Figure 119**  
 128. **Figure 120**  
 129. **Figure 121**  
 130. **Figure 122**  
 131. **Figure 123**  
 132. **Figure 124**  
 133. **Figure 125**  
 134. **Figure 126**  
 135. **Figure 127**  
 136. **Figure 128**  
 137. **Figure 129**  
 138. **Figure 130**  
 139. **Figure 131**  
 140. **Figure 132**  
 141. **Figure 133**  
 142. **Figure 134**  
 143. **Figure 135**  
 144. **Figure 136**  
 145. **Figure 137**  
 146. **Figure 138**  
 147. **Figure 139**  
 148. **Figure 140**  
 149. **Figure 141**  
 150. **Figure 142**  
 151. **Figure 143**  
 152. **Figure 144**  
 153. **Figure 145**  
 154. **Figure 146**  
 155. **Figure 147**  
 156. **Figure 148**  
 157. **Figure 149**  
 158. **Figure 150**  
 159. **Figure 151**  
 160. **Figure 152**  
 161. **Figure 153**  
 162. **Figure 154**  
 163. **Figure 155**  
 164. **Figure 156**  
 165. **Figure 157**  
 166. **Figure 158**  
 167. **Figure 159**  
 168. **Figure 160**  
 169. **Figure 161**  
 170. **Figure 162**  
 171. **Figure 163**  
 172. **Figure 164**  
 173. **Figure 165**  
 174. **Figure 166**  
 175. **Figure 167**  
 176. **Figure 168**  
 177. **Figure 169**  
 178. **Figure 170**  
 179. **Figure 171**  
 180. **Figure 172**  
 181. **Figure 173**  
 182. **Figure 174**  
 183. **Figure 175**  
 184. **Figure 176**  
 185. **Figure 177**  
 186. **Figure 178**  
 187. **Figure 179**  
 188. **Figure 180**  
 189. **Figure 181**  
 190. **Figure 182**  
 191. **Figure 183**  
 192. **Figure 184**  
 193. **Figure 185**  
 194. **Figure 186**  
 195. **Figure 187**  
 196. **Figure 188**  
 197. **Figure 189**  
 198. **Figure 190**  
 199. **Figure 191**  
 200. **Figure 192**  
 201. **Figure 193**  
 202. **Figure 194**  
 203. **Figure 195**  
 204. **Figure 196**  
 205. **Figure 197**  
 206. **Figure 198**  
 207. **Figure 199**  
 208. **Figure 200**  
 209. **Figure 201**  
 210. **Figure 202**  
 211. **Figure 203**  
 212. **Figure 204**  
 213. **Figure 205**  
 214. **Figure 206**  
 215. **Figure 207**  
 216. **Figure 208**  
 217. **Figure 209**

| Age Group | Percentage |
|-----------|------------|
| 18-24     | ~5%        |
| 25-34     | ~10%       |
| 35-44     | ~15%       |
| 45-54     | ~20%       |
| 55-64     | ~25%       |
| 65-74     | ~30%       |
| 75-84     | ~85%       |
| 85+       | ~10%       |

1. **Introduction**  
 2. **Background**  
 3. **Methodology**  
 4. **Results**  
 5. **Discussion**  
 6. **Conclusion**  
 7. **References**  
 8. **Appendix**  
 9. **Figure 1**  
 10. **Figure 2**  
 11. **Figure 3**  
 12. **Figure 4**  
 13. **Figure 5**  
 14. **Figure 6**  
 15. **Figure 7**  
 16. **Figure 8**  
 17. **Figure 9**  
 18. **Figure 10**  
 19. **Figure 11**  
 20. **Figure 12**  
 21. **Figure 13**  
 22. **Figure 14**  
 23. **Figure 15**  
 24. **Figure 16**  
 25. **Figure 17**  
 26. **Figure 18**  
 27. **Figure 19**  
 28. **Figure 20**  
 29. **Figure 21**  
 30. **Figure 22**  
 31. **Figure 23**  
 32. **Figure 24**  
 33. **Figure 25**  
 34. **Figure 26**  
 35. **Figure 27**  
 36. **Figure 28**  
 37. **Figure 29**  
 38. **Figure 30**  
 39. **Figure 31**  
 40. **Figure 32**  
 41. **Figure 33**  
 42. **Figure 34**  
 43. **Figure 35**  
 44. **Figure 36**  
 45. **Figure 37**  
 46. **Figure 38**  
 47. **Figure 39**  
 48. **Figure 40**  
 49. **Figure 41**  
 50. **Figure 42**  
 51. **Figure 43**  
 52. **Figure 44**  
 53. **Figure 45**  
 54. **Figure 46**  
 55. **Figure 47**  
 56. **Figure 48**  
 57. **Figure 49**  
 58. **Figure 50**  
 59. **Figure 51**  
 60. **Figure 52**  
 61. **Figure 53**  
 62. **Figure 54**  
 63. **Figure 55**  
 64. **Figure 56**  
 65. **Figure 57**  
 66. **Figure 58**  
 67. **Figure 59**  
 68. **Figure 60**  
 69. **Figure 61**  
 70. **Figure 62**  
 71. **Figure 63**  
 72. **Figure 64**  
 73. **Figure 65**  
 74. **Figure 66**  
 75. **Figure 67**  
 76. **Figure 68**  
 77. **Figure 69**  
 78. **Figure 70**  
 79. **Figure 71**  
 80. **Figure 72**  
 81. **Figure 73**  
 82. **Figure 74**  
 83. **Figure 75**  
 84. **Figure 76**  
 85. **Figure 77**  
 86. **Figure 78**  
 87. **Figure 79**  
 88. **Figure 80**  
 89. **Figure 81**  
 90. **Figure 82**  
 91. **Figure 83**  
 92. **Figure 84**  
 93. **Figure 85**  
 94. **Figure 86**  
 95. **Figure 87**  
 96. **Figure 88**  
 97. **Figure 89**  
 98. **Figure 90**  
 99. **Figure 91**  
 100. **Figure 92**  
 101. **Figure 93**  
 102. **Figure 94**  
 103. **Figure 95**  
 104. **Figure 96**  
 105. **Figure 97**  
 106. **Figure 98**  
 107. **Figure 99**  
 108. **Figure 100**  
 109. **Figure 101**  
 110. **Figure 102**  
 111. **Figure 103**  
 112. **Figure 104**  
 113. **Figure 105**  
 114. **Figure 106**  
 115. **Figure 107**  
 116. **Figure 108**  
 117. **Figure 109**  
 118. **Figure 110**  
 119. **Figure 111**  
 120. **Figure 112**  
 121. **Figure 113**  
 122. **Figure 114**  
 123. **Figure 115**  
 124. **Figure 116**  
 125. **Figure 117**  
 126. **Figure 118**  
 127. **Figure 119**  
 128. **Figure 120**  
 129. **Figure 121**  
 130. **Figure 122**  
 131. **Figure 123**  
 132. **Figure 124**  
 133. **Figure 125**  
 134. **Figure 126**  
 135. **Figure 127**  
 136. **Figure 128**  
 137. **Figure 129**  
 138. **Figure 130**  
 139. **Figure 131**  
 140. **Figure 132**  
 141. **Figure 133**  
 142. **Figure 134**  
 143. **Figure 135**  
 144. **Figure 136**  
 145. **Figure 137**  
 146. **Figure 138**  
 147. **Figure 139**  
 148. **Figure 140**  
 149. **Figure 141**  
 150. **Figure 142**  
 151. **Figure 143**  
 152. **Figure 144**  
 153. **Figure 145**  
 154. **Figure 146**  
 155. **Figure 147**  
 156. **Figure 148**  
 157. **Figure 149**  
 158. **Figure 150**  
 159. **Figure 151**  
 160. **Figure 152**  
 161. **Figure 153**  
 162. **Figure 154**  
 163. **Figure 155**  
 164. **Figure 156**  
 165. **Figure 157**  
 166. **Figure 158**  
 167. **Figure 159**  
 168. **Figure 160**  
 169. **Figure 161**  
 170. **Figure 162**  
 171. **Figure 163**  
 172. **Figure 164**  
 173. **Figure 165**  
 174. **Figure 166**  
 175. **Figure 167**  
 176. **Figure 168**  
 177. **Figure 169**  
 178. **Figure 170**  
 179. **Figure 171**  
 180. **Figure 172**  
 181. **Figure 173**  
 182. **Figure 174**  
 183. **Figure 175**  
 184. **Figure 176**  
 185. **Figure 177**  
 186. **Figure 178**  
 187. **Figure 179**  
 188. **Figure 180**  
 189. **Figure 181**  
 190. **Figure 182**  
 191. **Figure 183**  
 192. **Figure 184**  
 193. **Figure 185**  
 194. **Figure 186**  
 195. **Figure 187**  
 196. **Figure 188**  
 197. **Figure 189**  
 198. **Figure 190**  
 199. **Figure 191**  
 200. **Figure 192**  
 201. **Figure 193**  
 202. **Figure 194**  
 203. **Figure 195**  
 204. **Figure 196**  
 205. **Figure 197**  
 206. **Figure 198**  
 207. **Figure 199**  
 208. **Figure 200**  
 209. **Figure 201**  
 210. **Figure 202**  
 211. **Figure 203**  
 212. **Figure 204**  
 213. **Figure 205**  
 214. **Figure 206**  
 215. **Figure 207**  
 216. **Figure 208**  
 217. **Figure 209**

**• • • • •**
