# Supplementary material for: Signal denoising through topographic modularity of neural circuits
Source: eLife journal article supplement (doi:10.7554/elife.77009), 2023-01-26
Supplement: supp [file fig4_c_right.pdf › figure4/plots/fig4_c_right.pdf]

1944.

**QUESTION**

• • • • •

1341

# Introduction

24
