# Supplementary material for: Signal denoising through topographic modularity of neural circuits
Source: eLife journal article supplement (doi:10.7554/elife.77009), 2023-01-26
Supplement: supp1 [file elife-77009-supp1-v2.pdf]

# Supplementary File 1

| A: Model Summary                      |                                                                                                                                                                                                                                                                                                                                                                                                                                                                                                                                                                                                                                                                                                                                                  |                                                                                     |
|---------------------------------------|--------------------------------------------------------------------------------------------------------------------------------------------------------------------------------------------------------------------------------------------------------------------------------------------------------------------------------------------------------------------------------------------------------------------------------------------------------------------------------------------------------------------------------------------------------------------------------------------------------------------------------------------------------------------------------------------------------------------------------------------------|-------------------------------------------------------------------------------------|
| <b>Populations</b>                    | Multiple modules, each one composed of 1 excitatory and 1 inhibitory sub-population                                                                                                                                                                                                                                                                                                                                                                                                                                                                                                                                                                                                                                                              |                                                                                     |
| <b>Topology</b>                       | None                                                                                                                                                                                                                                                                                                                                                                                                                                                                                                                                                                                                                                                                                                                                             |                                                                                     |
| <b>Connectivity</b>                   | Sparse, random recurrent connectivity with random or topographically structured feed-forward projections (fixed in-degrees)                                                                                                                                                                                                                                                                                                                                                                                                                                                                                                                                                                                                                      |                                                                                     |
| <b>Neuron Model</b>                   | Leaky integrate-and-fire, fixed voltage threshold, fixed absolute refractory time, no adaptation                                                                                                                                                                                                                                                                                                                                                                                                                                                                                                                                                                                                                                                 |                                                                                     |
| <b>Synapse Model</b>                  | Exponentially decaying postsynaptic currents, static synaptic weights, fixed delays                                                                                                                                                                                                                                                                                                                                                                                                                                                                                                                                                                                                                                                              |                                                                                     |
| <b>Plasticity</b>                     | None                                                                                                                                                                                                                                                                                                                                                                                                                                                                                                                                                                                                                                                                                                                                             |                                                                                     |
| <b>Input</b>                          | Stochastic background spikes and inhomogeneous Poisson spikes onto $d_0 N^E$ excitatory and $d_0 N^E$ inhibitory neurons in SSN <sub>0</sub>                                                                                                                                                                                                                                                                                                                                                                                                                                                                                                                                                                                                     |                                                                                     |
| <b>Measurements</b>                   | Spiking activity, membrane potentials                                                                                                                                                                                                                                                                                                                                                                                                                                                                                                                                                                                                                                                                                                            |                                                                                     |
| B: Populations                        |                                                                                                                                                                                                                                                                                                                                                                                                                                                                                                                                                                                                                                                                                                                                                  |                                                                                     |
| <b>Name</b>                           | <b>Elements</b>                                                                                                                                                                                                                                                                                                                                                                                                                                                                                                                                                                                                                                                                                                                                  | <b>Size</b>                                                                         |
| $E_i$                                 | iaf_psc_exp                                                                                                                                                                                                                                                                                                                                                                                                                                                                                                                                                                                                                                                                                                                                      | 8000                                                                                |
| $I_i$                                 | iaf_psc_exp                                                                                                                                                                                                                                                                                                                                                                                                                                                                                                                                                                                                                                                                                                                                      | 2000                                                                                |
| C: Neuron Models                      |                                                                                                                                                                                                                                                                                                                                                                                                                                                                                                                                                                                                                                                                                                                                                  |                                                                                     |
| <b>Name</b>                           | Leaky integrate-and-fire (LIF) neuron (iaf_psc_exp)                                                                                                                                                                                                                                                                                                                                                                                                                                                                                                                                                                                                                                                                                              |                                                                                     |
| <b>Subthreshold Dynamics</b>          | <p>if <math>(t &gt; t^* + \tau_{\text{ref}})</math></p> $\tau_m \frac{dV_i(t)}{dt} = (V_{\text{rest}} - V_i(t)) + R_m (I_i^E(t) + I_i^I(t) + I_i^X(t))$ <p>else</p> $V(t) = V_{\text{reset}}$                                                                                                                                                                                                                                                                                                                                                                                                                                                                                                                                                    |                                                                                     |
| <b>Spiking</b>                        | <p>If <math>V(t-) &lt; V_{\text{th}}</math> OR <math>V(t+) \geq V_{\text{th}}</math></p> <p>1. set <math>t^* = t</math> 2. emit spike with time stamp <math>t^*</math></p>                                                                                                                                                                                                                                                                                                                                                                                                                                                                                                                                                                       |                                                                                     |
| D: Synapse Models                     |                                                                                                                                                                                                                                                                                                                                                                                                                                                                                                                                                                                                                                                                                                                                                  |                                                                                     |
| <b>Synaptic Transmission</b>          | $\tau_\beta \frac{dI_i^\beta(t)}{dt} = -I_i(t) + \tau_\beta \hat{I}_\beta \sum_j \sum_k \delta(t - t_j^k)$ <p>with postsynaptic potential <math>\text{PSP}_{ij}(t) = \hat{I}_\beta \frac{R_m \tau_\beta}{\tau_\beta - \tau_m} (e^{-t/\tau_\beta} - e^{-t/\tau_m}) \Theta(t)</math></p> <p>and Heaviside function <math>\Theta(t) = \begin{cases} 1 &amp; t \geq 0 \\ 0 &amp; \text{else} \end{cases}</math>.</p> <p>The synaptic efficacy (weight) corresponds to the PSP amplitude:</p> $J_\beta = \hat{I}_\beta R_m \frac{\tau_\beta}{\tau_\beta - \tau_m} \left( \left[ \frac{\tau_m}{\tau_\beta} \right]^{\frac{-\tau_m}{\tau_m - \tau_\beta}} - \left[ \frac{\tau_m}{\tau_\beta} \right]^{\frac{-\tau_\beta}{\tau_m - \tau_\beta}} \right)$ |                                                                                     |
| E: Input                              |                                                                                                                                                                                                                                                                                                                                                                                                                                                                                                                                                                                                                                                                                                                                                  |                                                                                     |
| <b>Type</b>                           | <b>Target</b>                                                                                                                                                                                                                                                                                                                                                                                                                                                                                                                                                                                                                                                                                                                                    | <b>Description</b>                                                                  |
| poisson_generator                     | $E_0, I_0$                                                                                                                                                                                                                                                                                                                                                                                                                                                                                                                                                                                                                                                                                                                                       | Total rate $\nu_X \cdot K_X$                                                        |
| poisson_generator                     | $E_i, I_i$ for $i > 0$                                                                                                                                                                                                                                                                                                                                                                                                                                                                                                                                                                                                                                                                                                                           | Total rate $0.25 \cdot \nu_X \cdot K_X$                                             |
| inhomogeneous_poisson_generator       | $E_0^{(k)}, I_0^{(k)}$ for $S_k \in \mathcal{S}$<br>$E_0^{(j)}, I_0^{(j)}$ for $S'_j \in \mathcal{S}'$                                                                                                                                                                                                                                                                                                                                                                                                                                                                                                                                                                                                                                           | Inhomogeneous Poisson process with rate $\nu_{\text{stim}}$ , changing every 200 ms |
| F: Measurements                       |                                                                                                                                                                                                                                                                                                                                                                                                                                                                                                                                                                                                                                                                                                                                                  |                                                                                     |
| Spiking activity, membrane potentials |                                                                                                                                                                                                                                                                                                                                                                                                                                                                                                                                                                                                                                                                                                                                                  |                                                                                     |

**Table 1:** Tabular description of current-based (baseline) network model after [94].
