# Supplementary material for: Signal denoising through topographic modularity of neural circuits
Source: eLife journal article supplement (doi:10.7554/elife.77009), 2023-01-26
Supplement: supp3 [file elife-77009-supp3-v2.pdf]

## Supplementary File 3

| A: Populations   |                           |                                                                               |
|------------------|---------------------------|-------------------------------------------------------------------------------|
| Name             | Value                     | Description                                                                   |
| $N^E$            | 8000                      | Excitatory population size in each module                                     |
| $N^I$            | 2000                      | Excitatory population size in each module                                     |
| B: Connectivity  |                           |                                                                               |
| Name             | Value                     | Description                                                                   |
| $d$              | 1.5 ms                    | Synaptic transmission delay                                                   |
| $\bar{g}_E$      | 1nS                       | Excitatory synaptic conductance                                               |
| $\bar{g}_I$      | $g\bar{g}_E$ nS           | Inhibitory synaptic conductance                                               |
| $g$              | -16                       | Scaling factor for the inhibitory synapses                                    |
| $\epsilon$       | 0.1                       | Baseline connection probability                                               |
| $\alpha$         | 0.25                      | Connection scaling factor for $SSN_{i>0}$                                     |
| $p_x$            | $\epsilon$                | Connection probability for background noise input in $SSN_0$                  |
|                  | $\alpha\epsilon$          | Scaled connection probability for background input in $SSN_i, i > 0$          |
| $\sigma_i$       | $(1 - \alpha) * \epsilon$ | Fixed density of feed-forward projection matrices                             |
| $p_c$            | $(1 - m) * p_0$           | Feed-forward connection probability within topographic maps                   |
| $p_0$            | $(1 - m) * p_c$           | Feed-forward connection probability between SPs on different topographic maps |
| B: Neuron Model  |                           |                                                                               |
| Name             | Value                     | Description                                                                   |
| $C_m$            | 250 pF                    | Membrane capacitance                                                          |
| $E_L$            | -70 mV                    | Resting membrane potential                                                    |
| $\tau_m$         | 15 ms                     | Membrane time constant                                                        |
| $V_{th}$         | -50 mV                    | Membrane potential threshold for action-potential firing                      |
| $V_{reset}$      | -60 mV                    | Reset potential                                                               |
| $\tau_{ref}$     | 2 ms                      | Absolute refractory period                                                    |
| $g_L$            | 16.7nS                    | Leak conductance                                                              |
| C: Synapse Model |                           |                                                                               |
| $\tau_E$         | 5 ms                      | Synaptic decay time constant for excitatory synapses                          |
| $\tau_I$         | 10 ms                     | Synaptic decay time constant for inhibitory synapses                          |
| $V_E$            | 0 mV                      | Excitatory reversal potential                                                 |
| $V_I$            | -80 mV                    | Inhibitory reversal potential                                                 |

**Table 3:** Parameter values for the conductance-based model.
