# Supplementary material for: Signal denoising through topographic modularity of neural circuits
Source: eLife journal article supplement (doi:10.7554/elife.77009), 2023-01-26
Supplement: supp4 [file elife-77009-supp4-v2.pdf]

## Supplementary File 4

| A: Model Summary            |                                                                                                                                                                                                             |                                                                          |
|-----------------------------|-------------------------------------------------------------------------------------------------------------------------------------------------------------------------------------------------------------|--------------------------------------------------------------------------|
| Populations                 | Multiple modules, each one composed of 1 excitatory and 1 inhibitory sub-population                                                                                                                         |                                                                          |
| Topology                    | None                                                                                                                                                                                                        |                                                                          |
| Connectivity                | Sparse, random recurrent connectivity with modular topographic feed-forward projections (fixed in-degrees)                                                                                                  |                                                                          |
| Neuron Model                | Rate neuron with shifted tanh gain function                                                                                                                                                                 |                                                                          |
| Synapse Model               | Delayed rate connection                                                                                                                                                                                     |                                                                          |
| Plasticity                  | None                                                                                                                                                                                                        |                                                                          |
| Input                       | Uniformly distributed input onto $d_0 N^E$ excitatory and $d_0 N^E$ inhibitory neurons in $SSN_0$                                                                                                           |                                                                          |
| Measurements                | Unit output (rate)                                                                                                                                                                                          |                                                                          |
| B: Populations              |                                                                                                                                                                                                             |                                                                          |
| Name                        | Elements                                                                                                                                                                                                    | Size                                                                     |
| $E_i$                       | rate neuron                                                                                                                                                                                                 | 2400                                                                     |
| $I_i$                       | rate neuron                                                                                                                                                                                                 | 600                                                                      |
| C: Neuron Models            |                                                                                                                                                                                                             |                                                                          |
| Name                        | Rate neuron                                                                                                                                                                                                 |                                                                          |
| Differential equation       | $\tau_{\mathbf{x}} \frac{d\mathbf{x}}{dt} = -\mathbf{x} + W\mathbf{r} + W^{\text{in}}\mathbf{u} - \mathbf{b}^{\text{rec}} + \sqrt{2\tau_{\mathbf{x}}}\sigma_X\xi$ $\mathbf{r} = 0.5(1 + \tanh(\mathbf{x}))$ |                                                                          |
| D: Input                    |                                                                                                                                                                                                             |                                                                          |
| Type                        | Target                                                                                                                                                                                                      | Description                                                              |
| random uniform distribution | $E_0, I_0$                                                                                                                                                                                                  | Step signal input to $SSN_0$ , changing every 200 ms, with amplitude 0.8 |
| Gaussian white noise        | $E_i, I_i$ for $i \in \{0..5\}$                                                                                                                                                                             | Intrinsic unit noise                                                     |
| E: Measurements             |                                                                                                                                                                                                             |                                                                          |
| Unit output (rate)          |                                                                                                                                                                                                             |                                                                          |

**Table 4:** Description of the rate model.
