# Supplementary material for: Signal denoising through topographic modularity of neural circuits
Source: eLife journal article supplement (doi:10.7554/elife.77009), 2023-01-26
Supplement: supp5 [file elife-77009-supp5-v2.pdf]

## Supplementary File 5

| <b>A: Populations</b>  |                                                  |                                                                                                  |
|------------------------|--------------------------------------------------|--------------------------------------------------------------------------------------------------|
| <b>Name</b>            | <b>Value</b>                                     | <b>Description</b>                                                                               |
| $N^E$                  | 2400                                             | Number of excitatory units in each module                                                        |
| $N^I$                  | 600                                              | Number of inhibitory units in each module                                                        |
| <b>B: Connectivity</b> |                                                  |                                                                                                  |
| <b>Name</b>            | <b>Value</b>                                     | <b>Description</b>                                                                               |
| $d$                    | 1 ms                                             | Synaptic transmission delay                                                                      |
| $\epsilon$             | 0.2                                              | Baseline connection probability                                                                  |
| $w_{\text{in}}$        | $\sim U(0.9, 1.0)$                               | Input weights                                                                                    |
| $w_{\text{in}}$        | $\sim N_{\text{tr}}(0, 1/\sqrt{\epsilon N}) > 0$ | Recurrent and feed-forward weights drawn from a normal distribution truncated to positive values |
| $g$                    | -6                                               | Scaling factor for the inhibitory synapses                                                       |
| <b>B: Neuron Model</b> |                                                  |                                                                                                  |
| <b>Name</b>            | <b>Value</b>                                     | <b>Description</b>                                                                               |
| $\tau$                 | 10 ms                                            | Unit time constant                                                                               |
| $b$                    | 1                                                | Bias term                                                                                        |
| $\sigma_X$             | 1.5                                              | Scaling term for unit noise                                                                      |

**Table 5:** Rate model parameters.
