# Supplementary figures and images for: Signal denoising through topographic modularity of neural circuits
Source: eLife journal article supplement (doi:10.7554/elife.77009), 2023-01-26

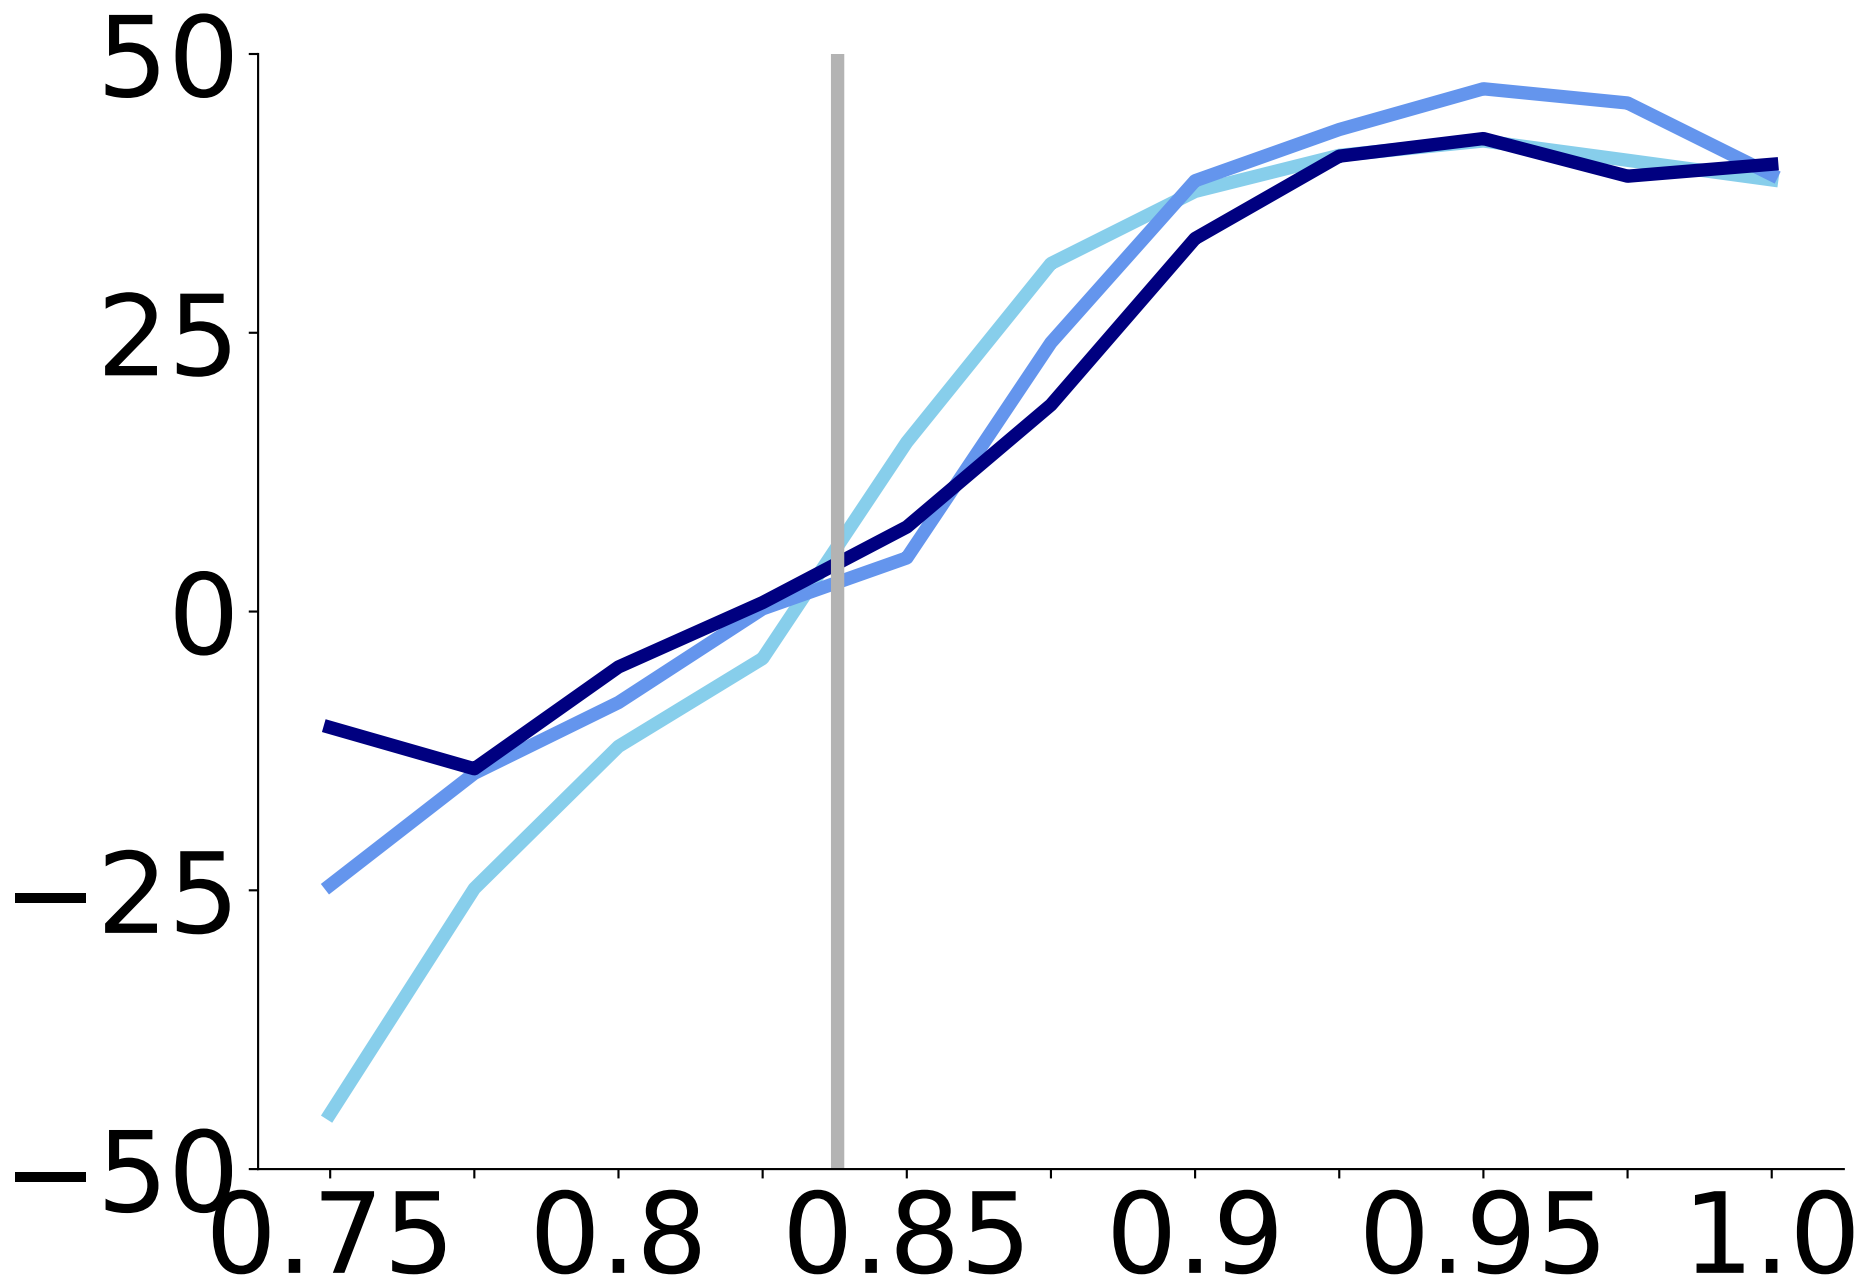

Supplement: fig1-data1 [file elife-77009-fig1-data1-v2.zip]

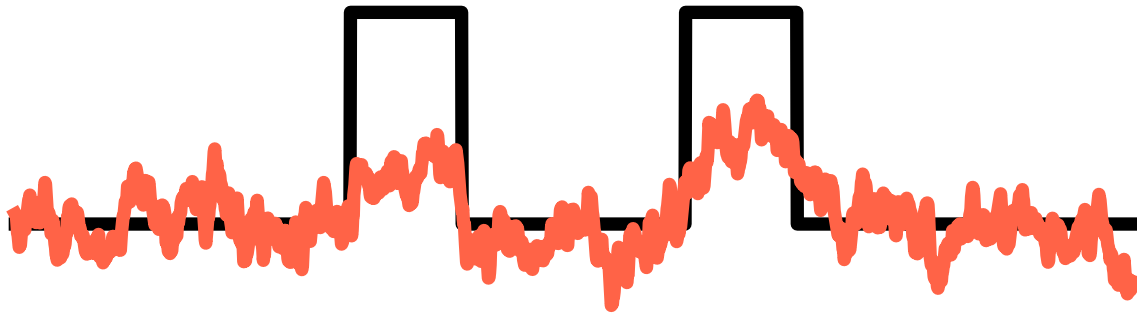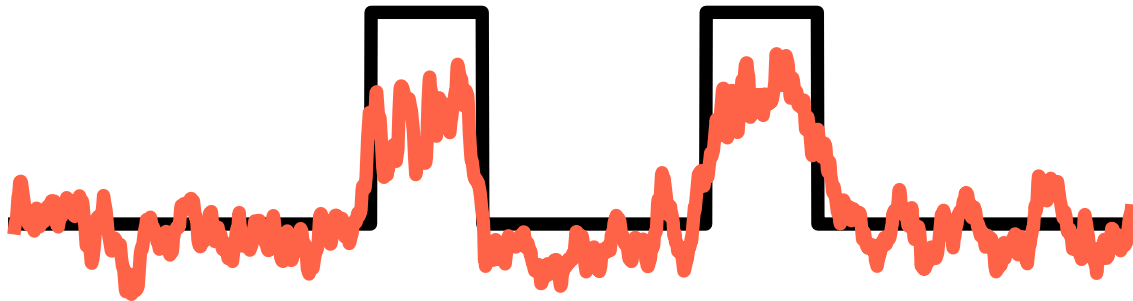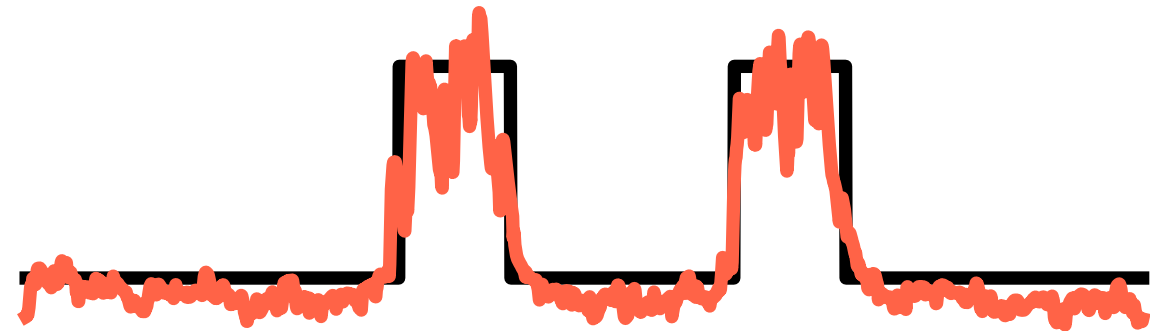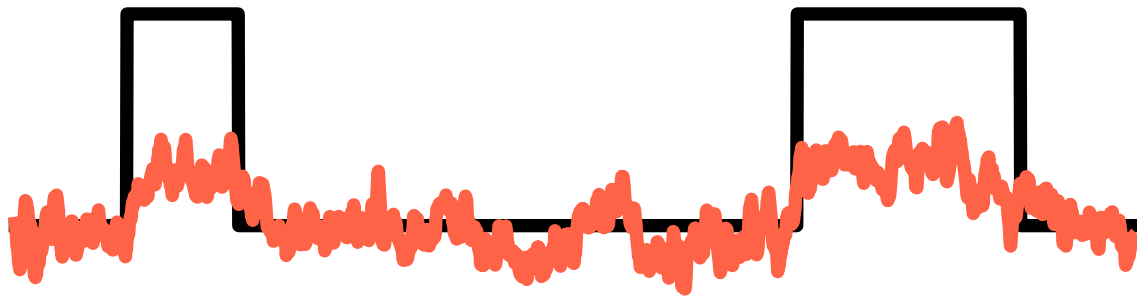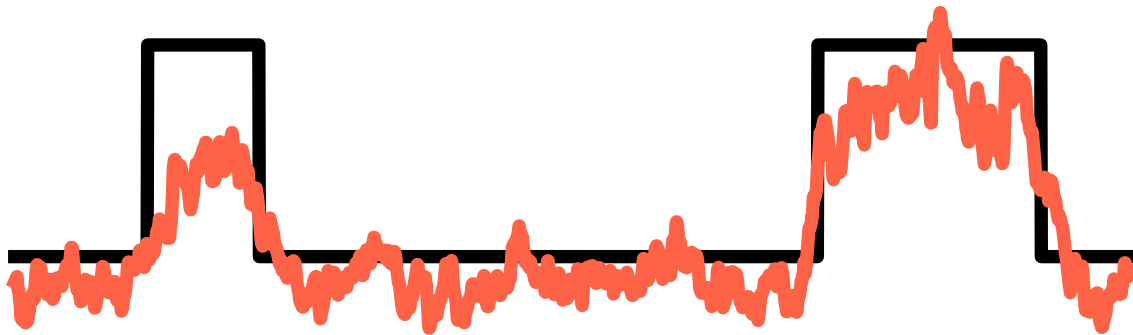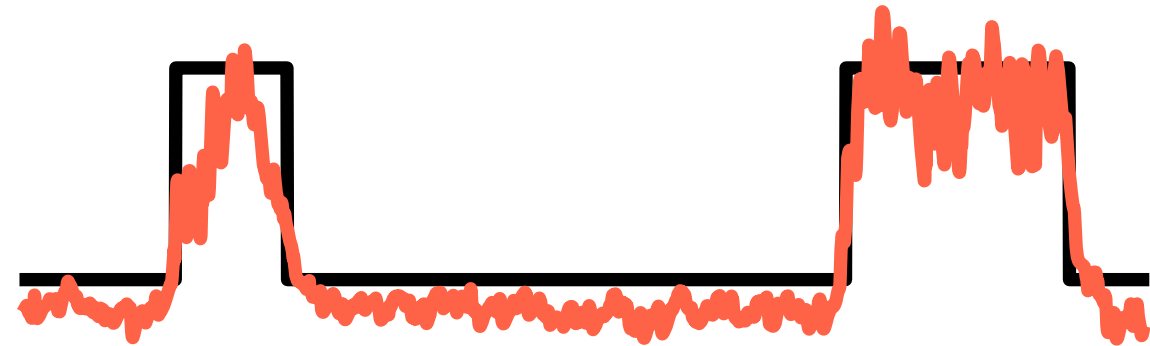

Supplement: fig1-data1 [file elife-77009-fig1-data1-v2.zip]

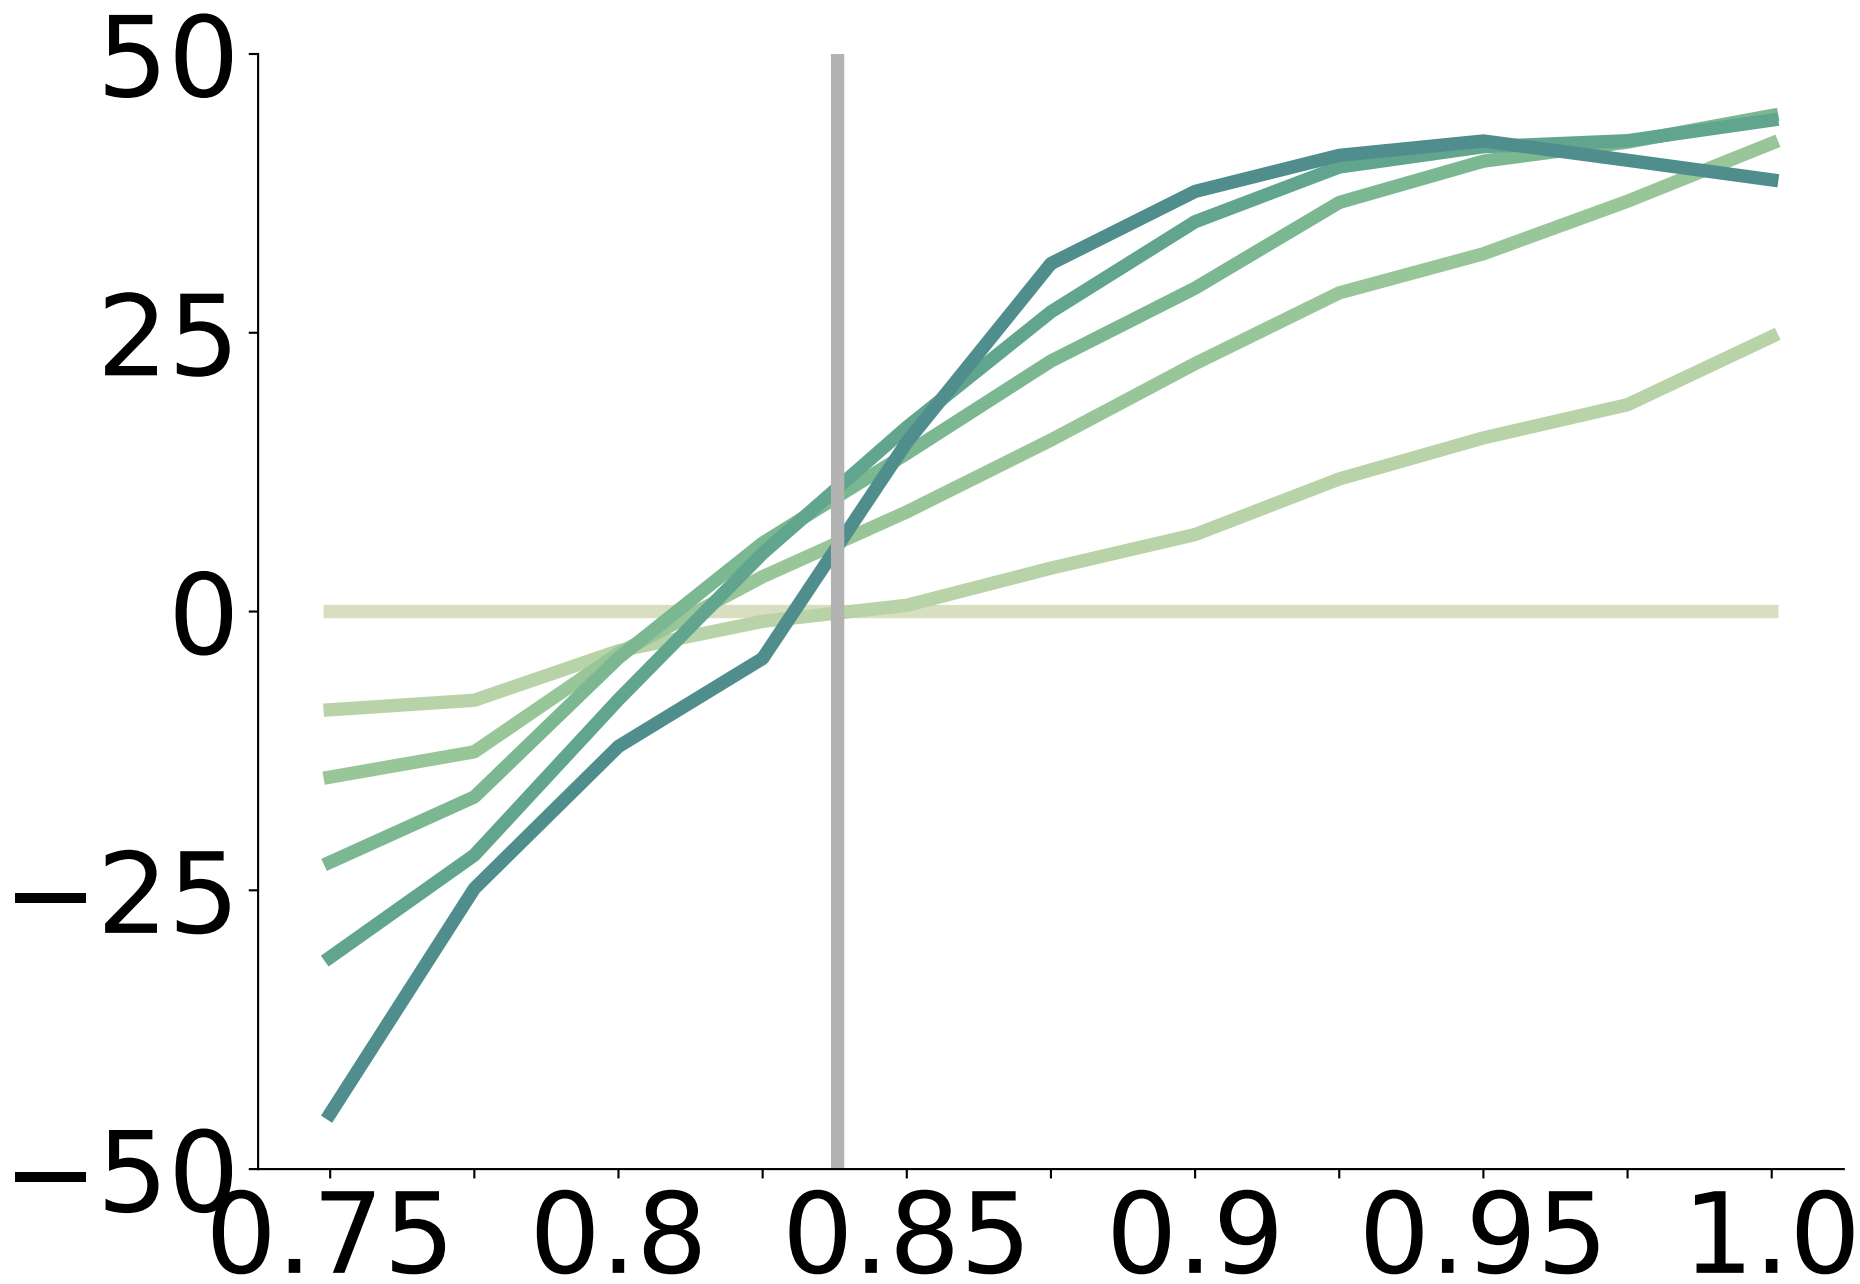

Supplement: fig1-data1 [file elife-77009-fig1-data1-v2.zip]

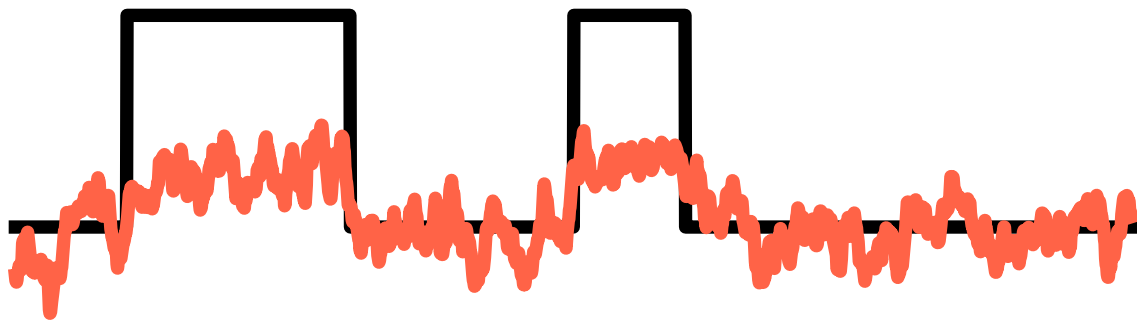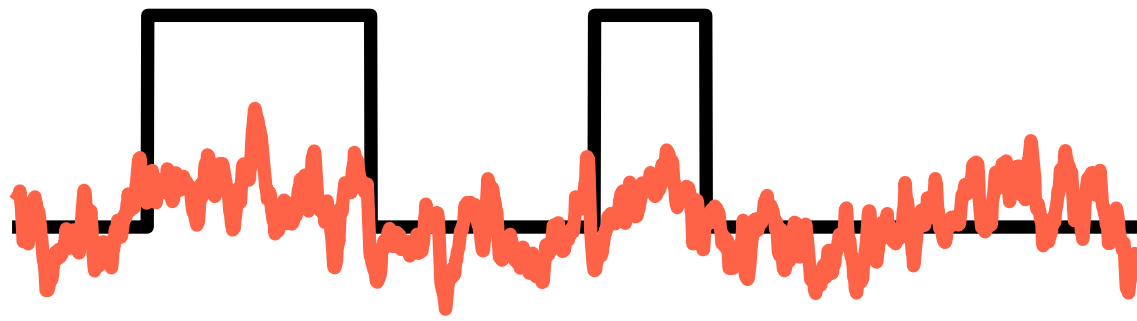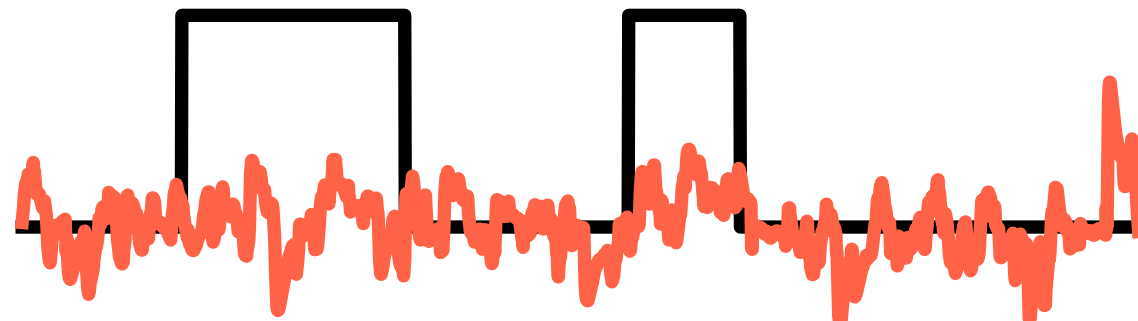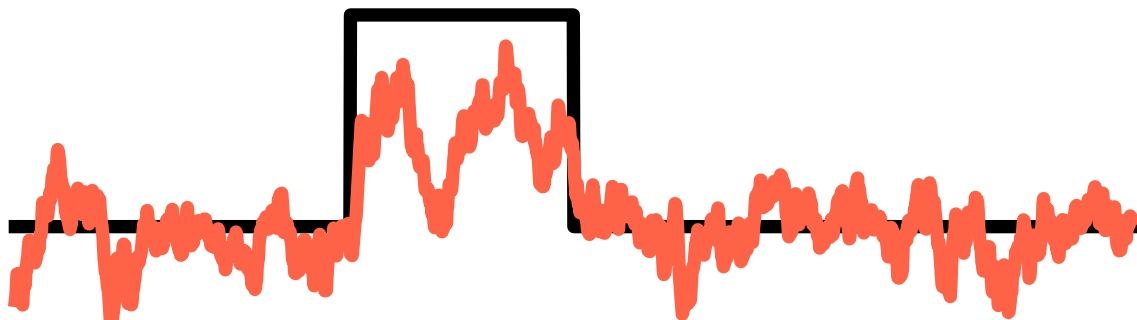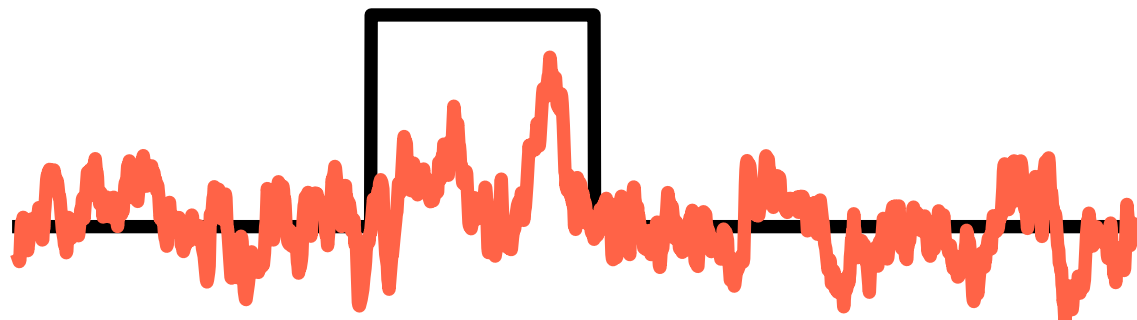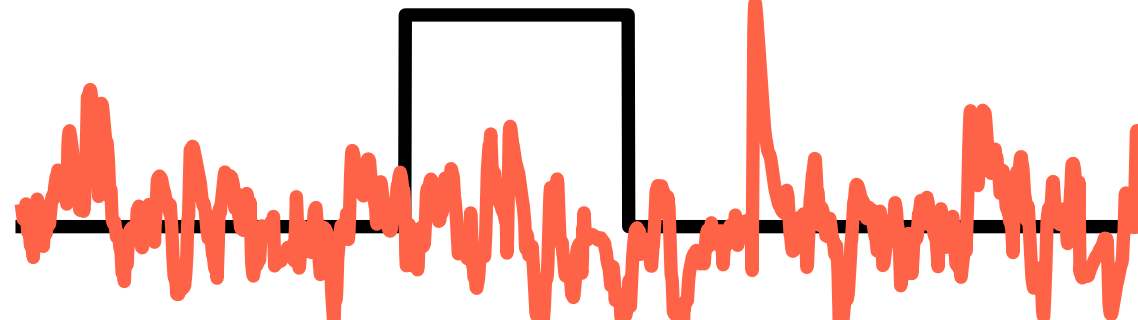

Supplement: fig1-data1 [file elife-77009-fig1-data1-v2.zip]

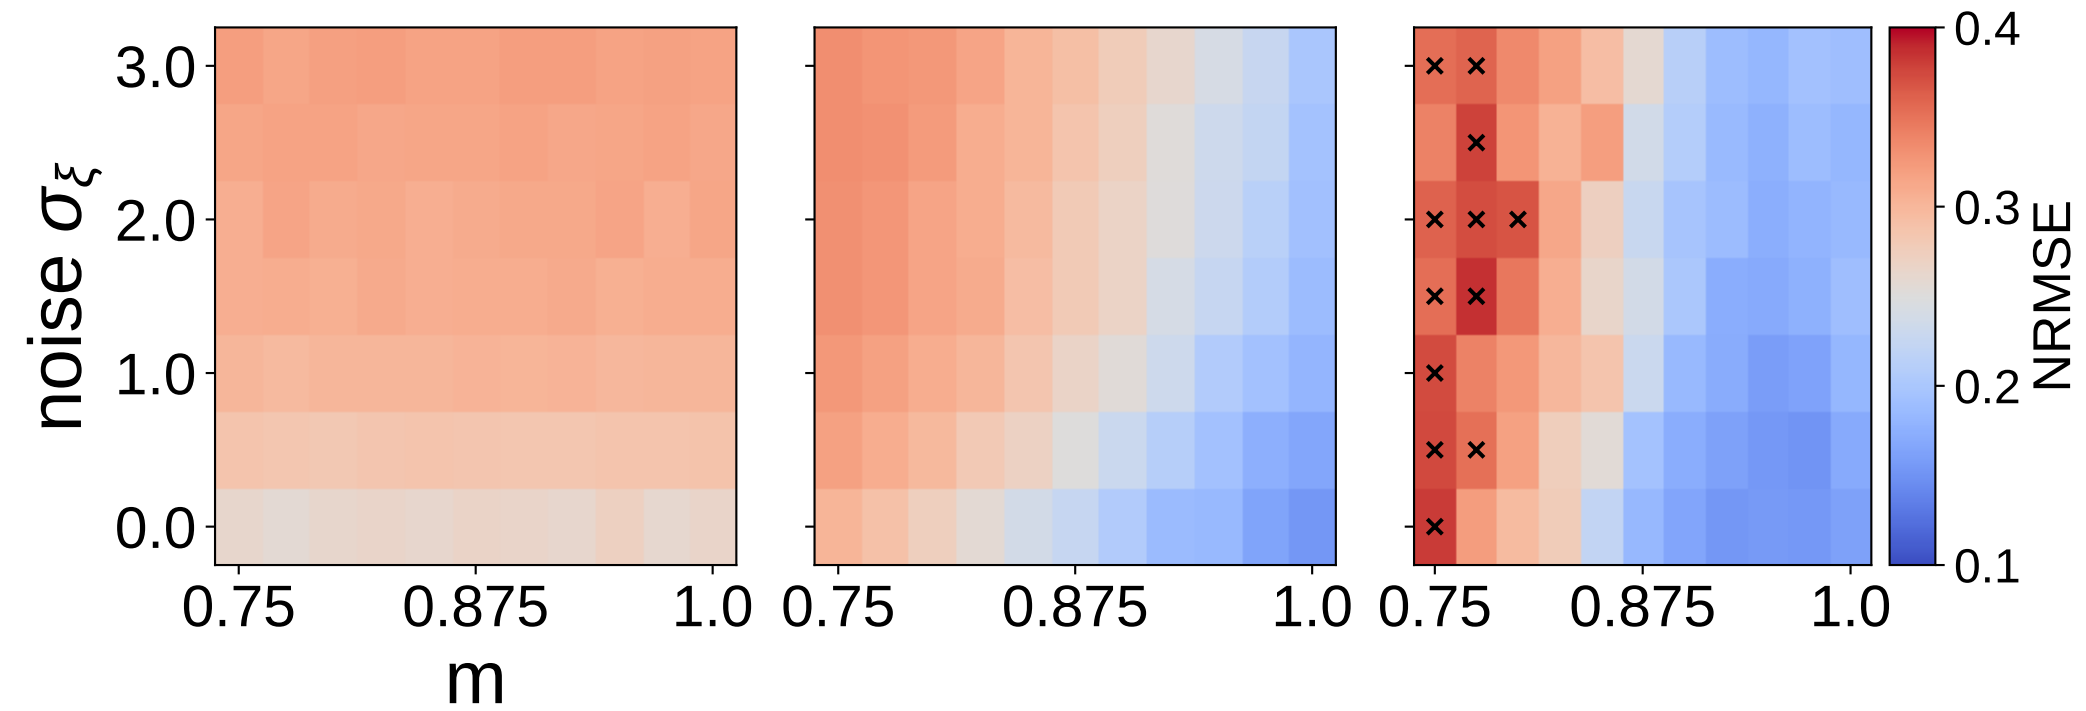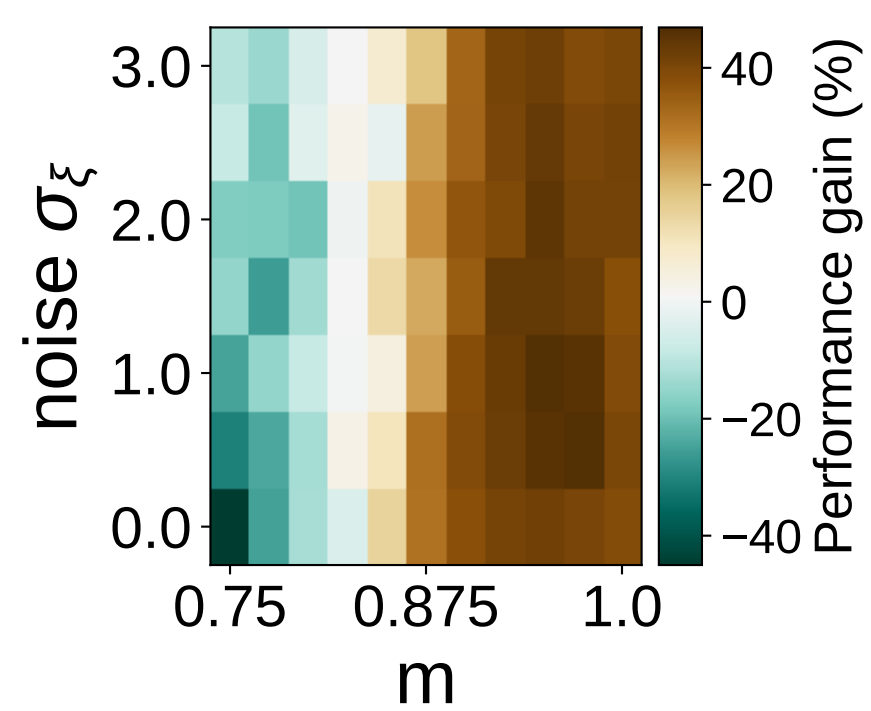

Supplement: fig1-data1 [file elife-77009-fig1-data1-v2.zip]

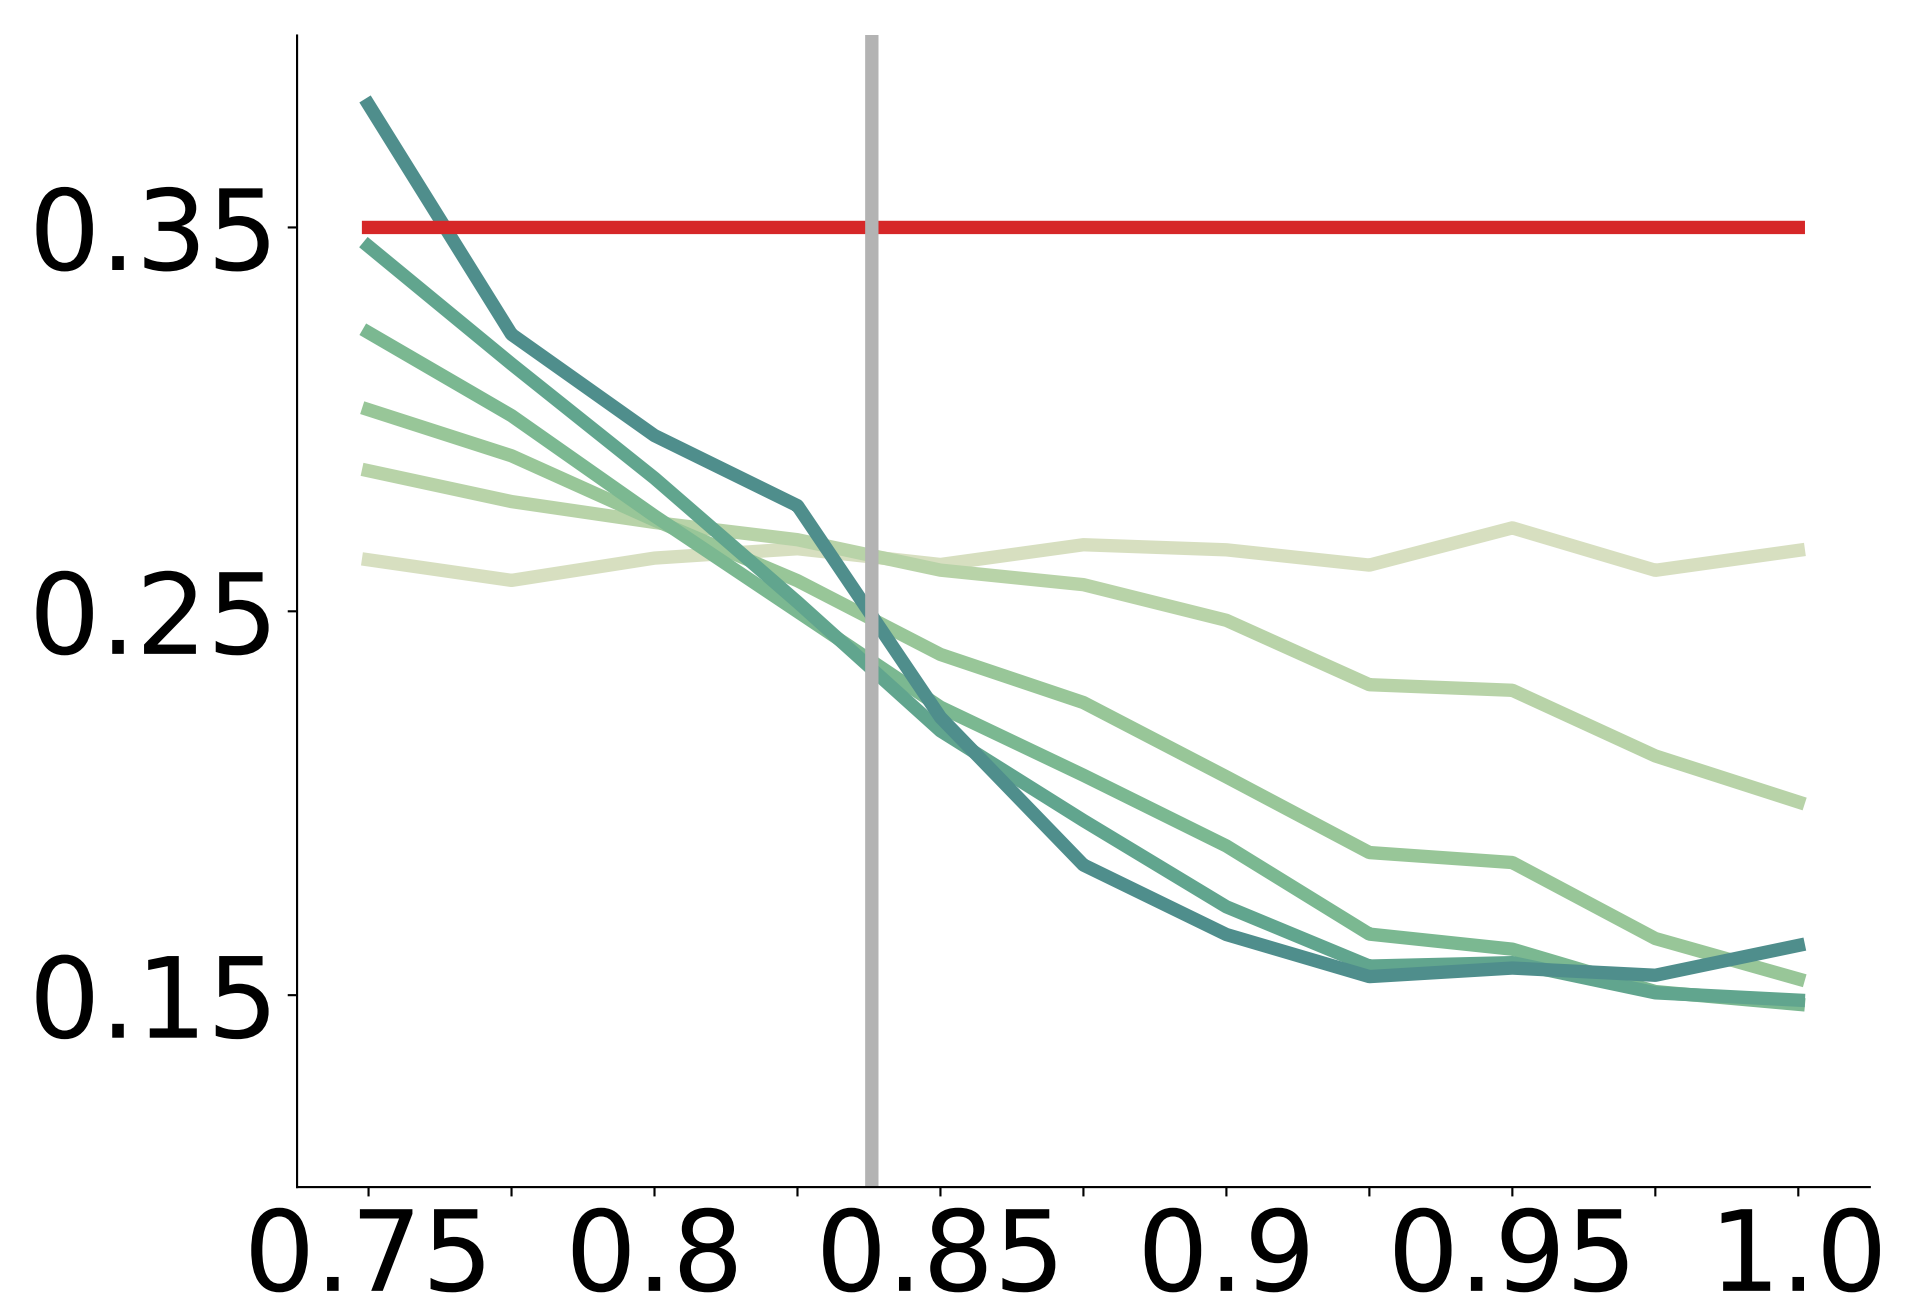

Supplement: fig1-data1 [file elife-77009-fig1-data1-v2.zip]

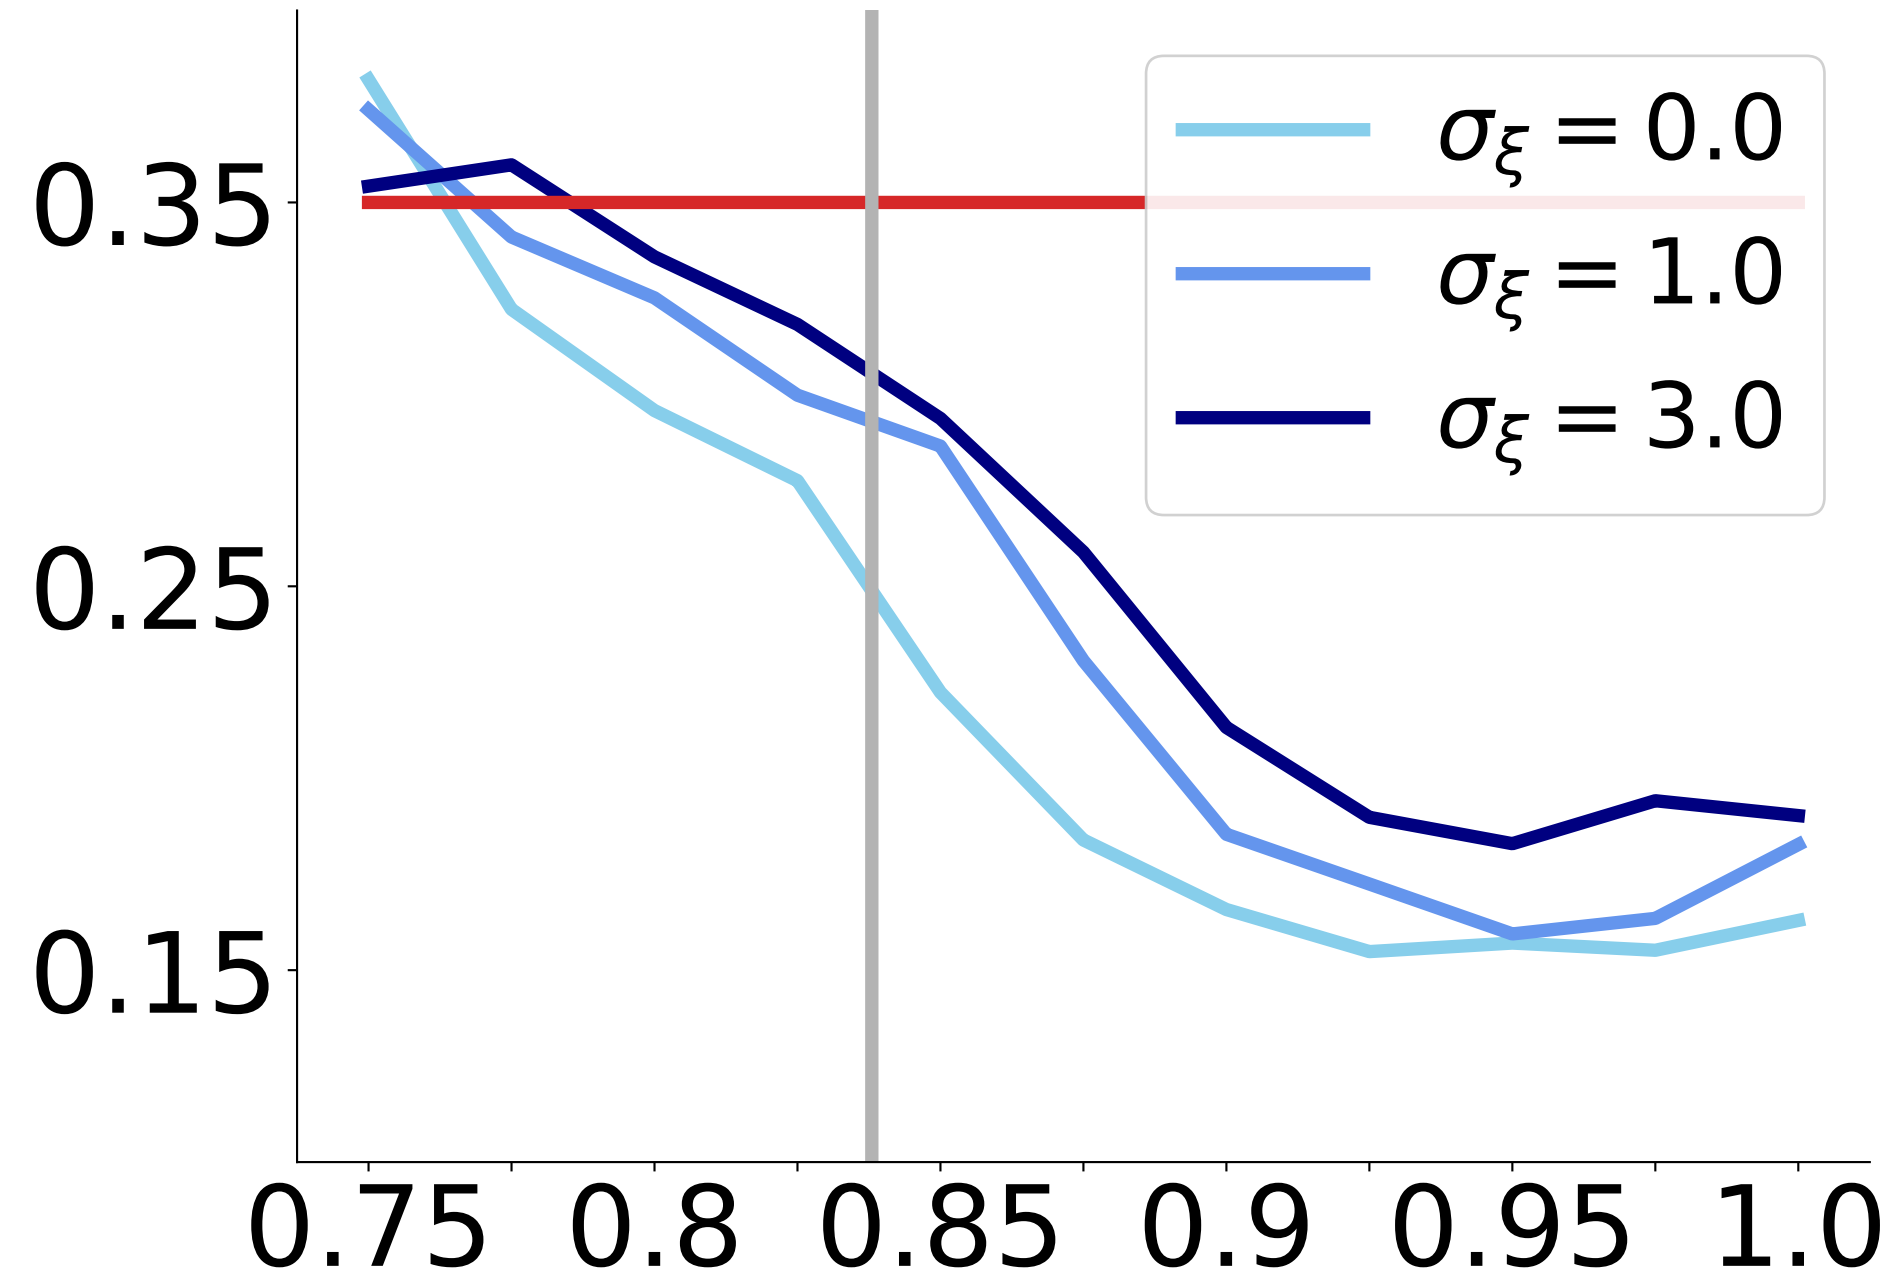

Supplement: fig1-data1 [file elife-77009-fig1-data1-v2.zip]

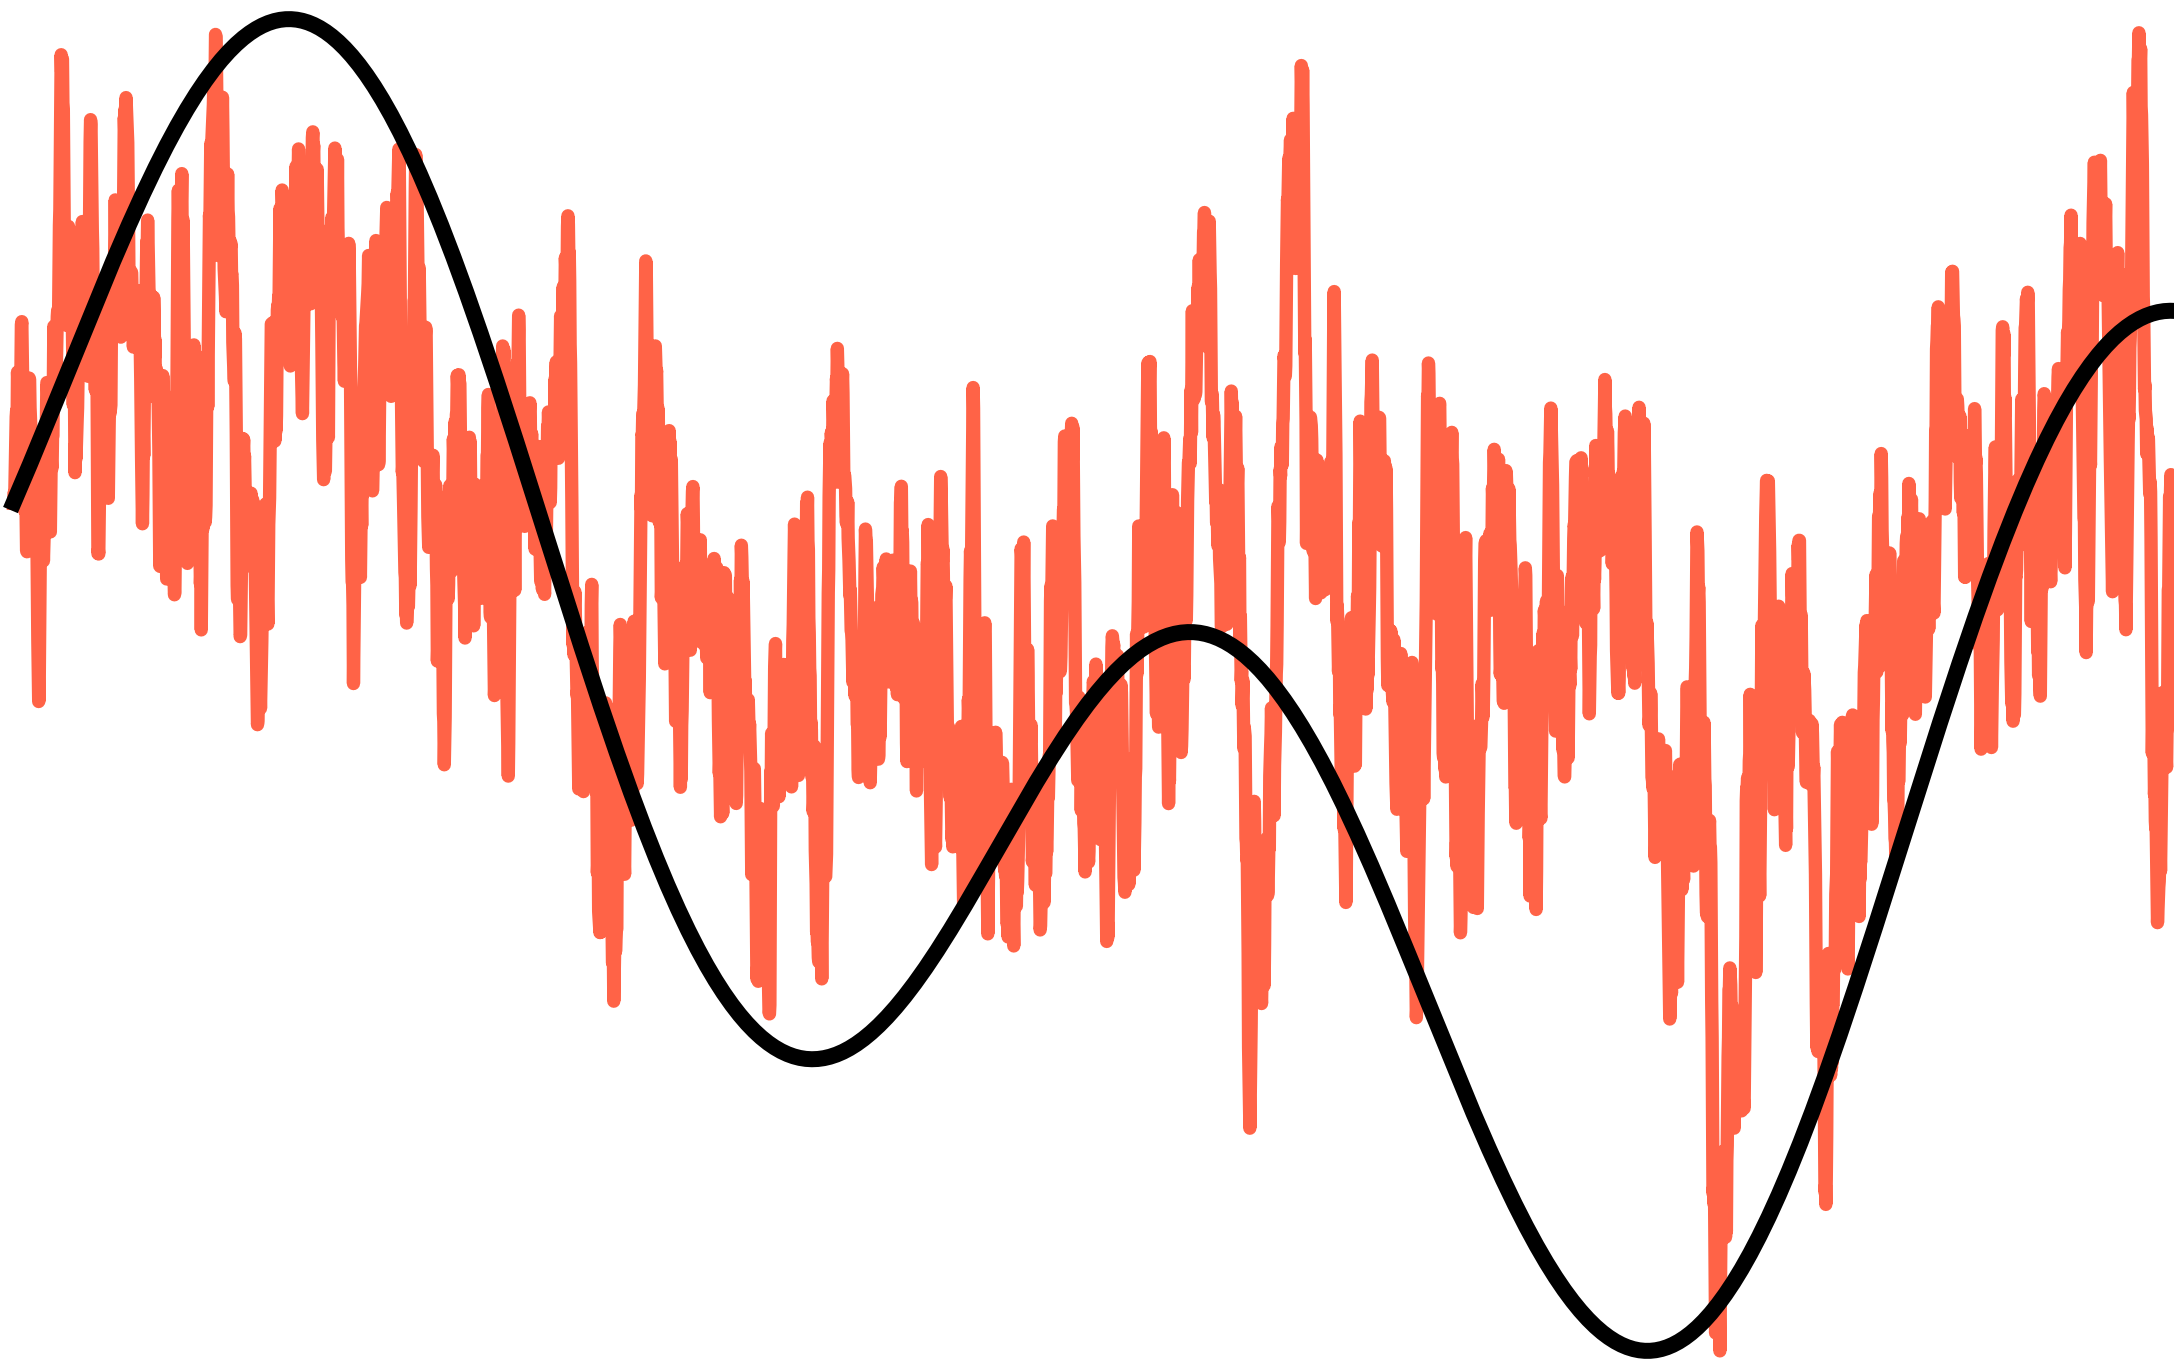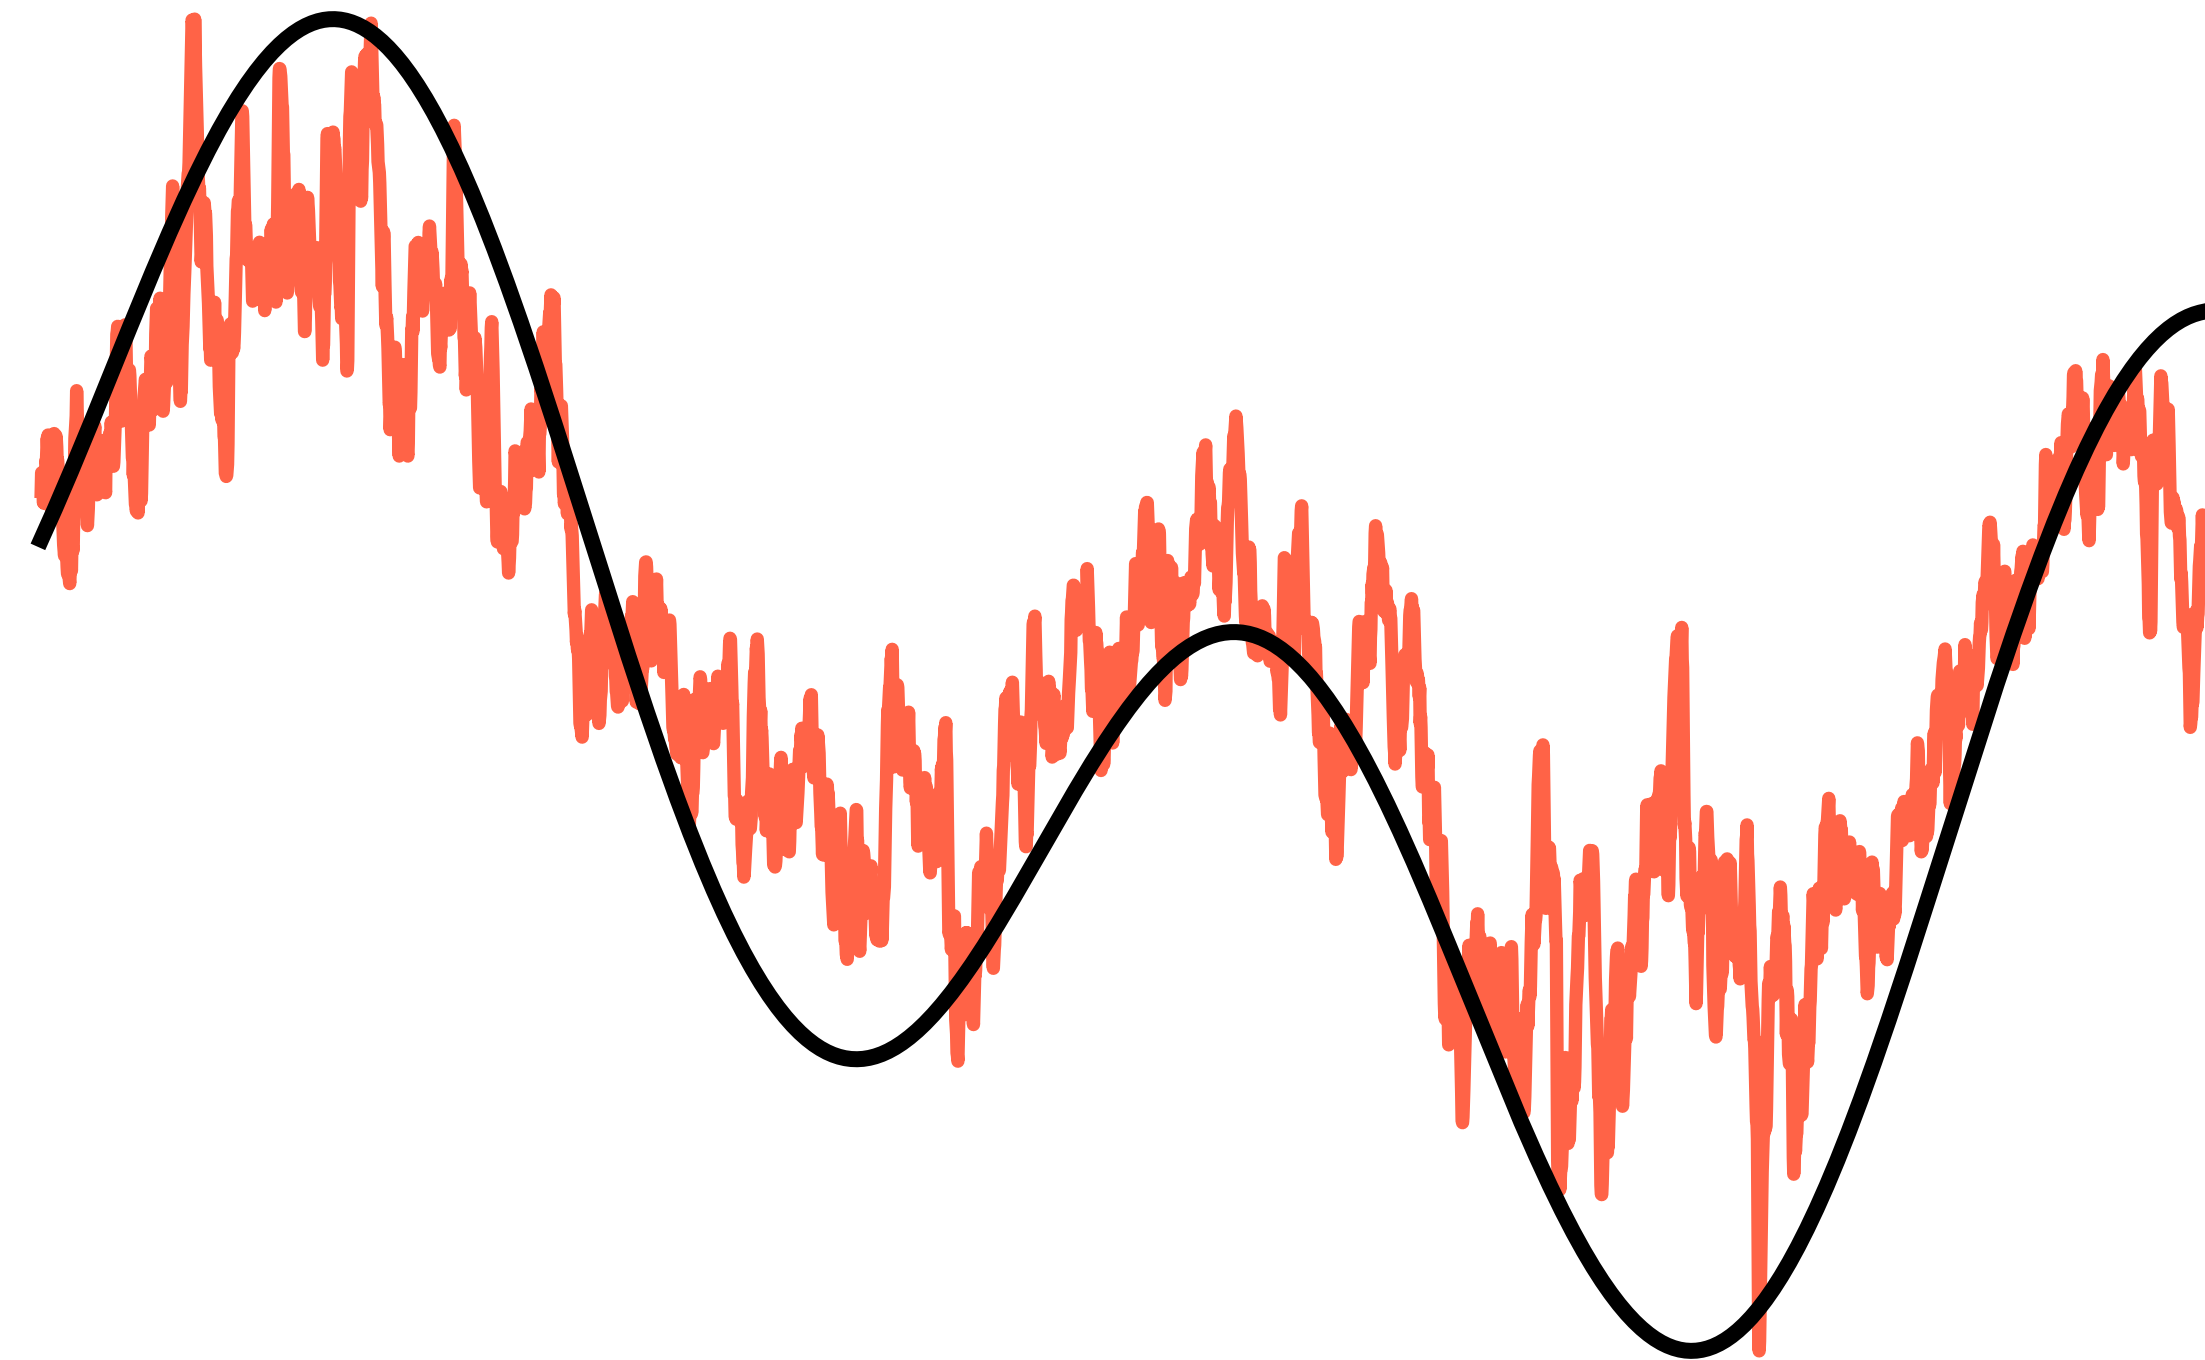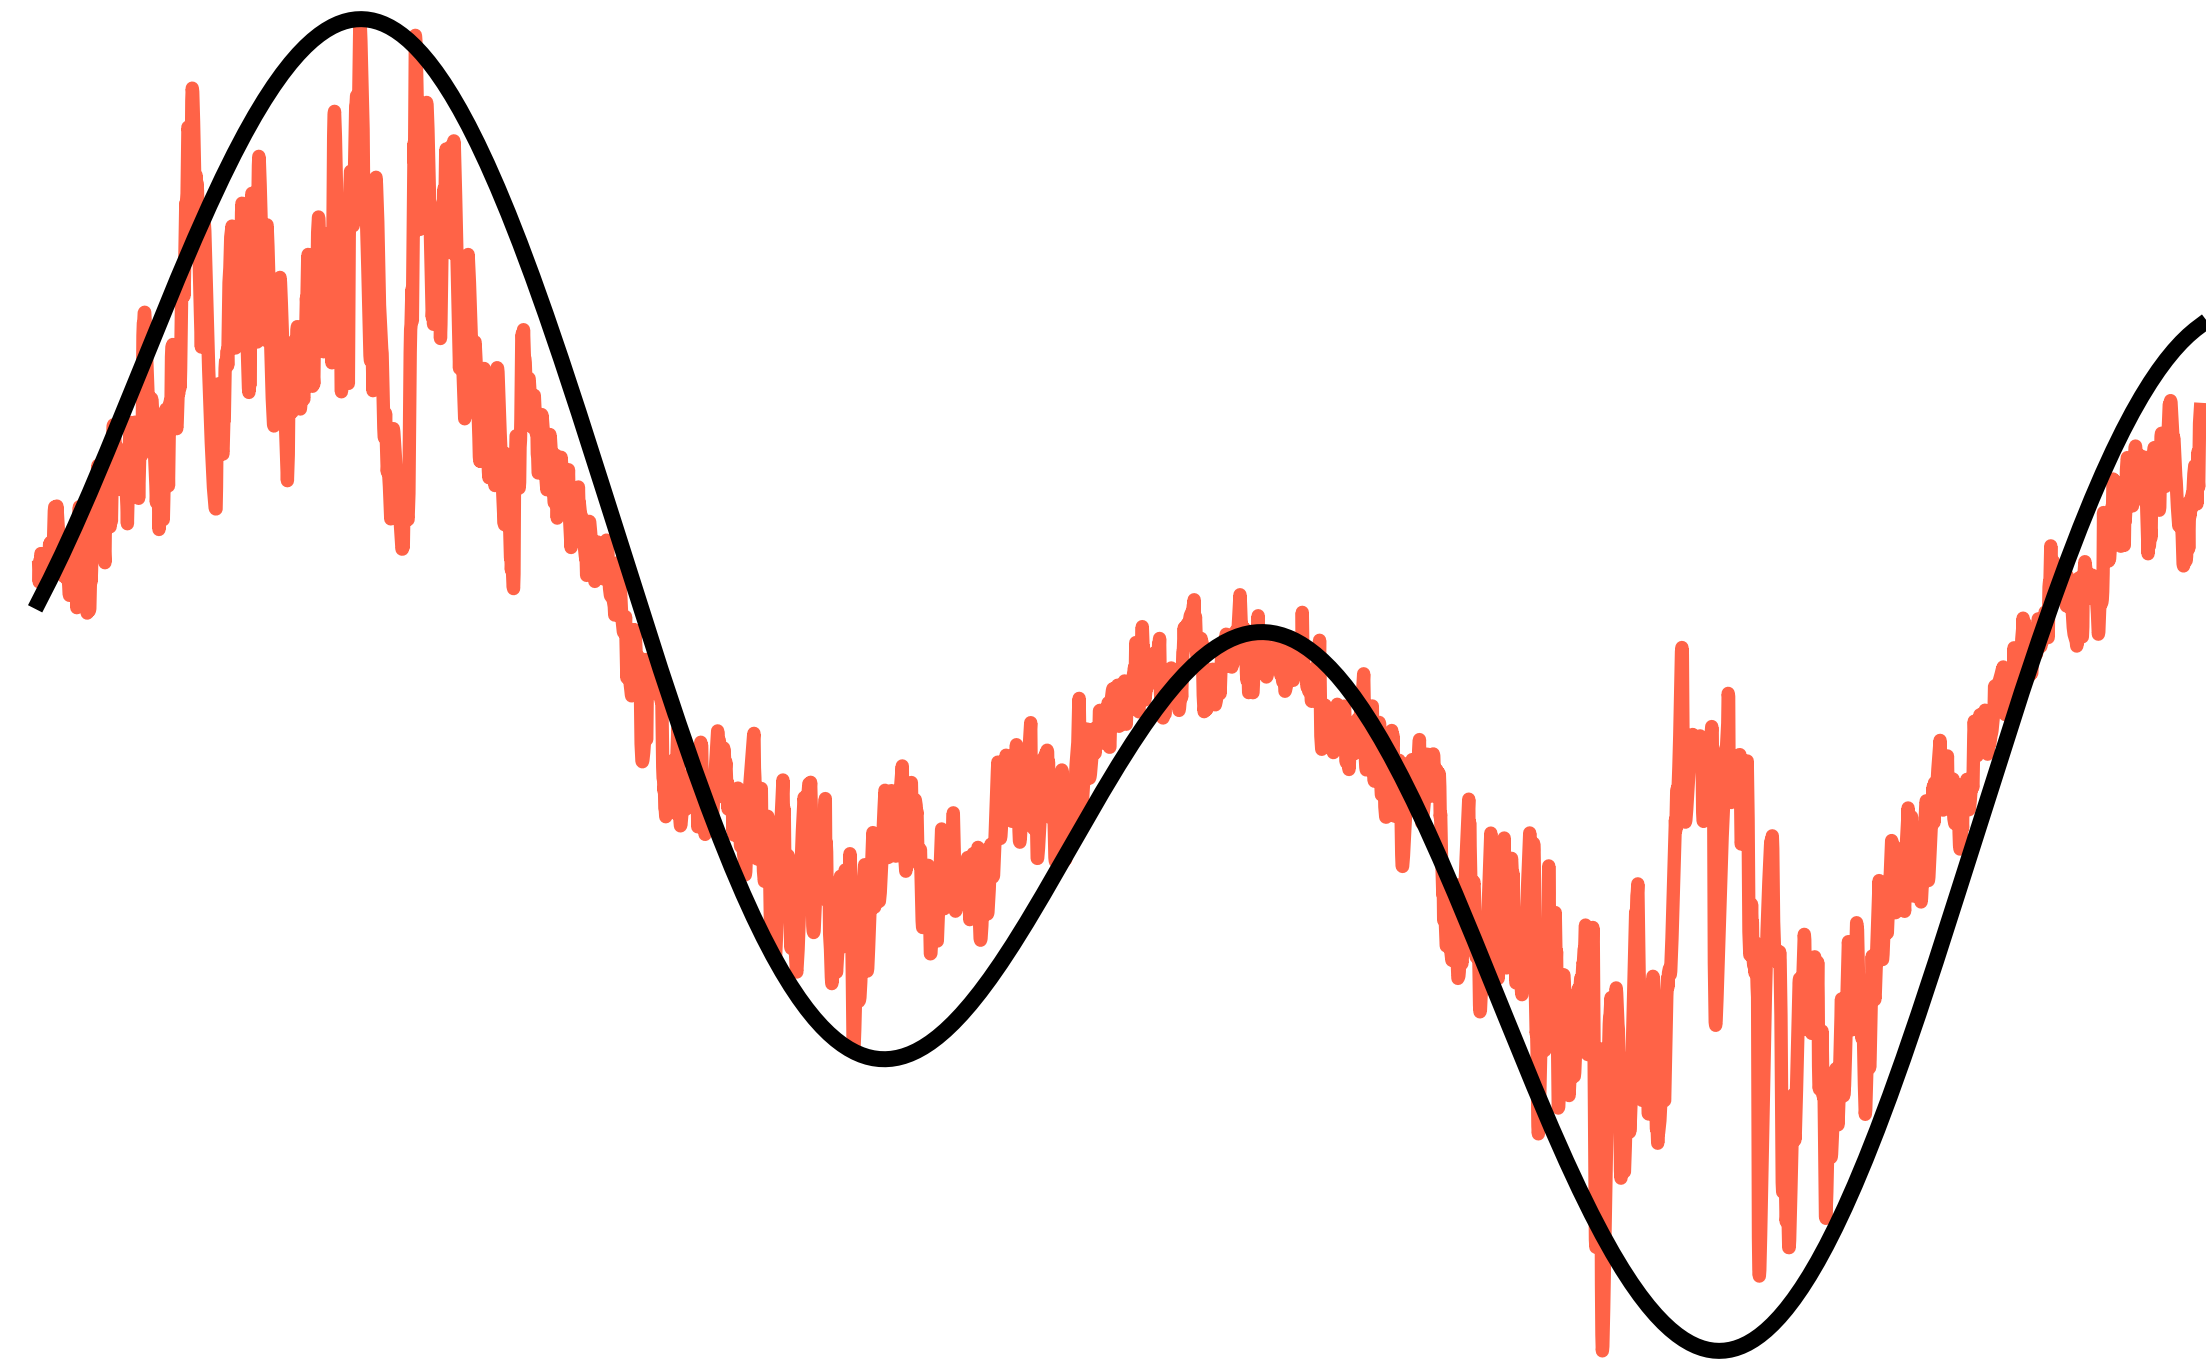

Supplement: fig10-data1 [file elife-77009-fig10-data1-v2.zip]

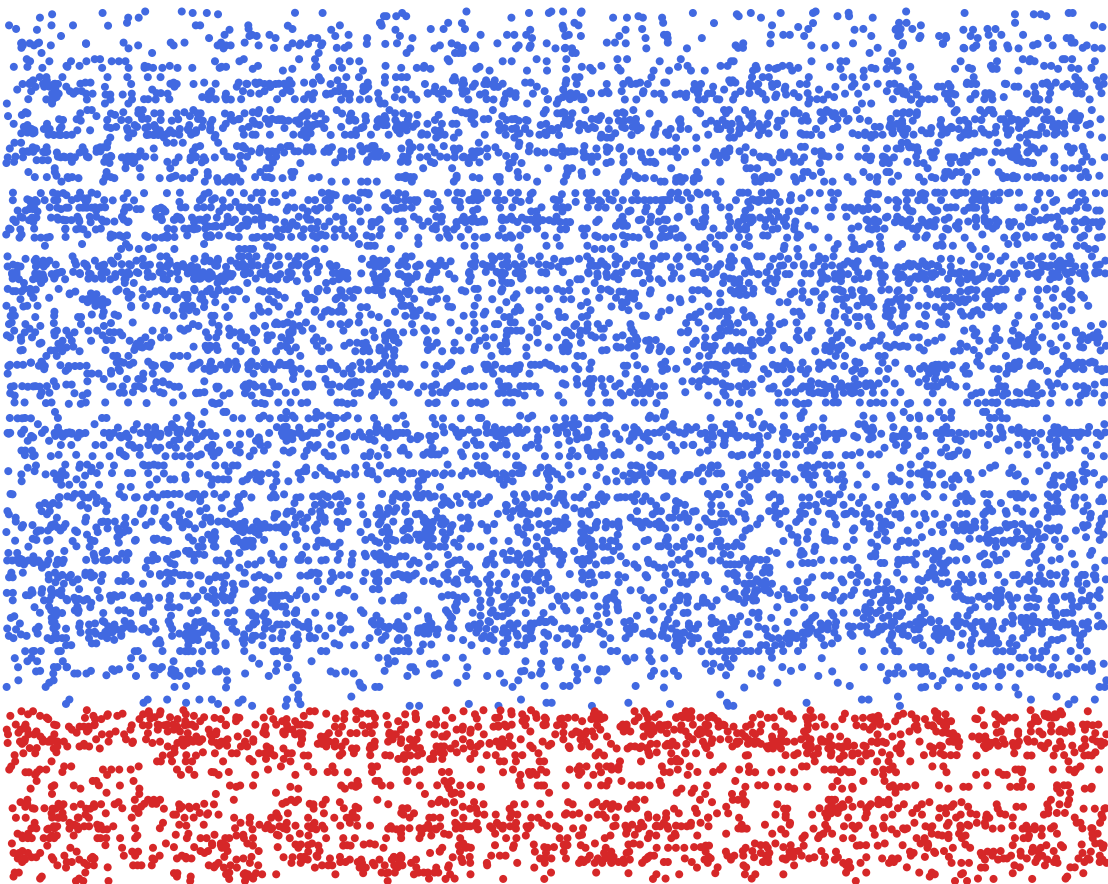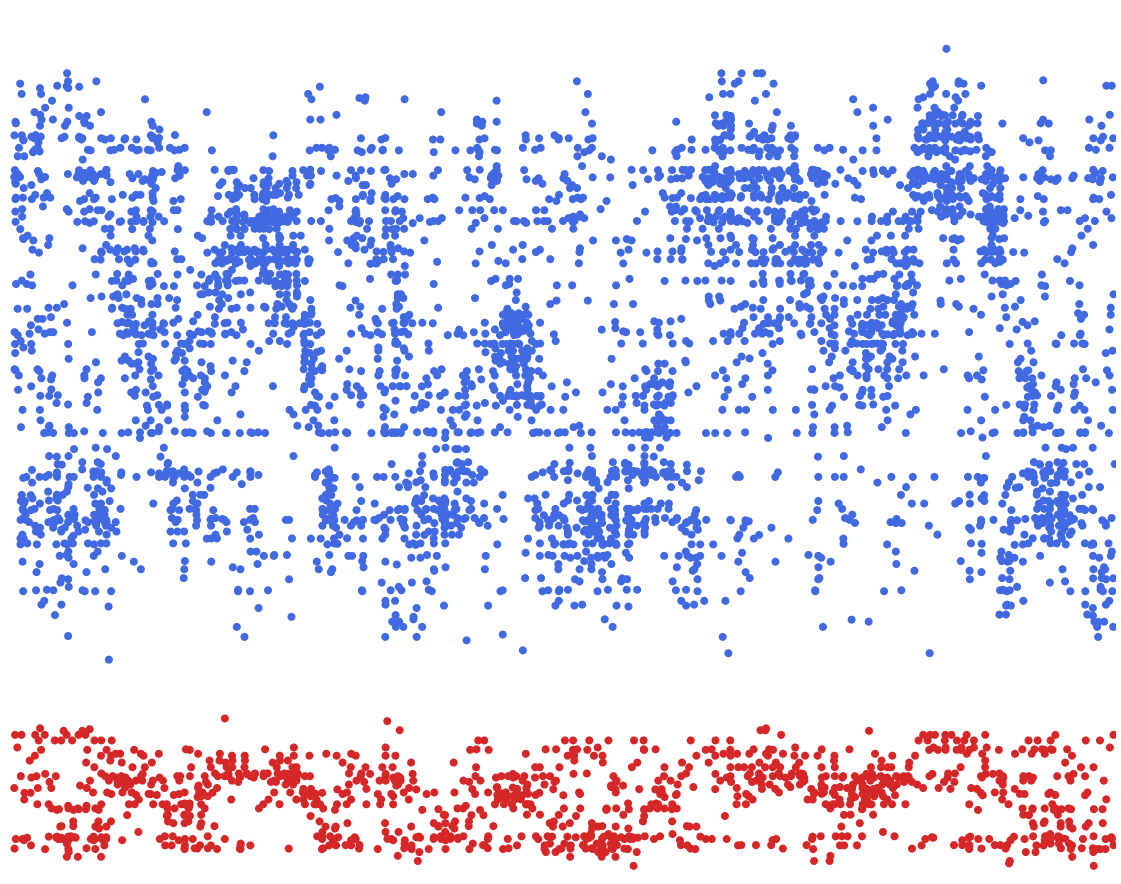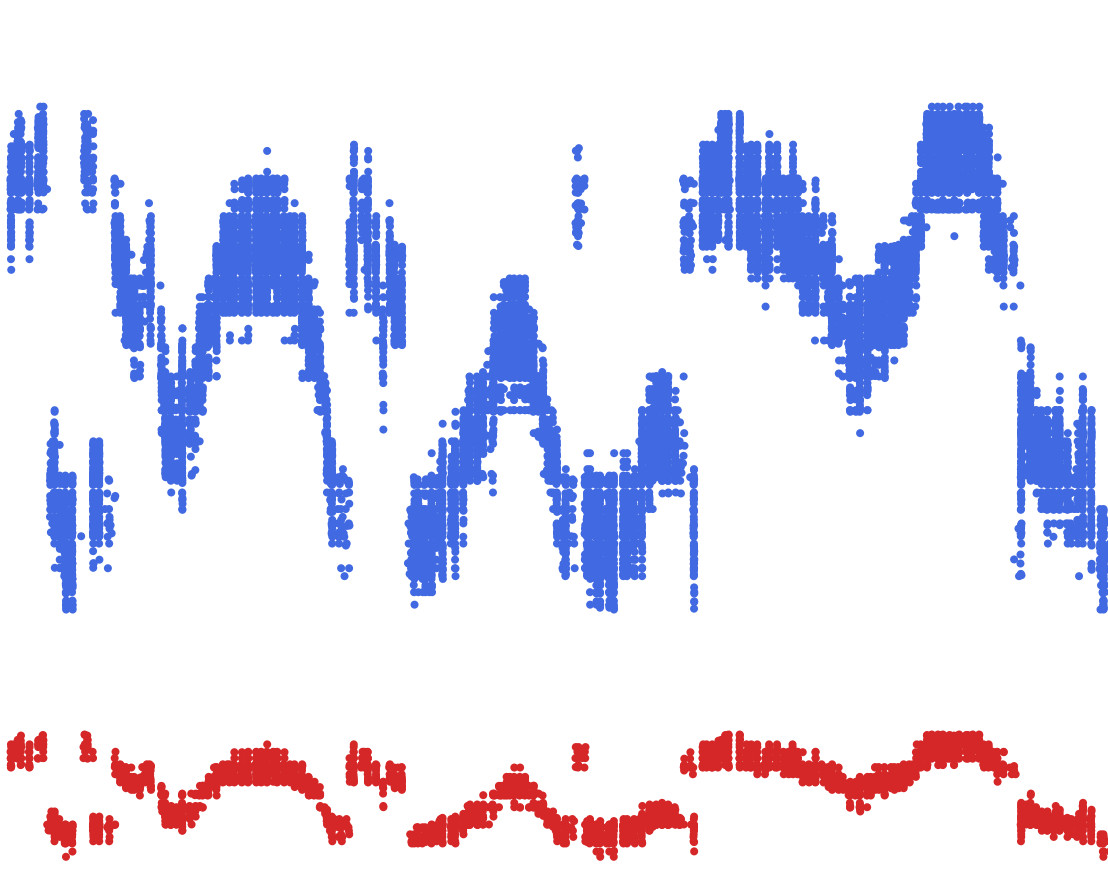

Supplement: fig10-data1 [file elife-77009-fig10-data1-v2.zip]

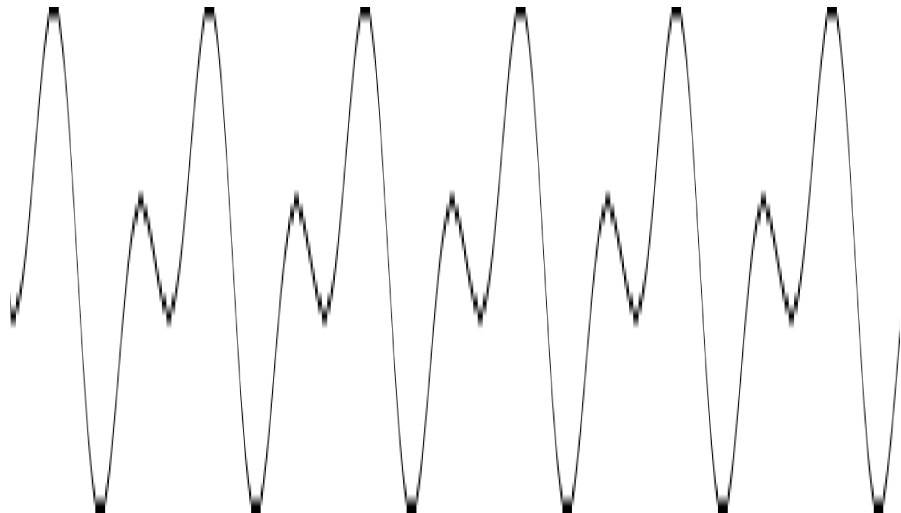

Supplement: fig10-data1 [file elife-77009-fig10-data1-v2.zip]

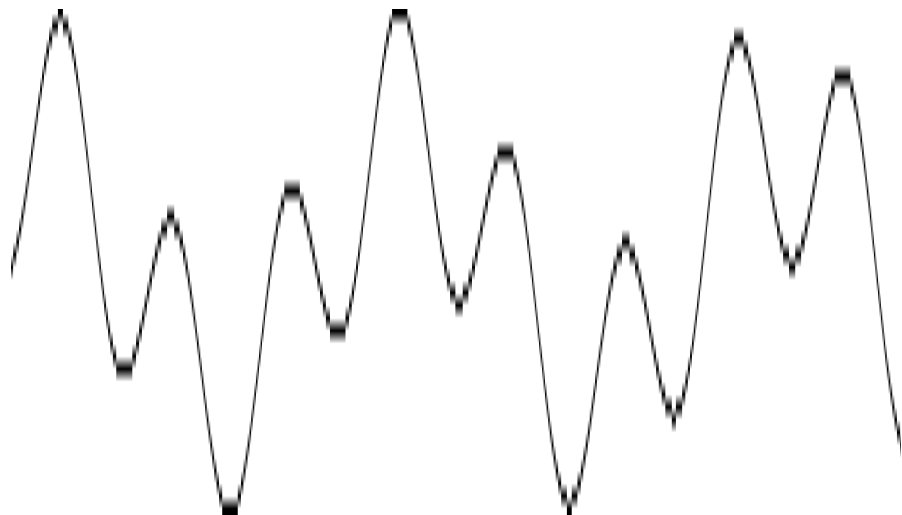

Supplement: fig10-data1 [file elife-77009-fig10-data1-v2.zip]

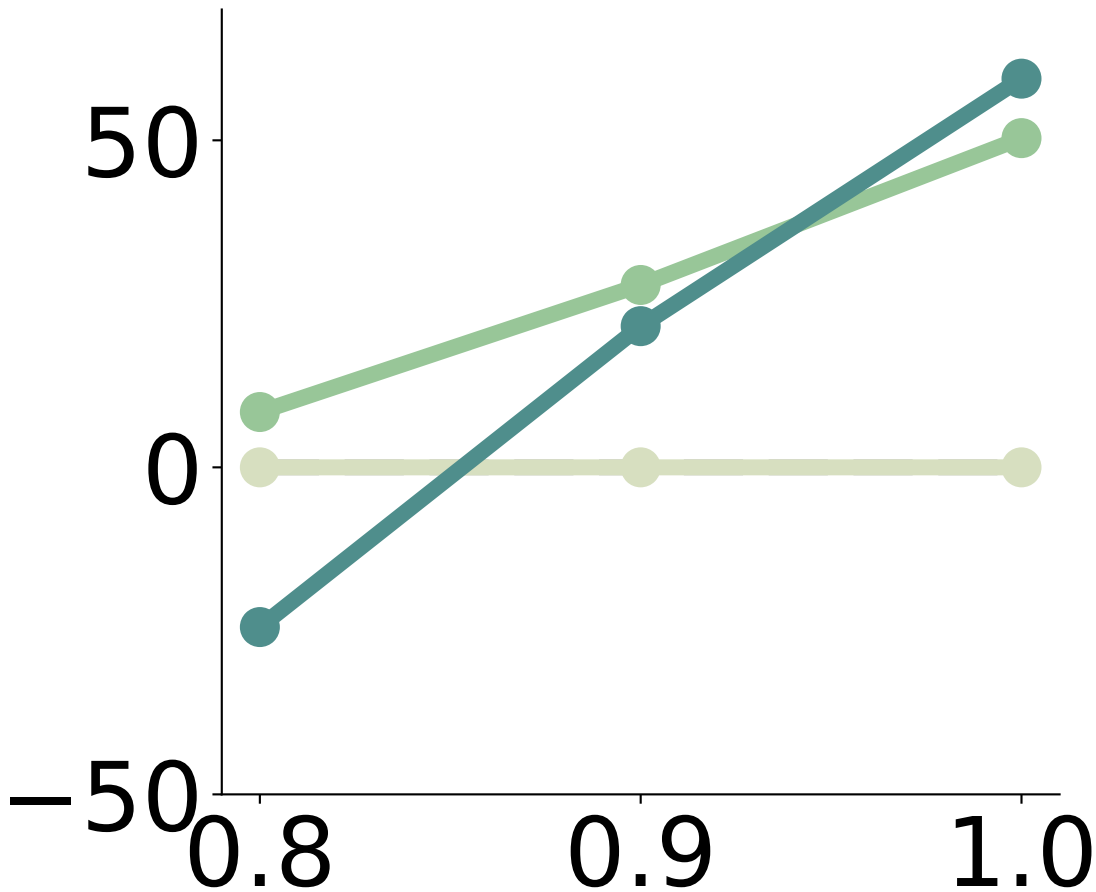

Supplement: fig10-data1 [file elife-77009-fig10-data1-v2.zip]

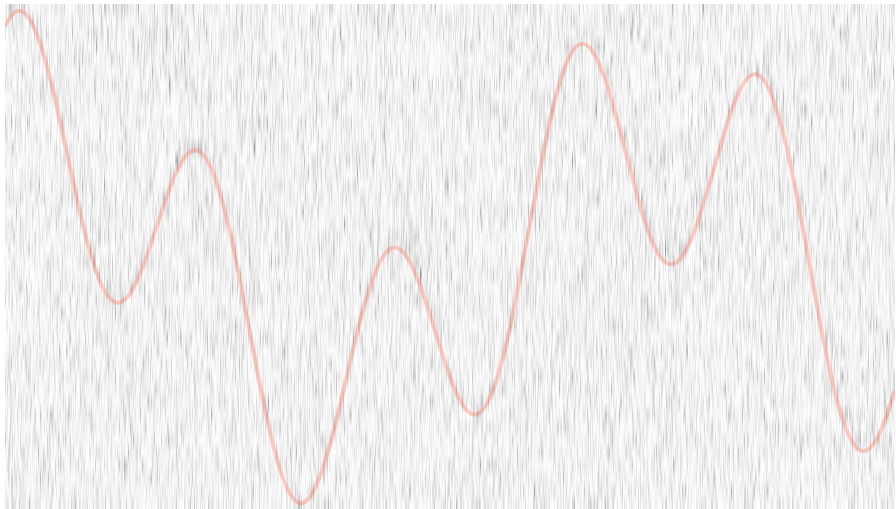

Supplement: fig10-data1 [file elife-77009-fig10-data1-v2.zip]

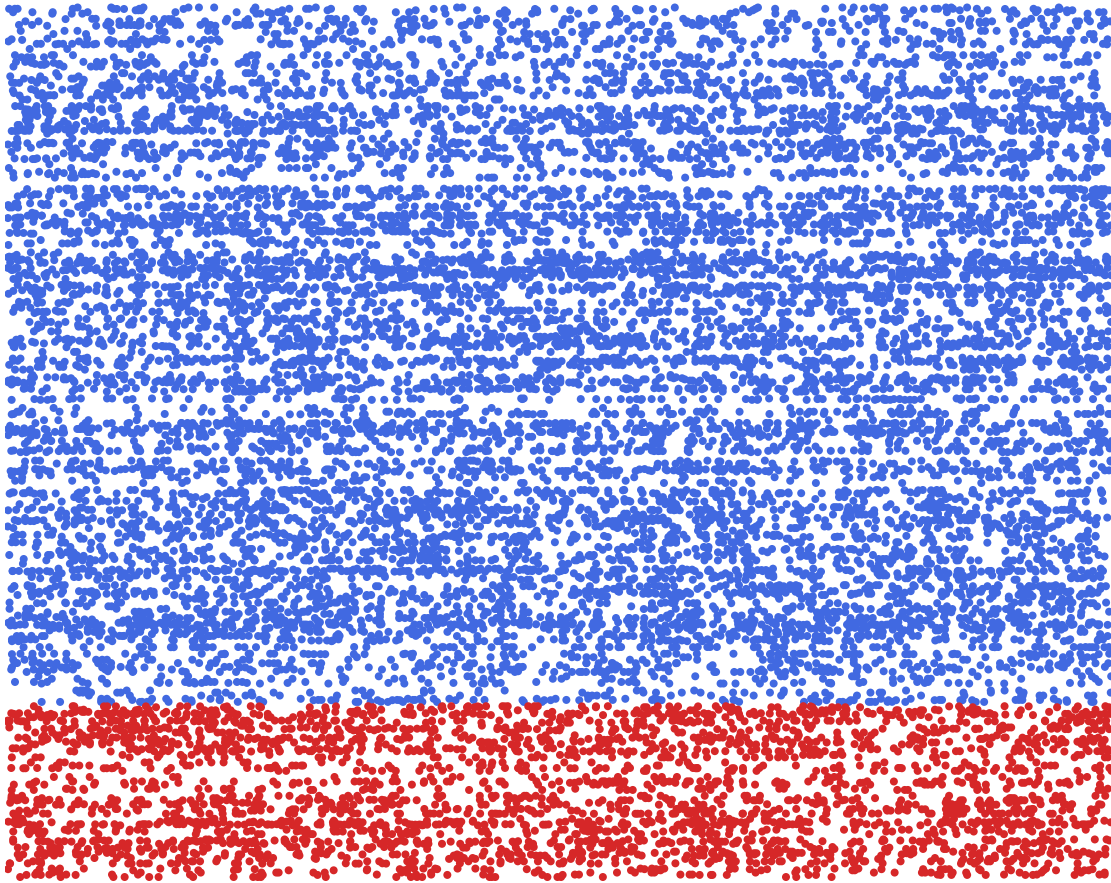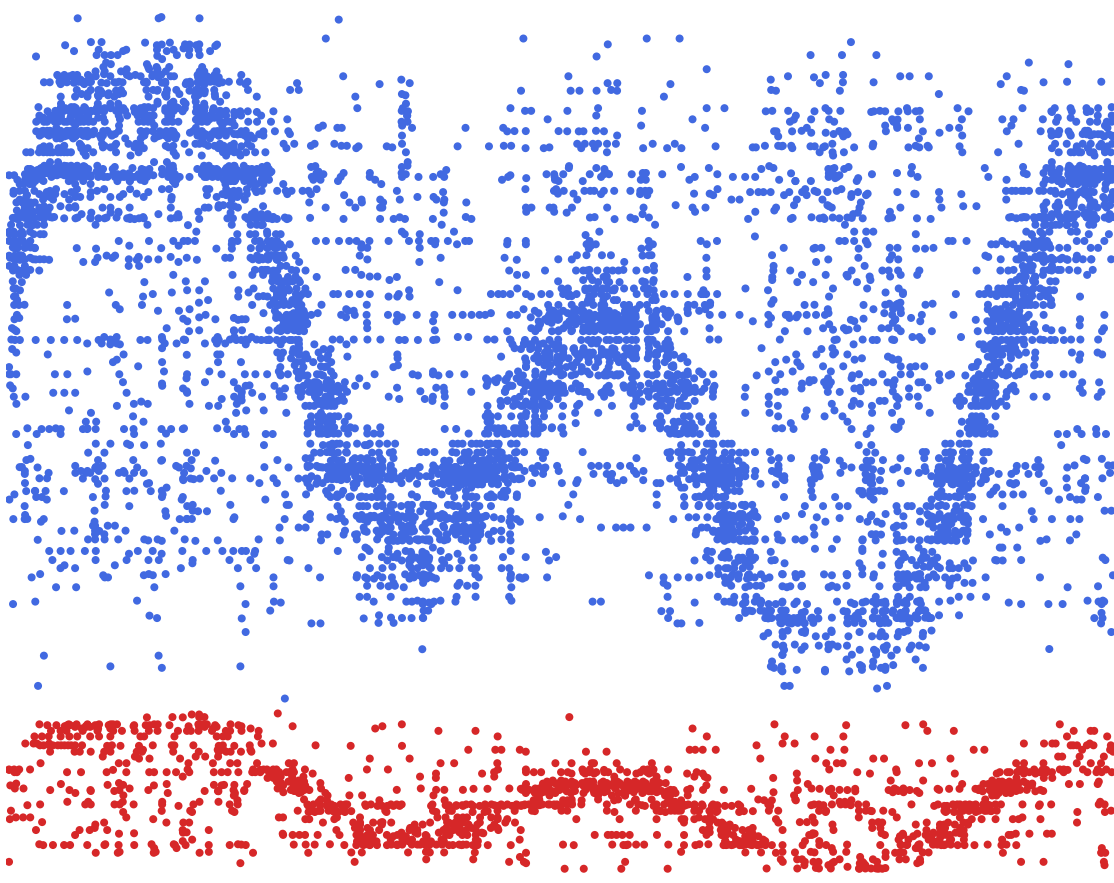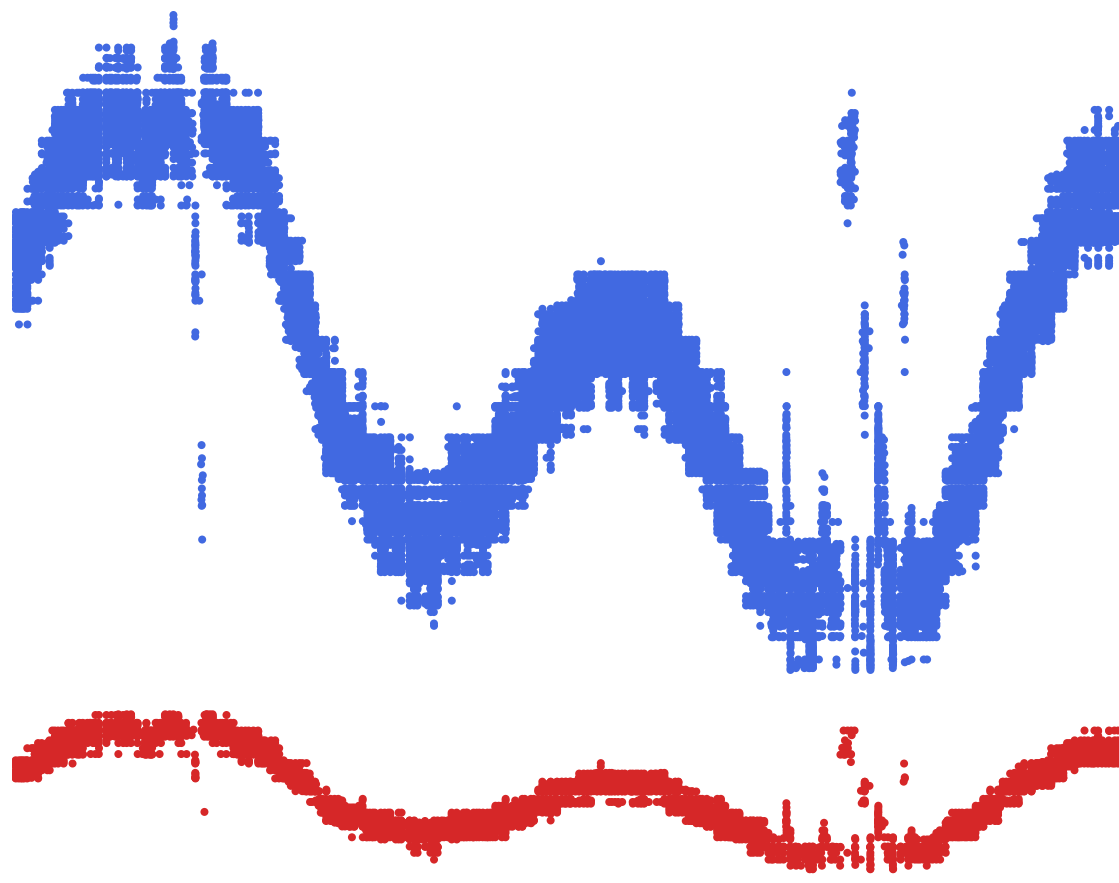

Supplement: fig10-data1 [file elife-77009-fig10-data1-v2.zip]

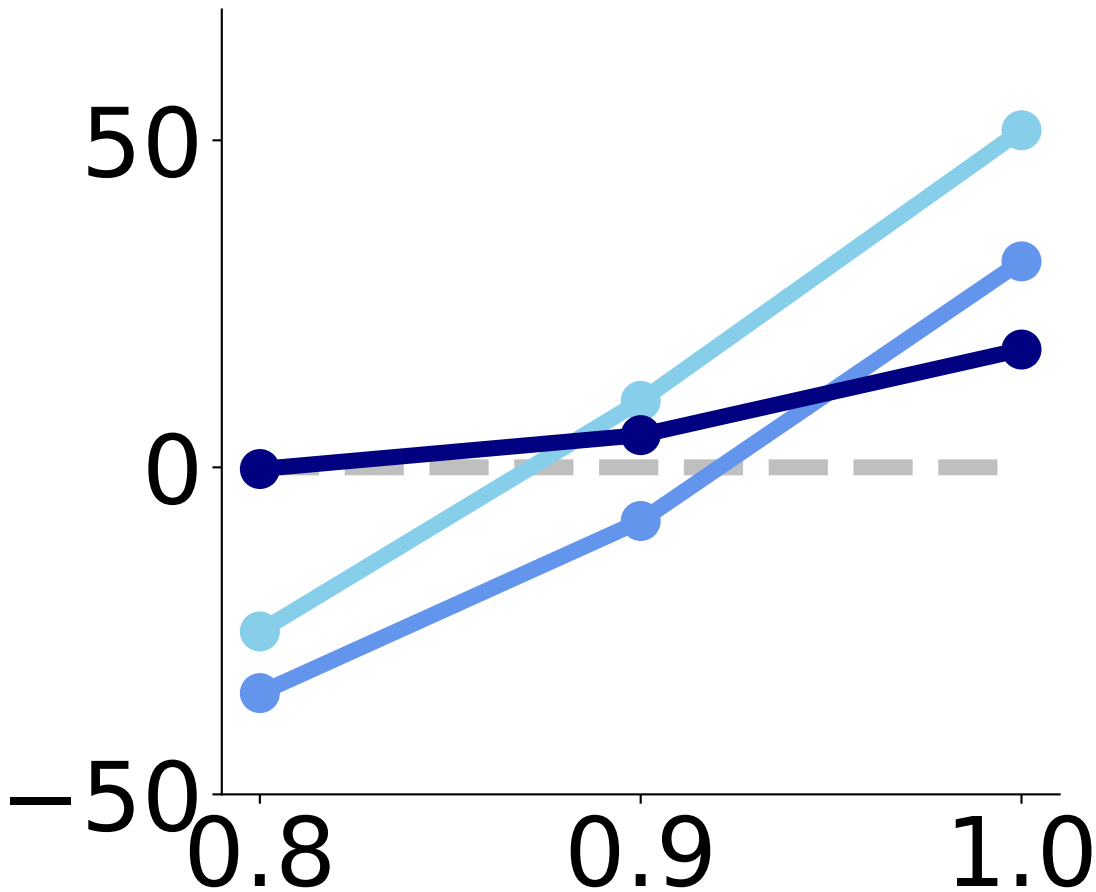

Supplement: fig10-data1 [file elife-77009-fig10-data1-v2.zip]

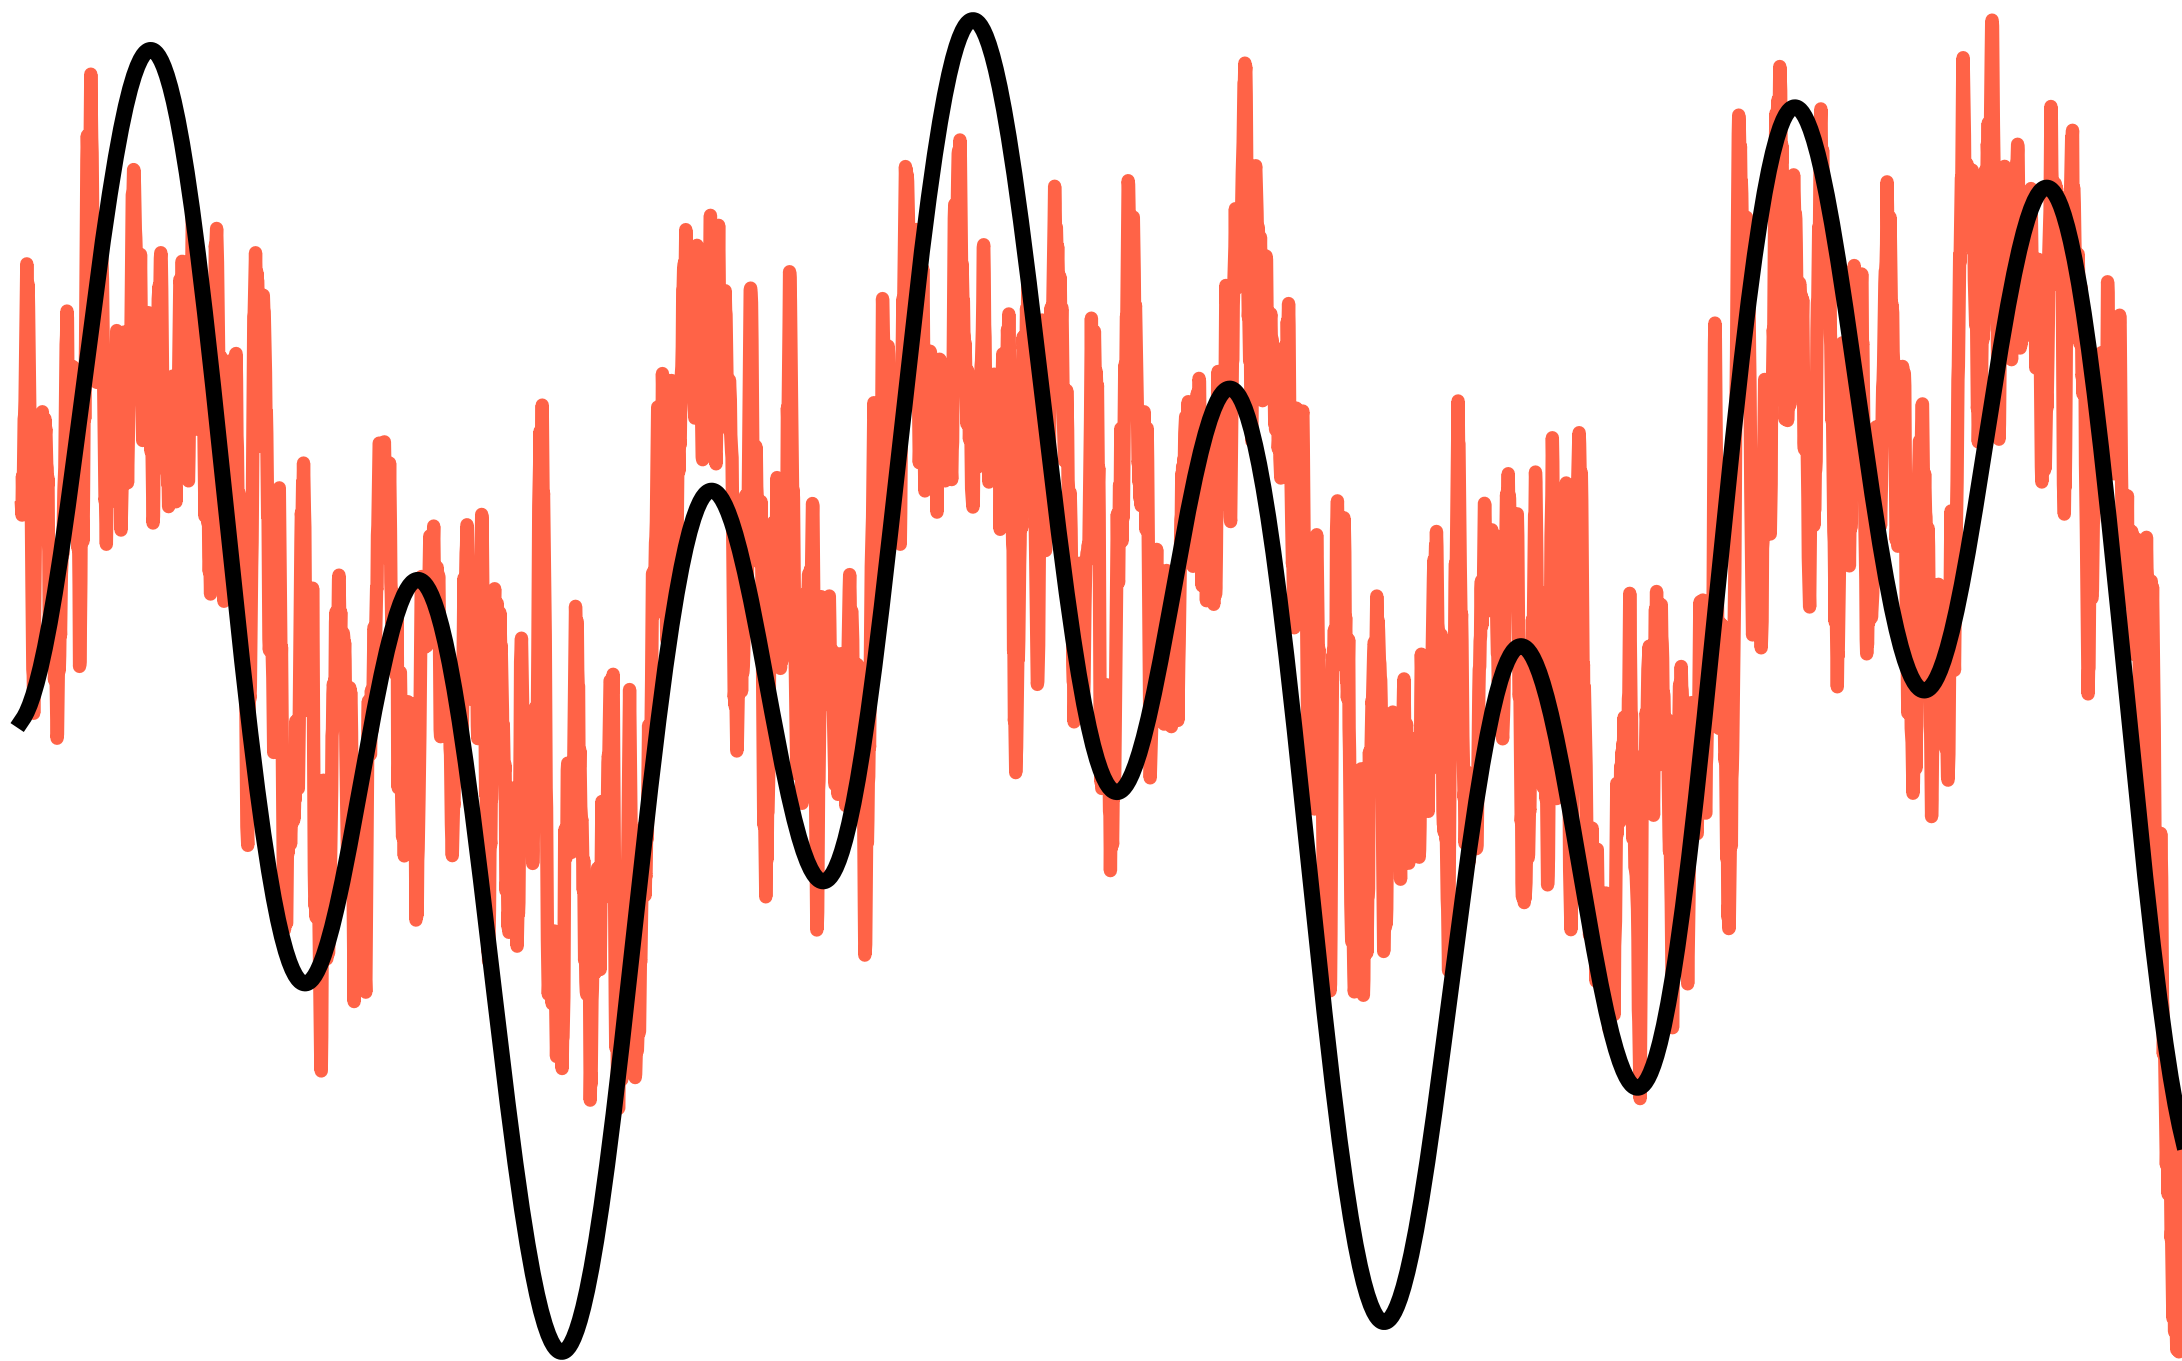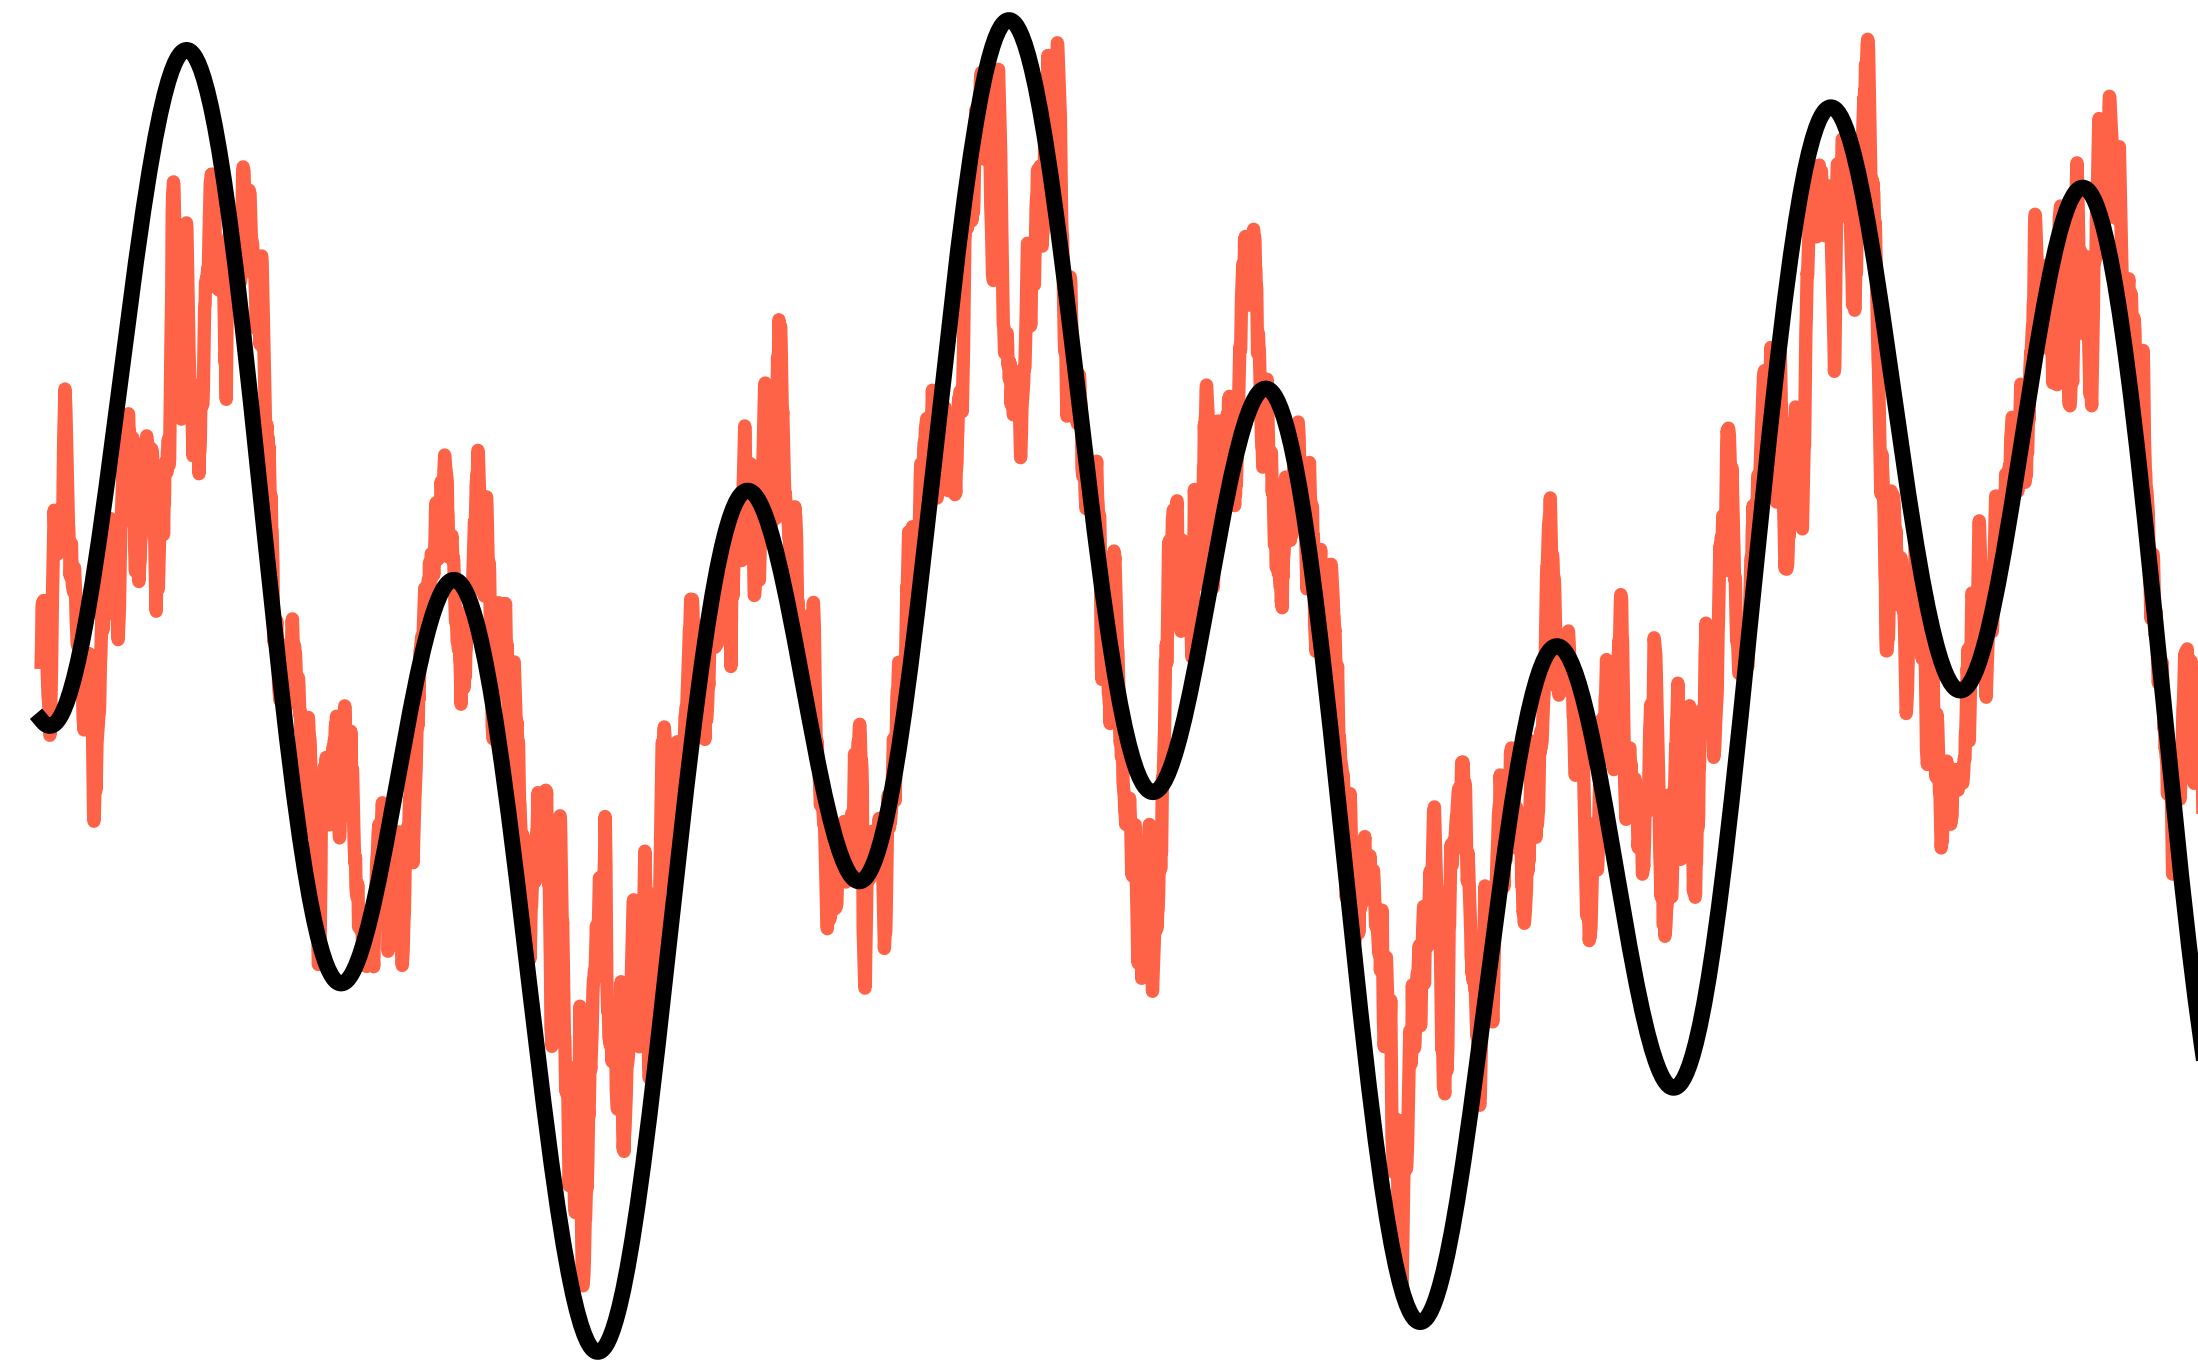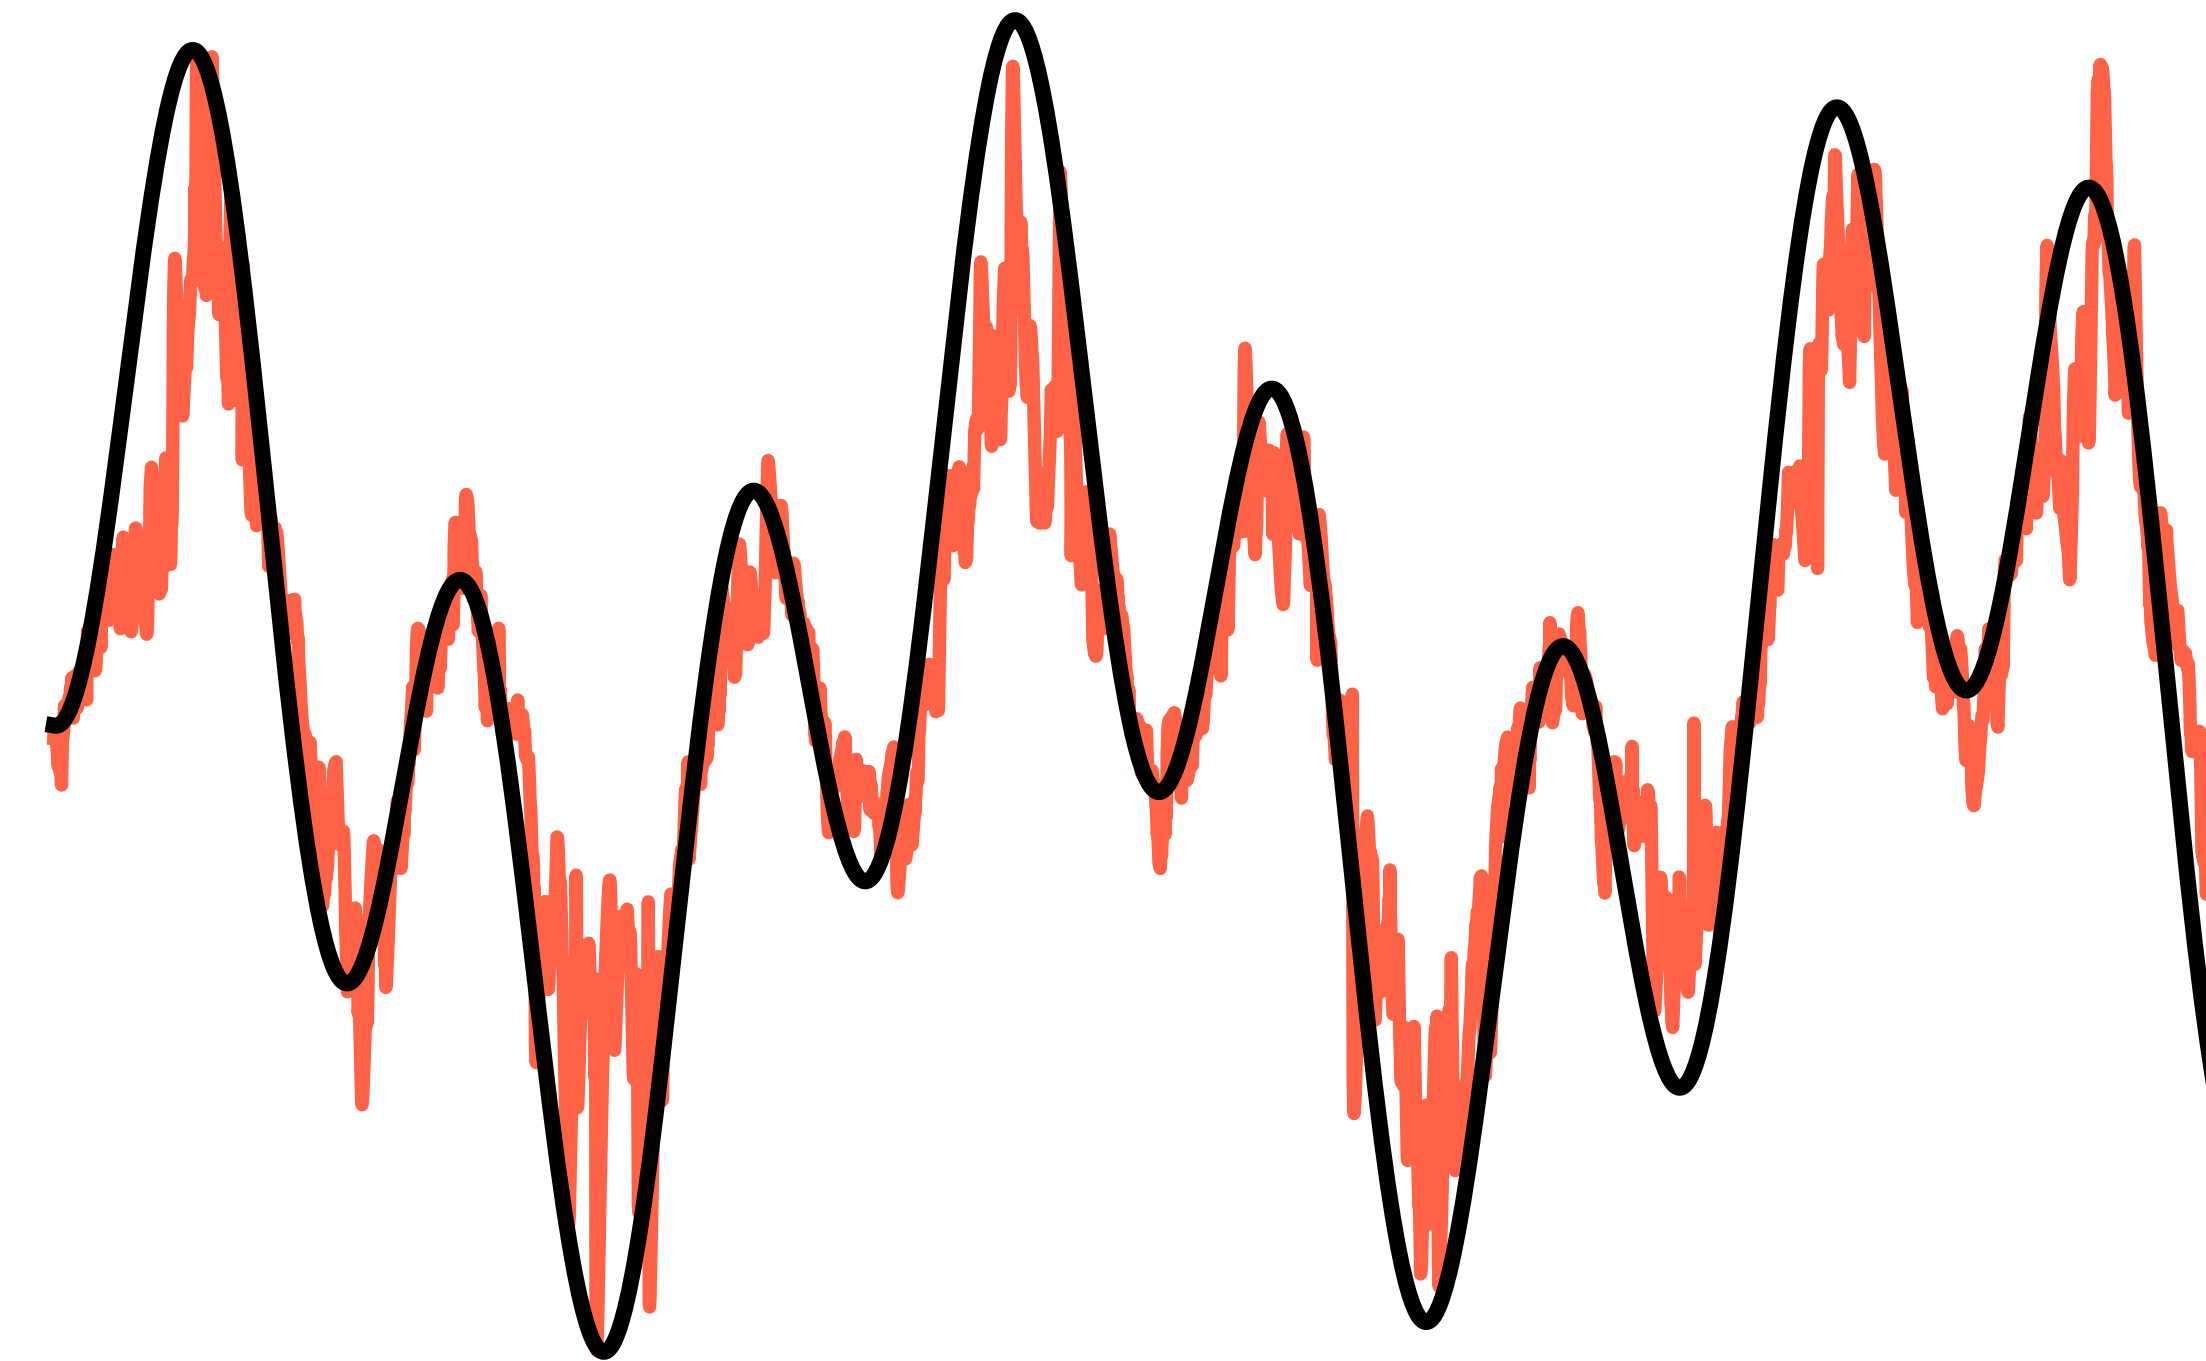

Supplement: fig10-data1 [file elife-77009-fig10-data1-v2.zip]

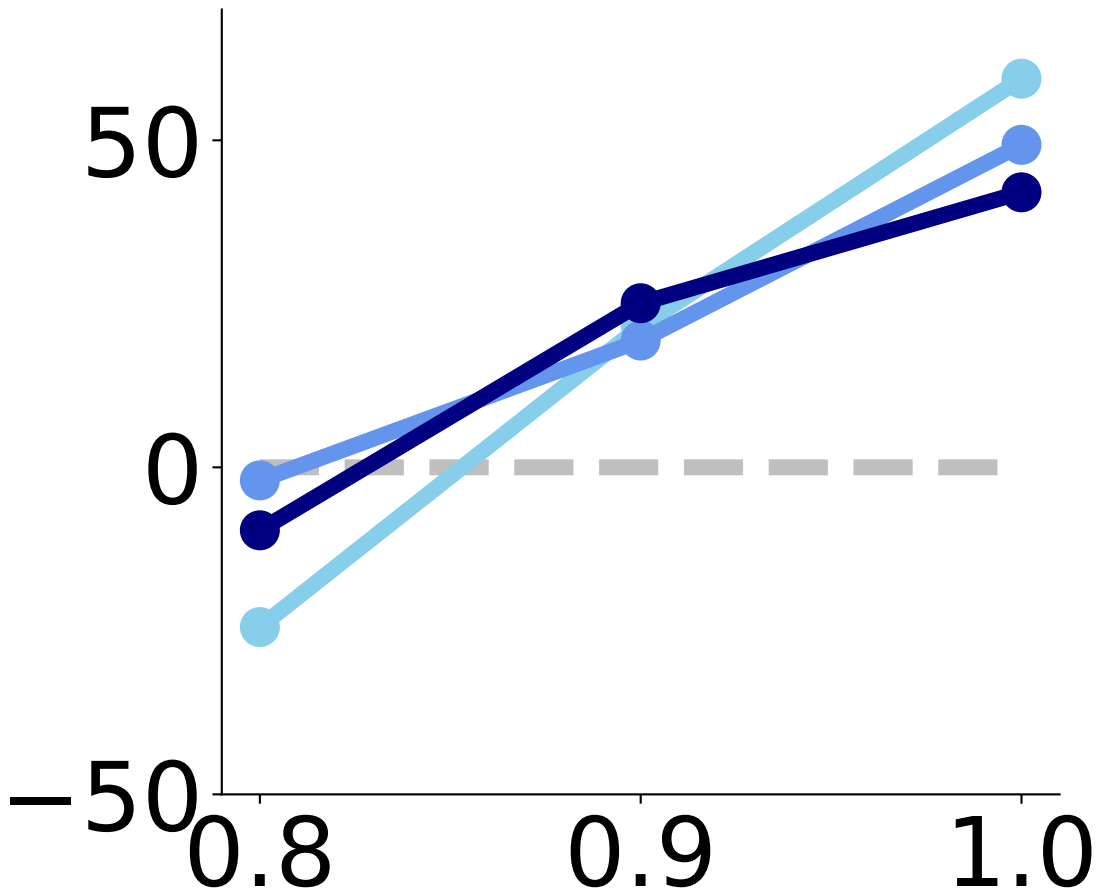

Supplement: fig10-data1 [file elife-77009-fig10-data1-v2.zip]

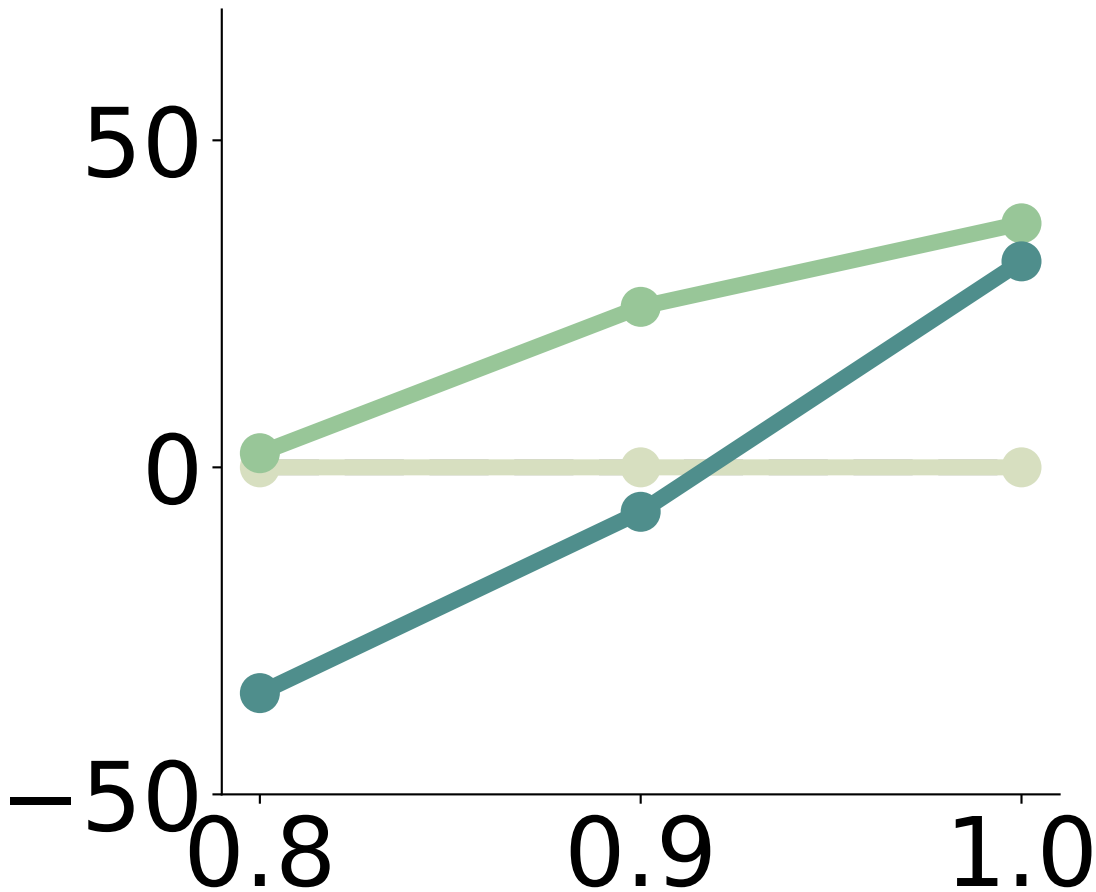

Supplement: fig10-data1 [file elife-77009-fig10-data1-v2.zip]

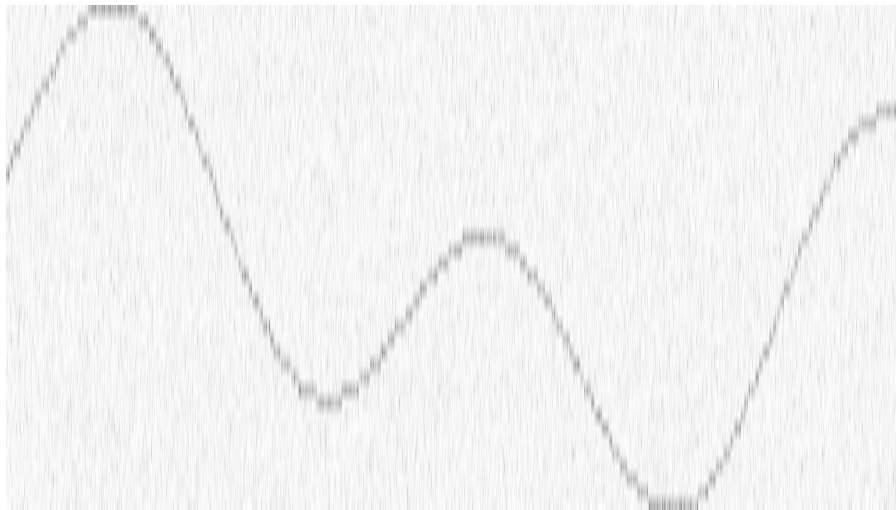

Supplement: fig10-data1 [file elife-77009-fig10-data1-v2.zip]

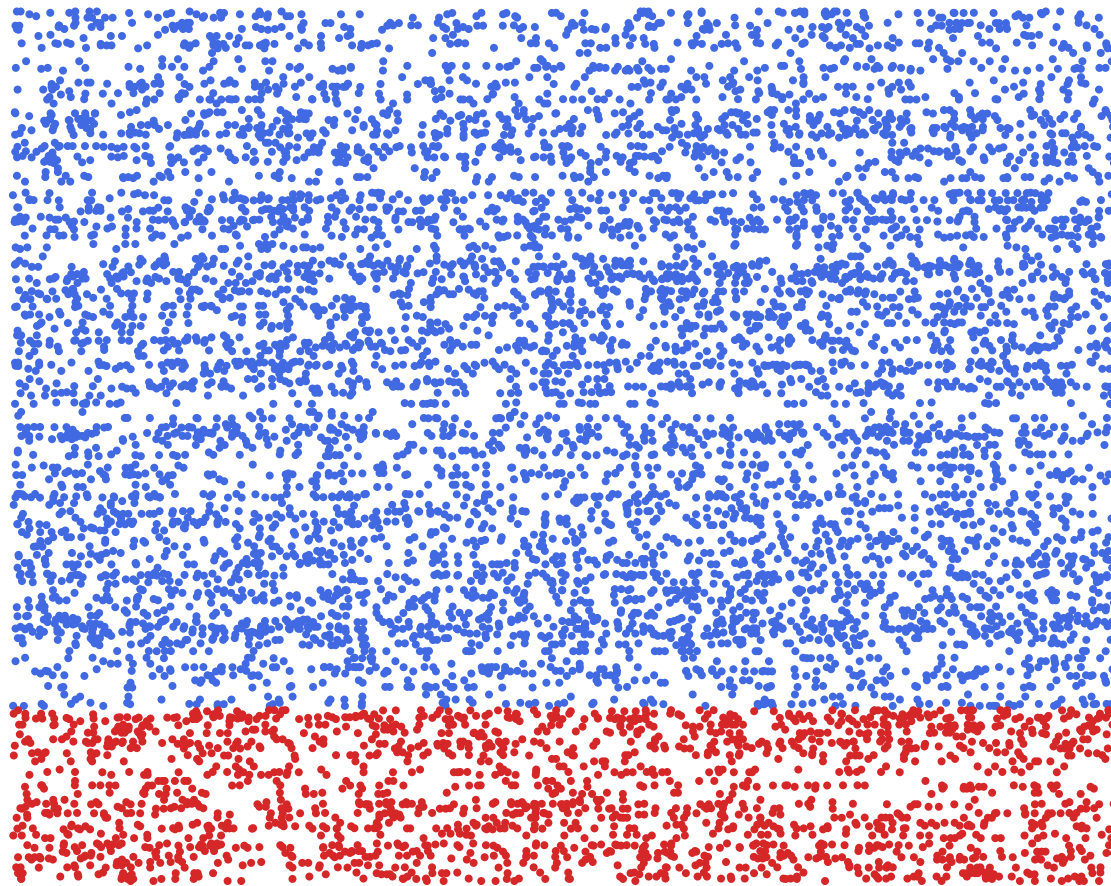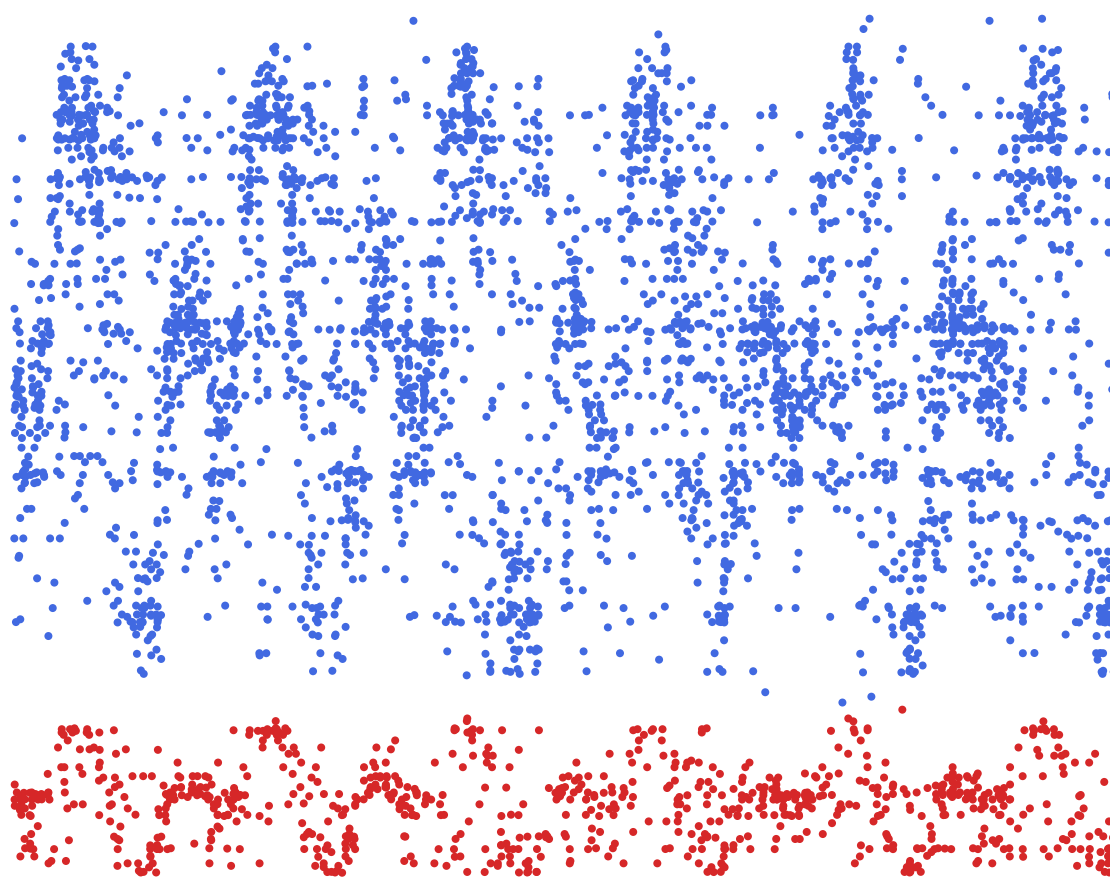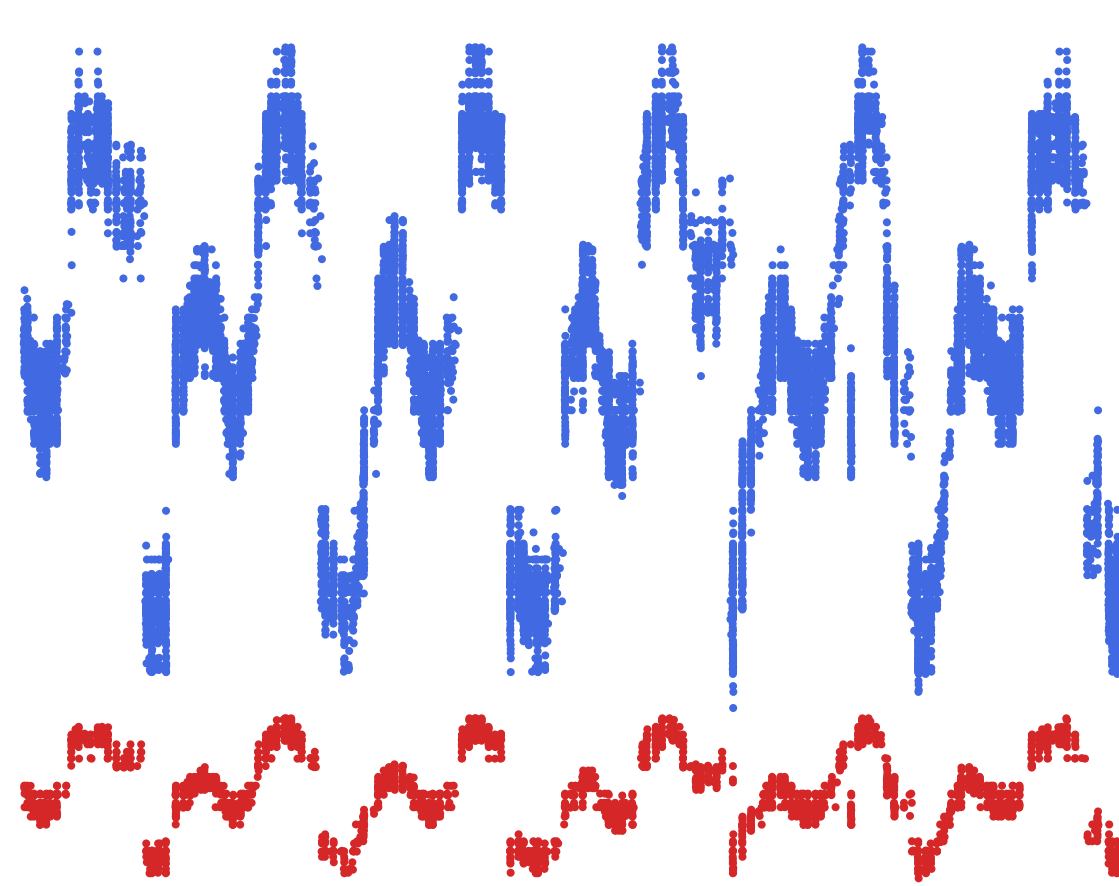

Supplement: fig10-data1 [file elife-77009-fig10-data1-v2.zip]

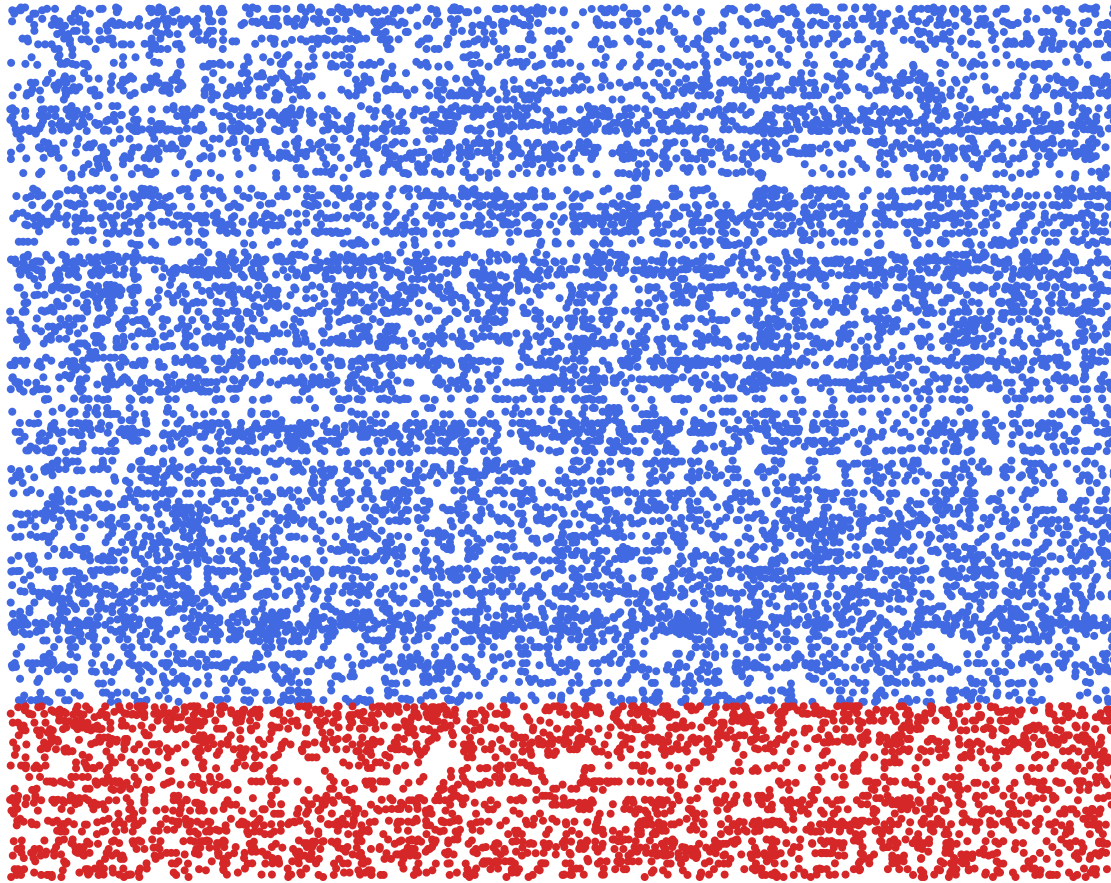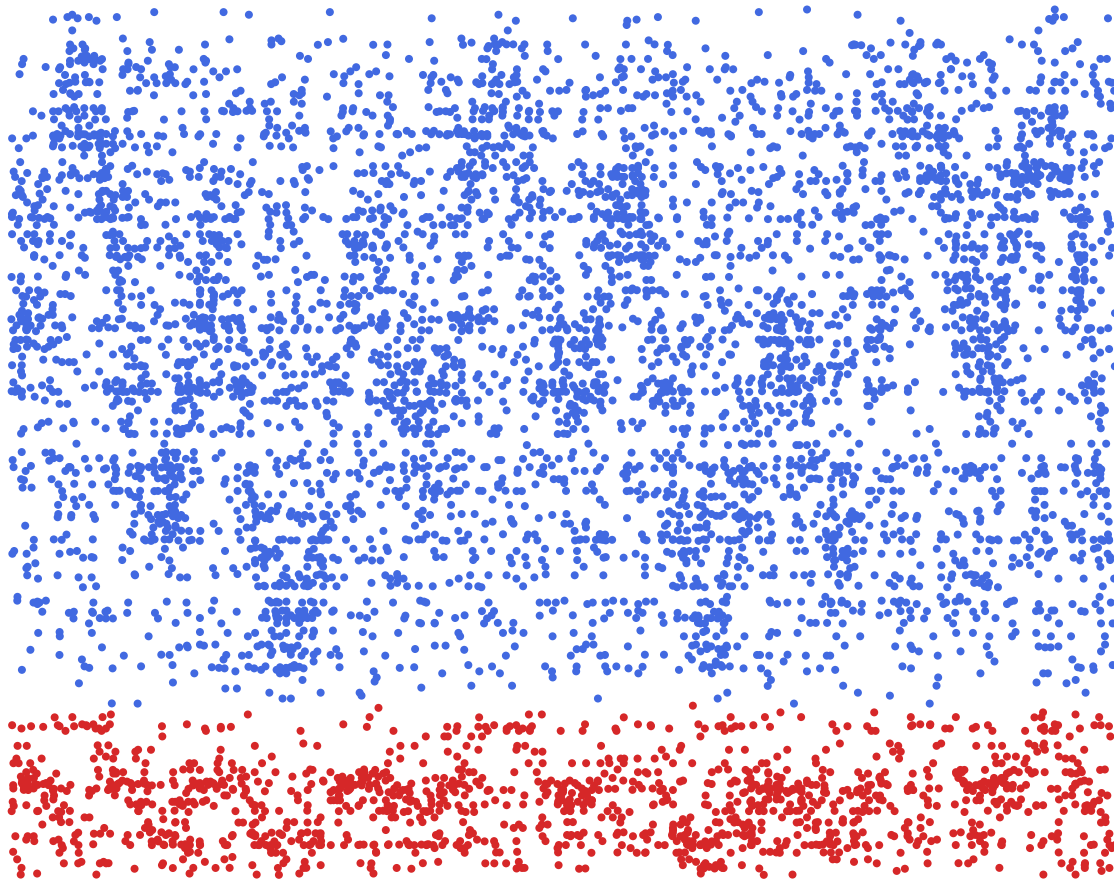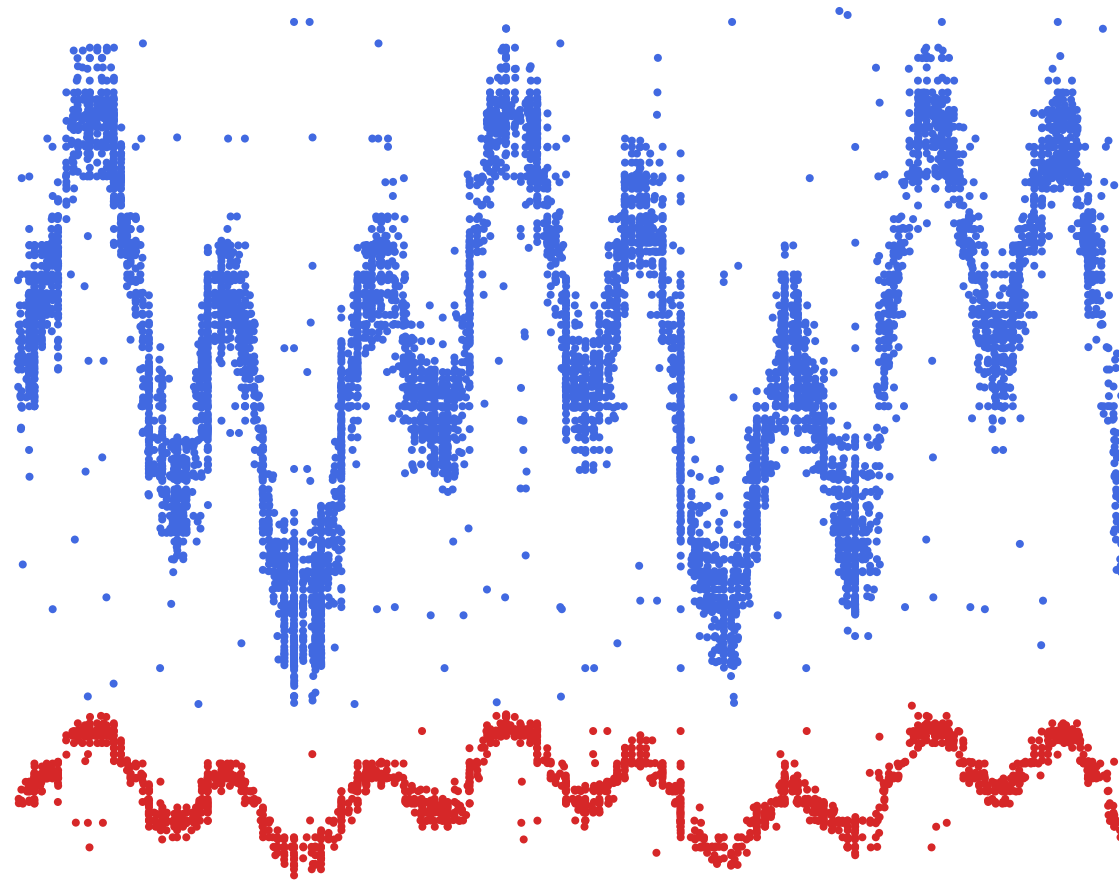

Supplement: fig10-data1 [file elife-77009-fig10-data1-v2.zip]

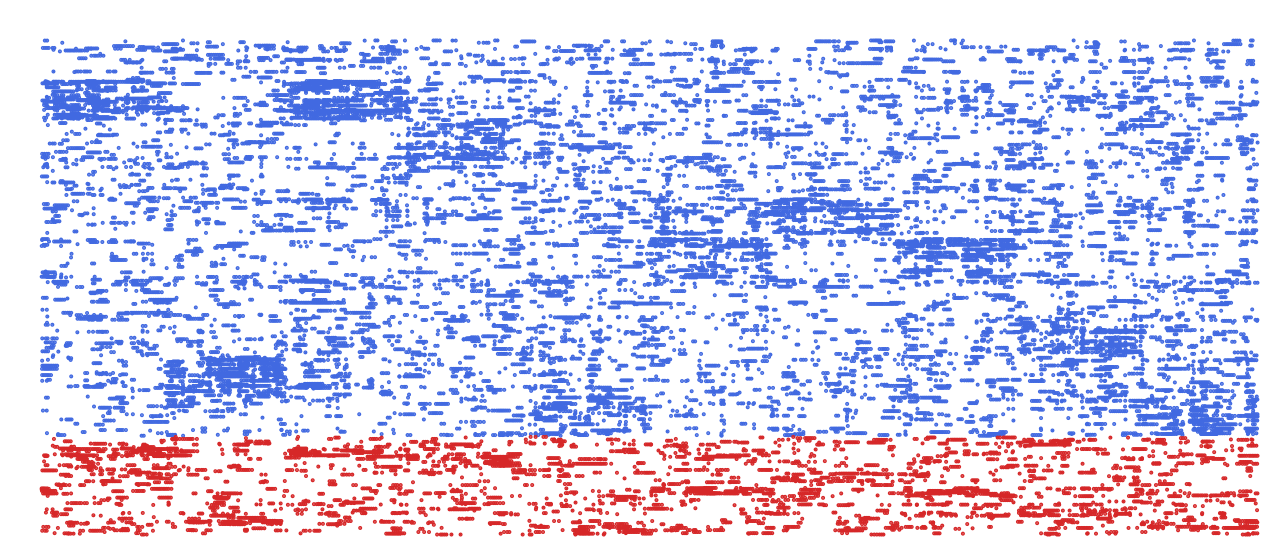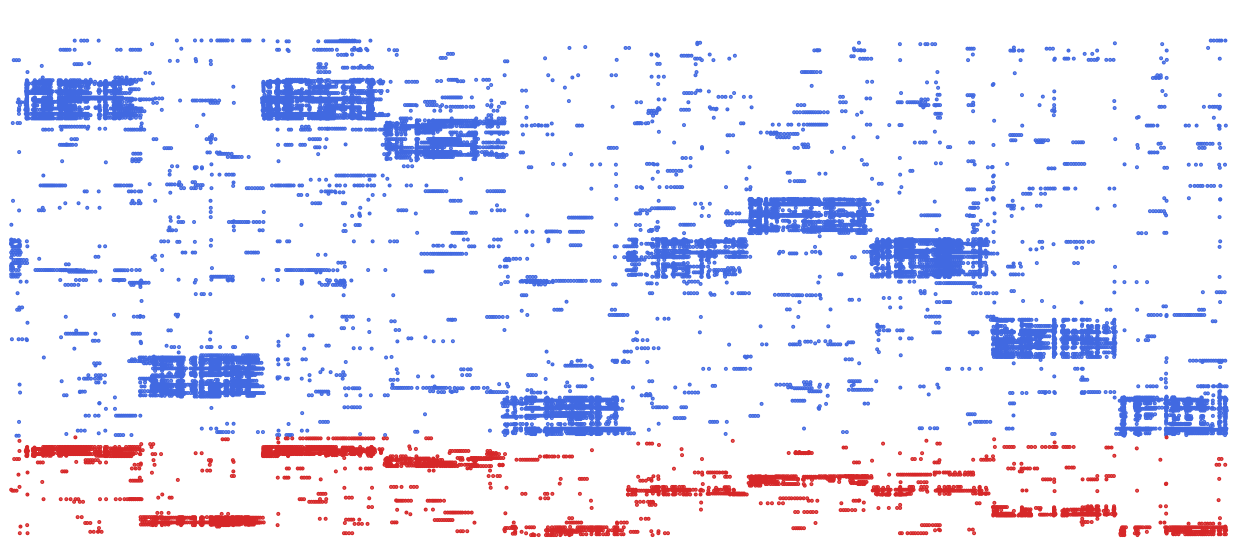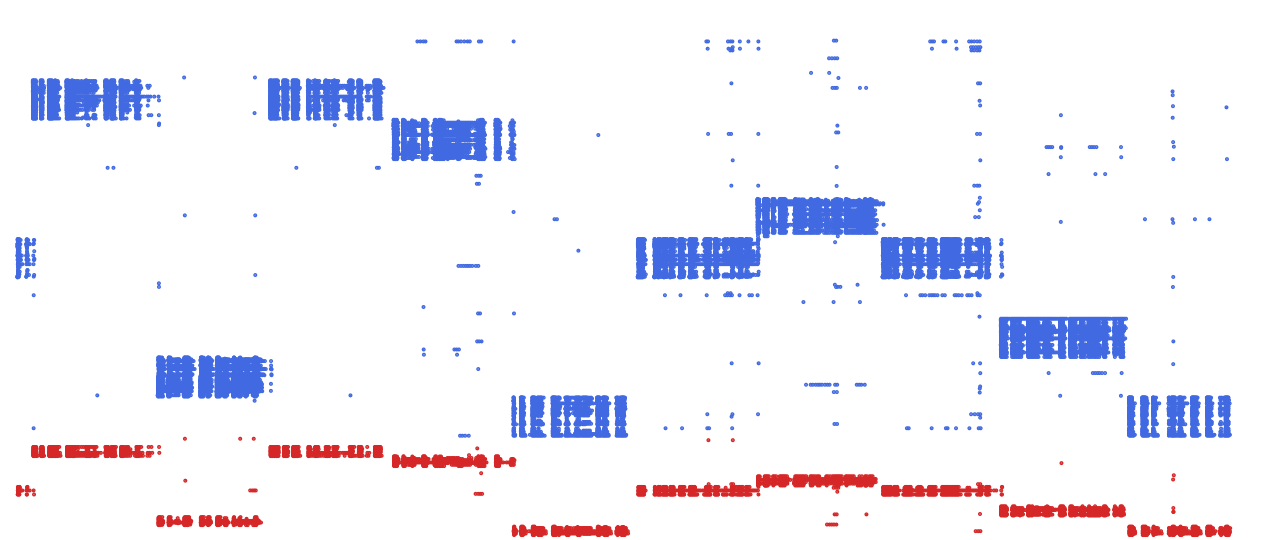

Supplement: fig5-data1 [file elife-77009-fig5-data1-v2.zip]

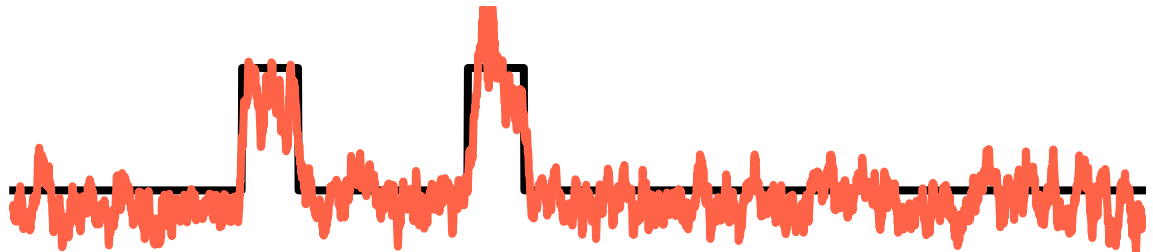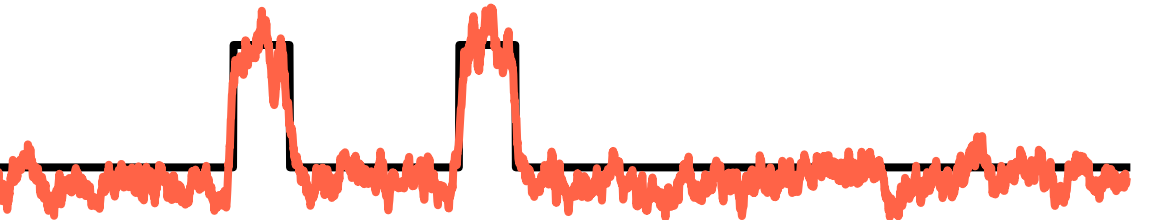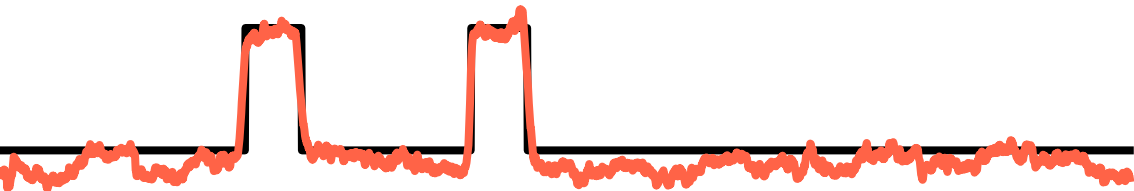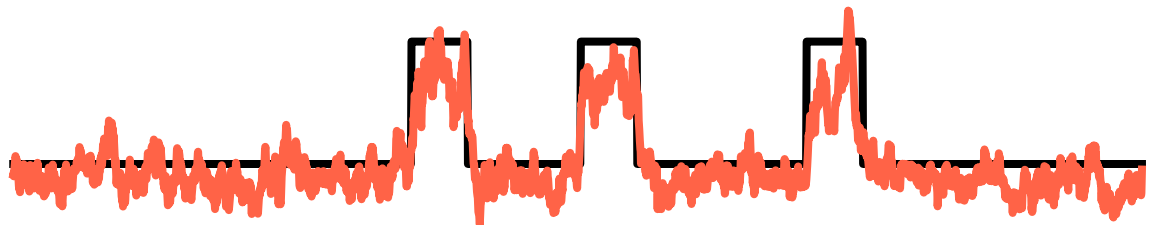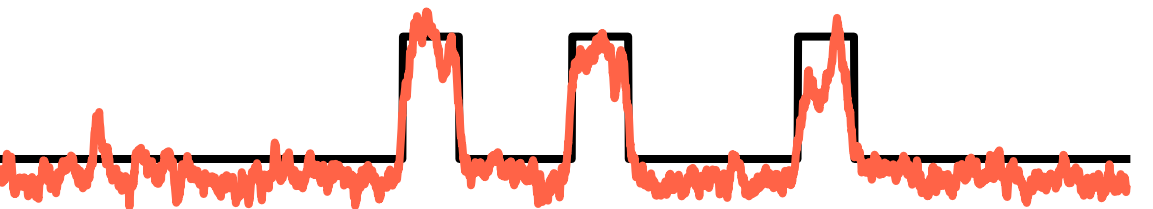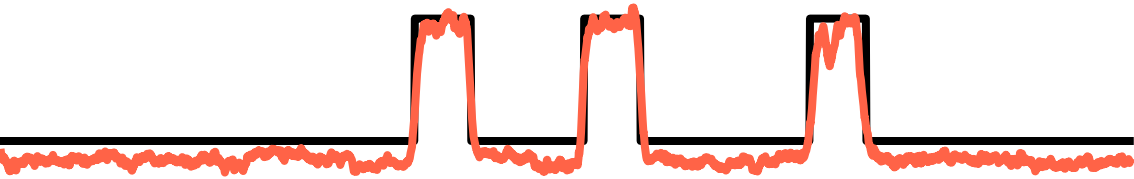

Supplement: fig5-data1 [file elife-77009-fig5-data1-v2.zip]

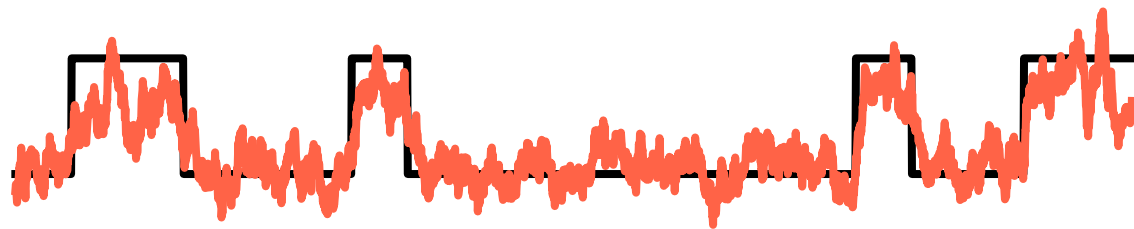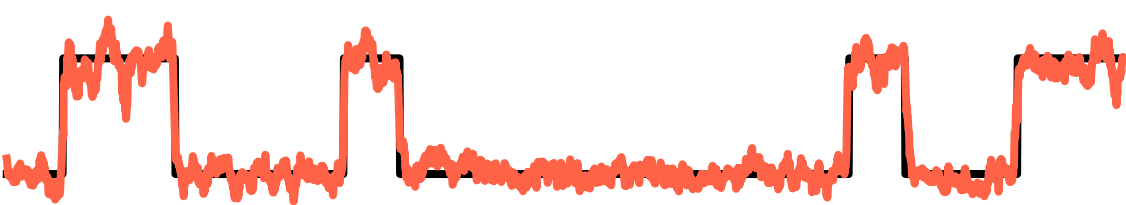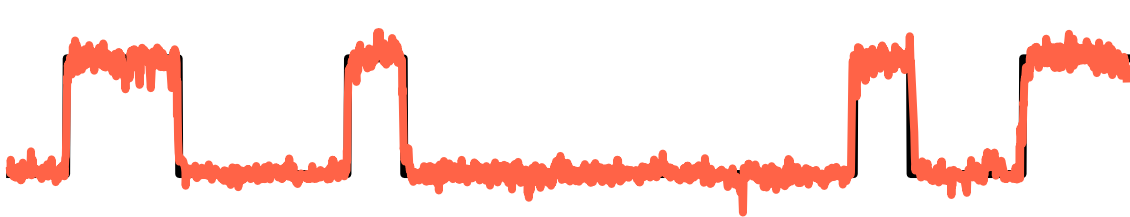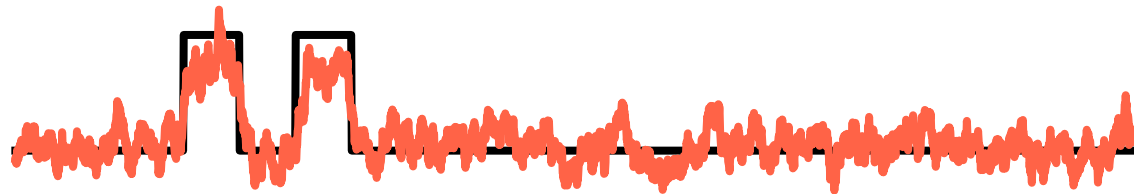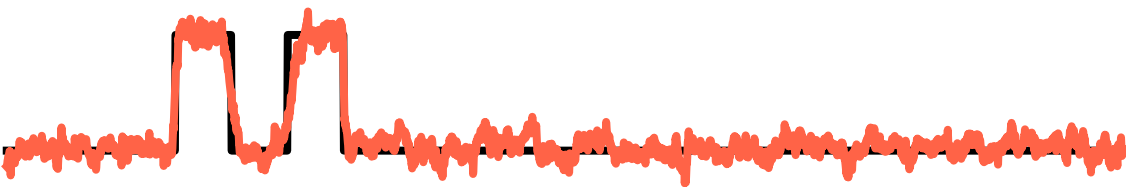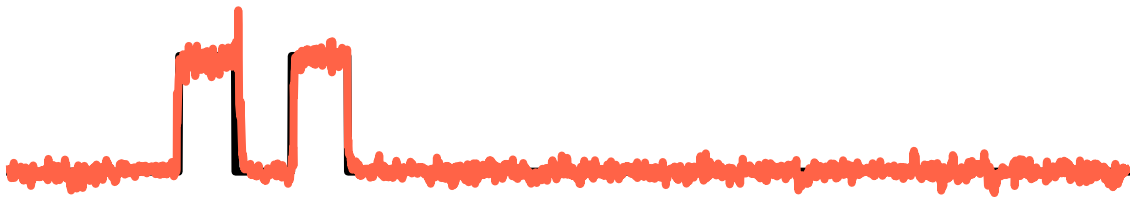

Supplement: fig5-data1 [file elife-77009-fig5-data1-v2.zip]

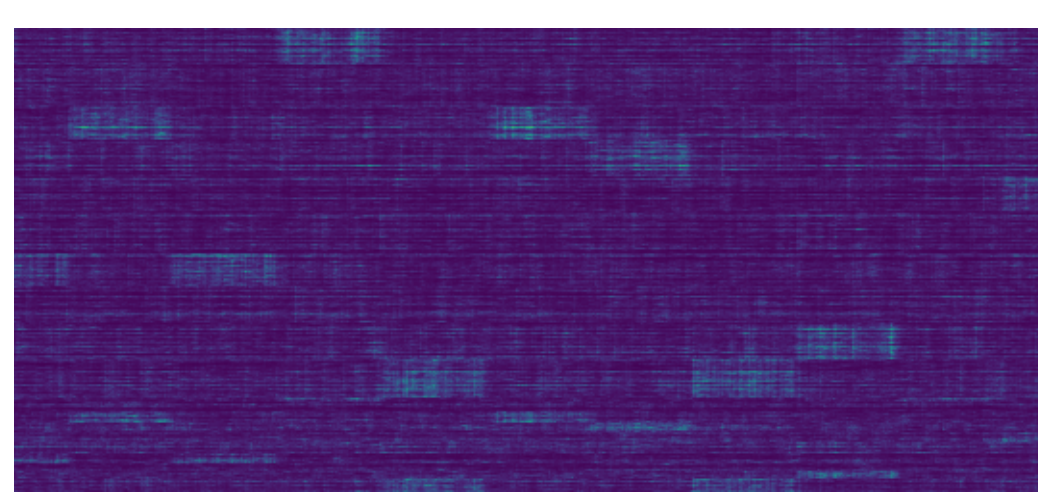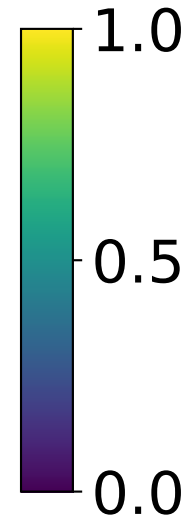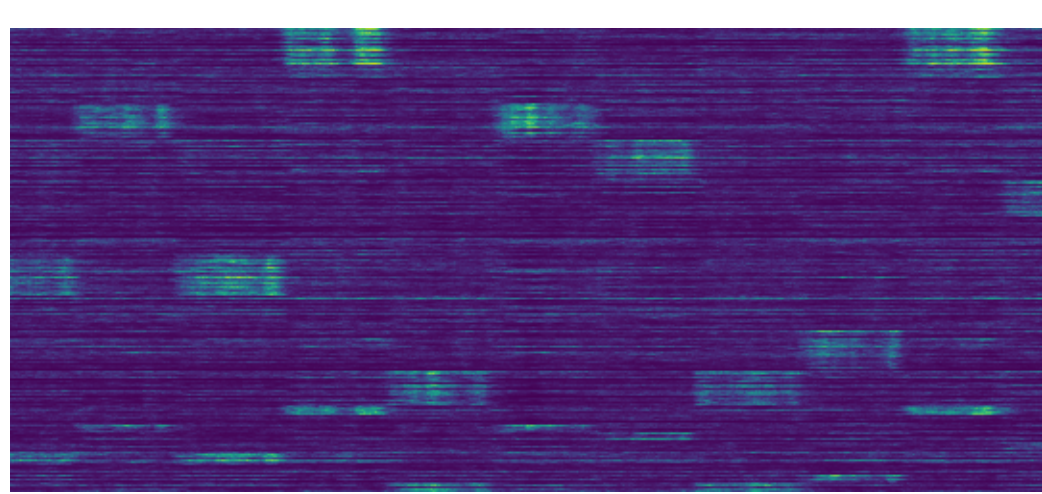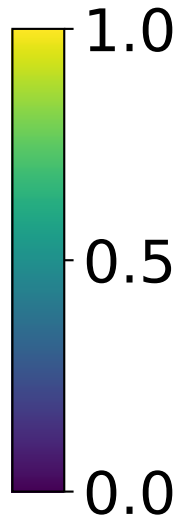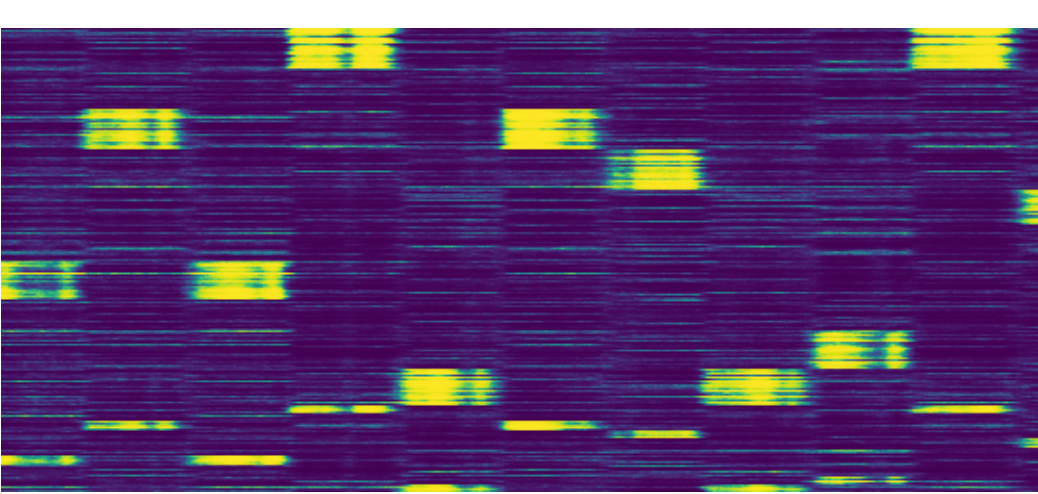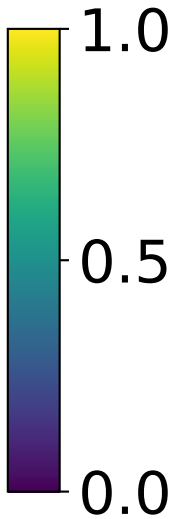

Supplement: fig5-data1 [file elife-77009-fig5-data1-v2.zip]

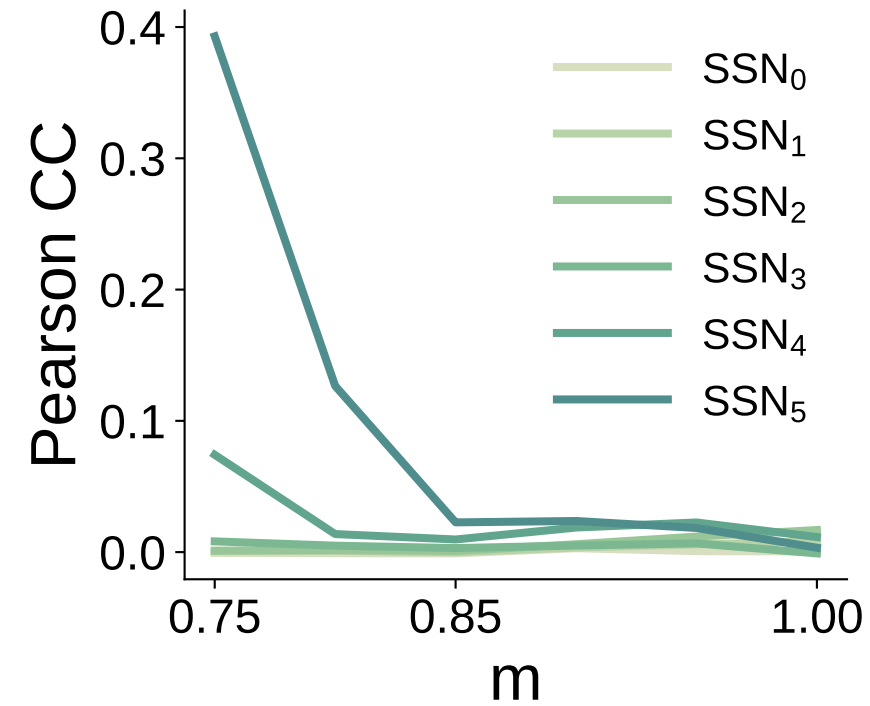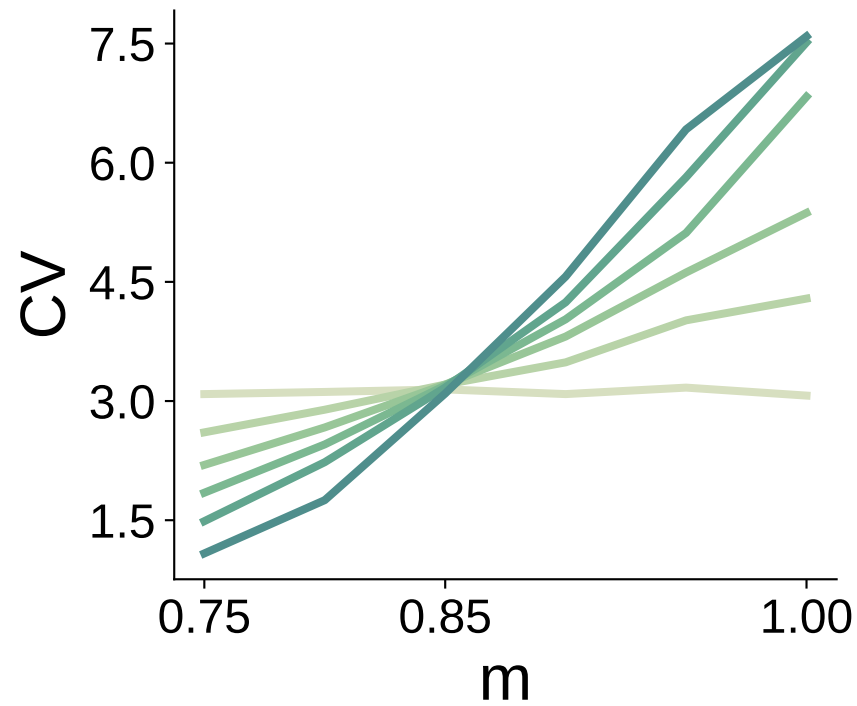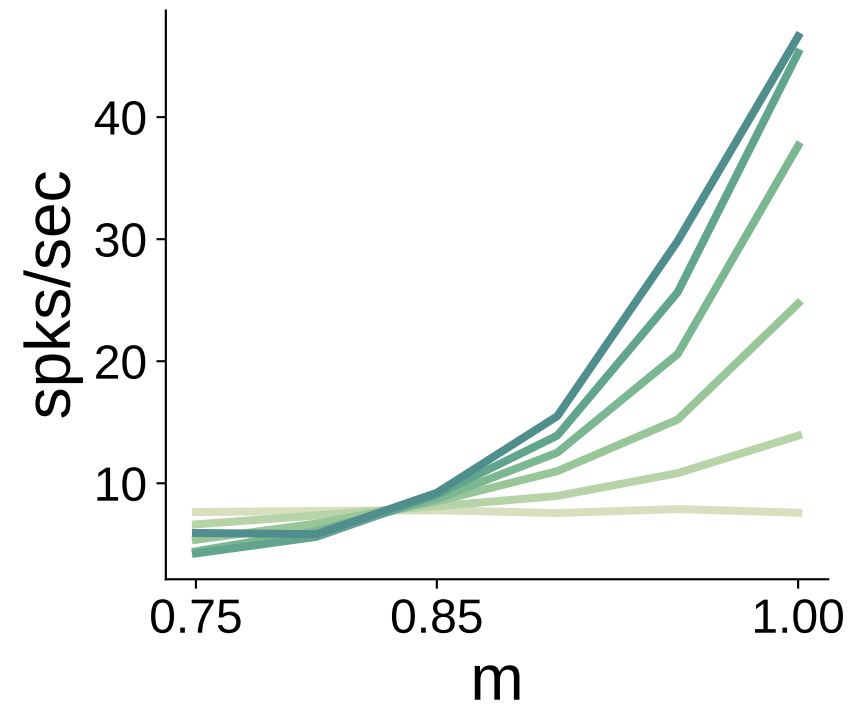

Supplement: fig5-data1 [file elife-77009-fig5-data1-v2.zip]

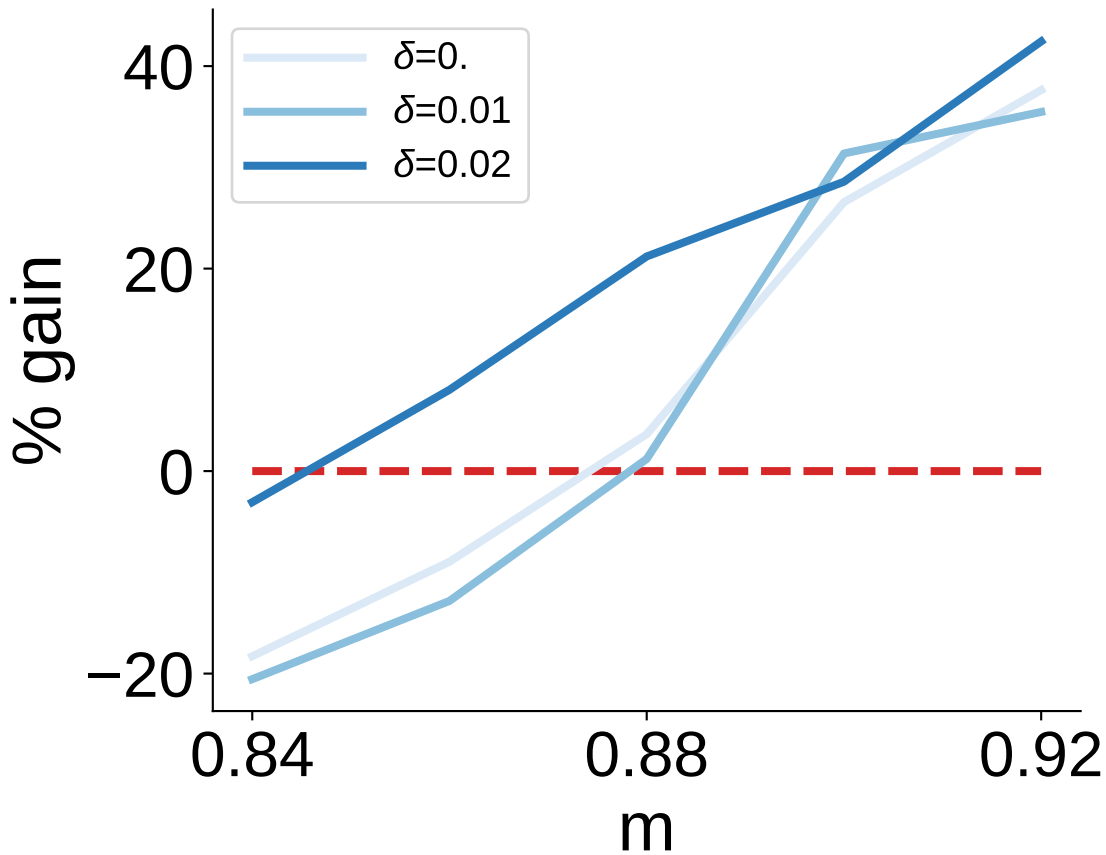

Supplement: fig6-data1 [file elife-77009-fig6-data1-v2.zip]

Map size ( $d$ )

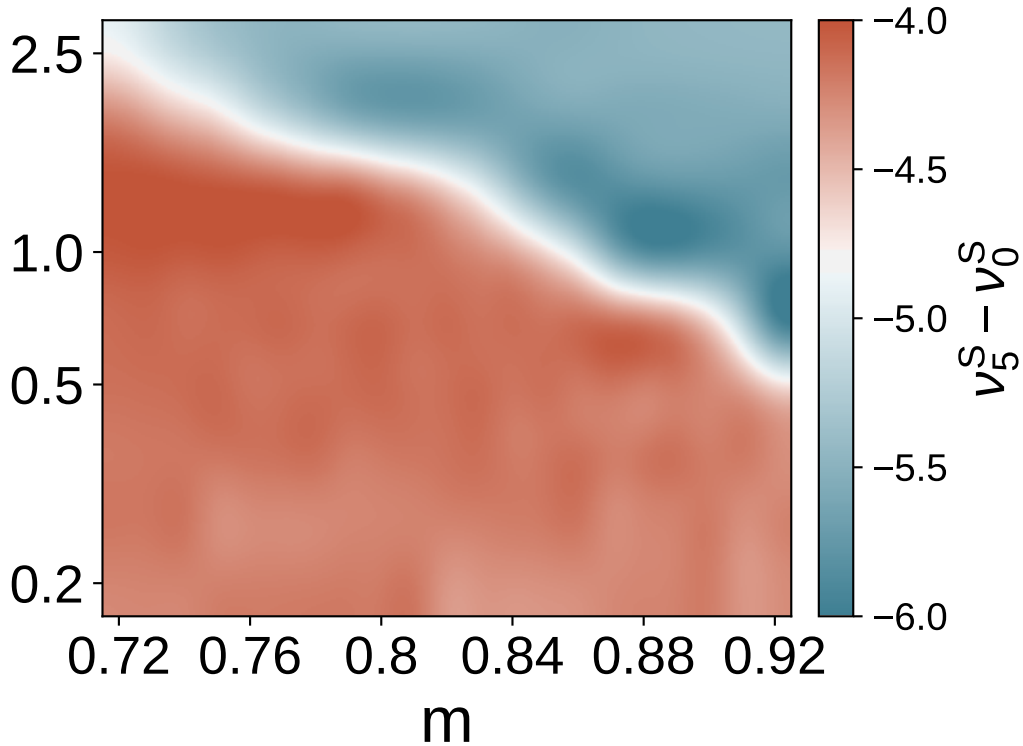

Supplement: fig6-data1 [file elife-77009-fig6-data1-v2.zip]

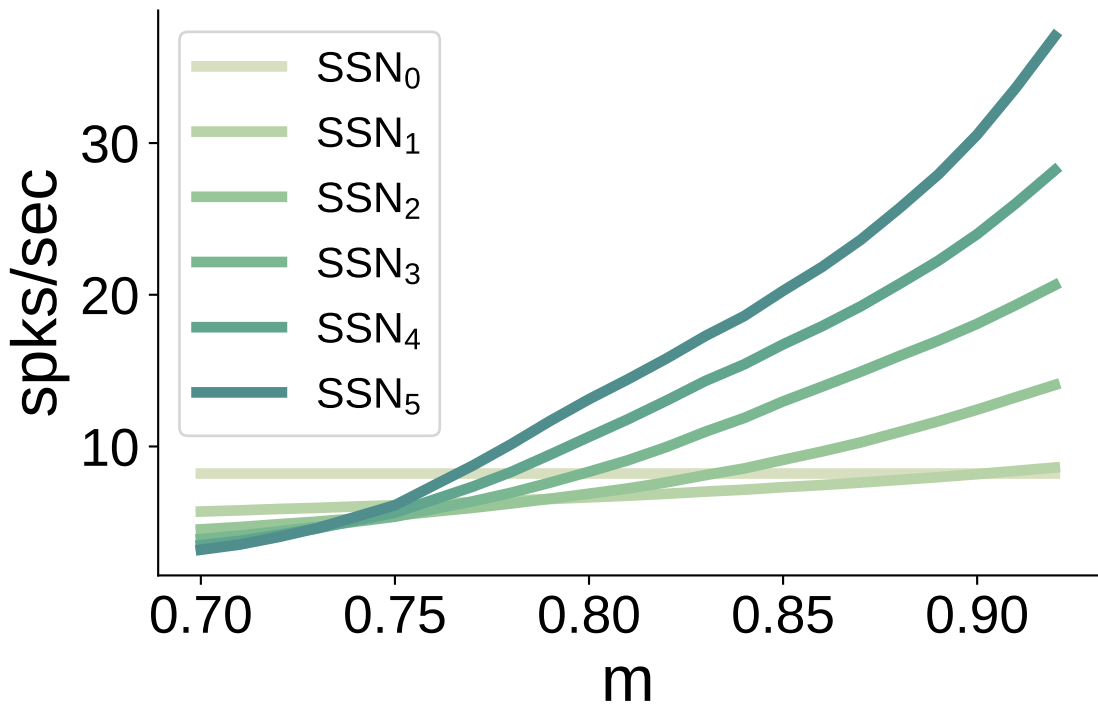

Supplement: fig6-data1 [file elife-77009-fig6-data1-v2.zip]

% gain

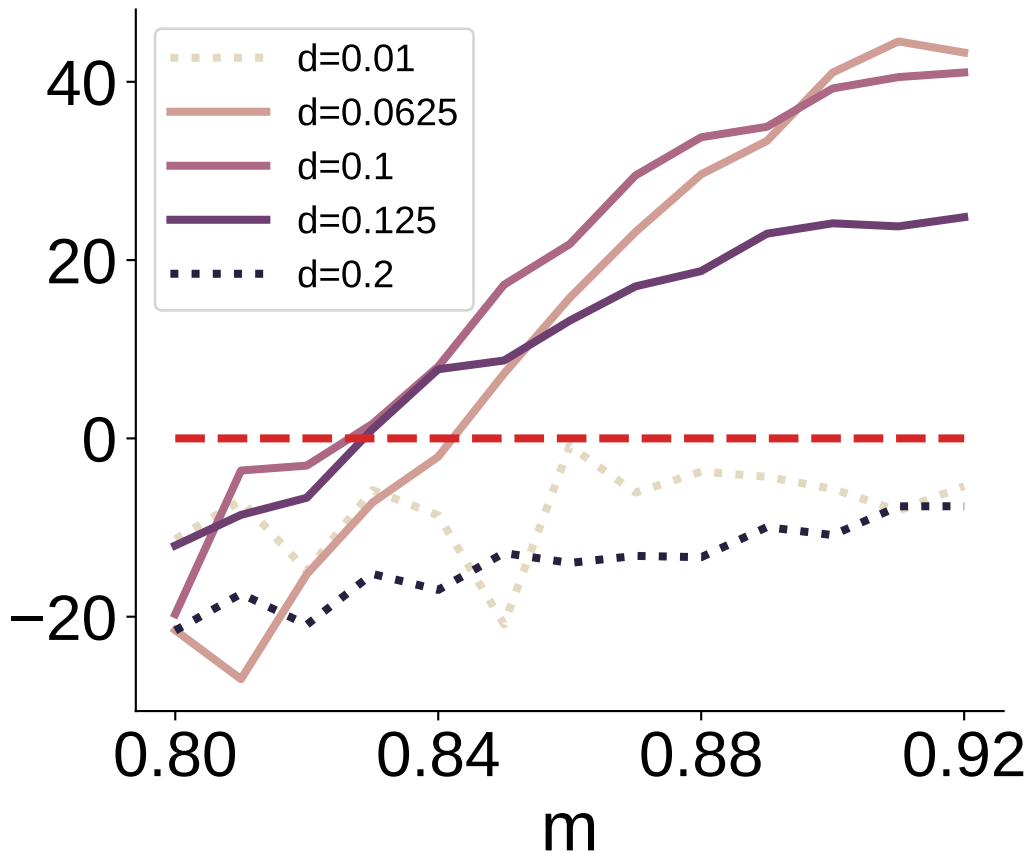

Supplement: fig6-data1 [file elife-77009-fig6-data1-v2.zip]

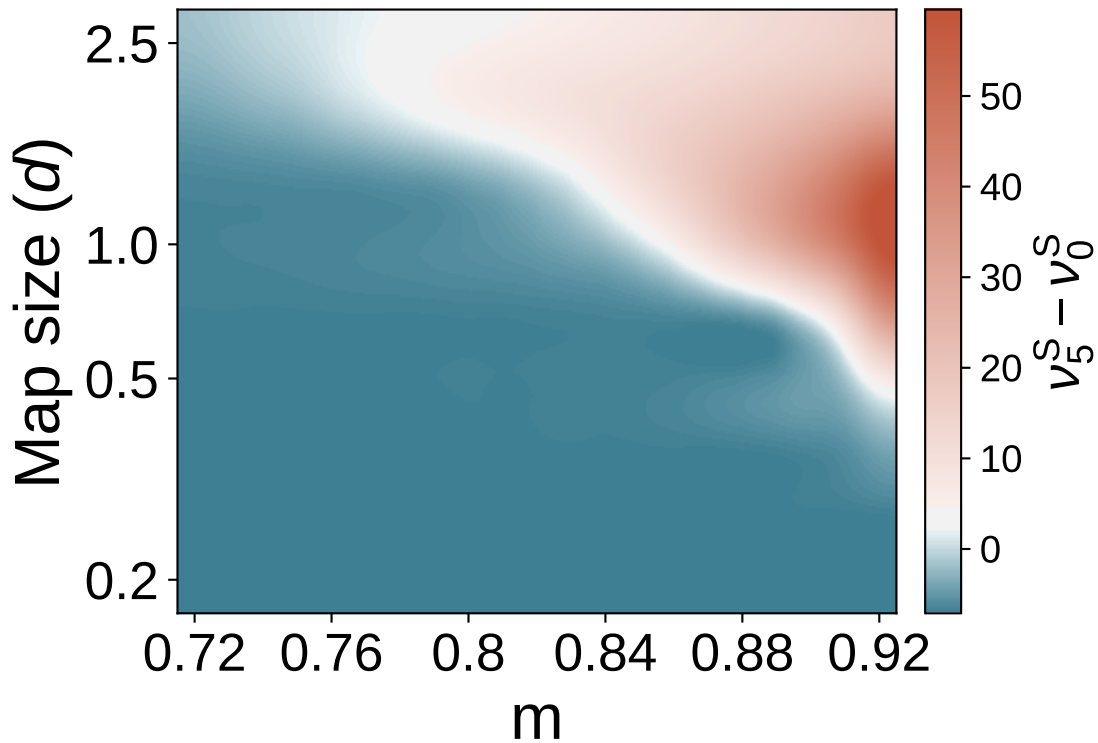

Supplement: fig6-data1 [file elife-77009-fig6-data1-v2.zip]

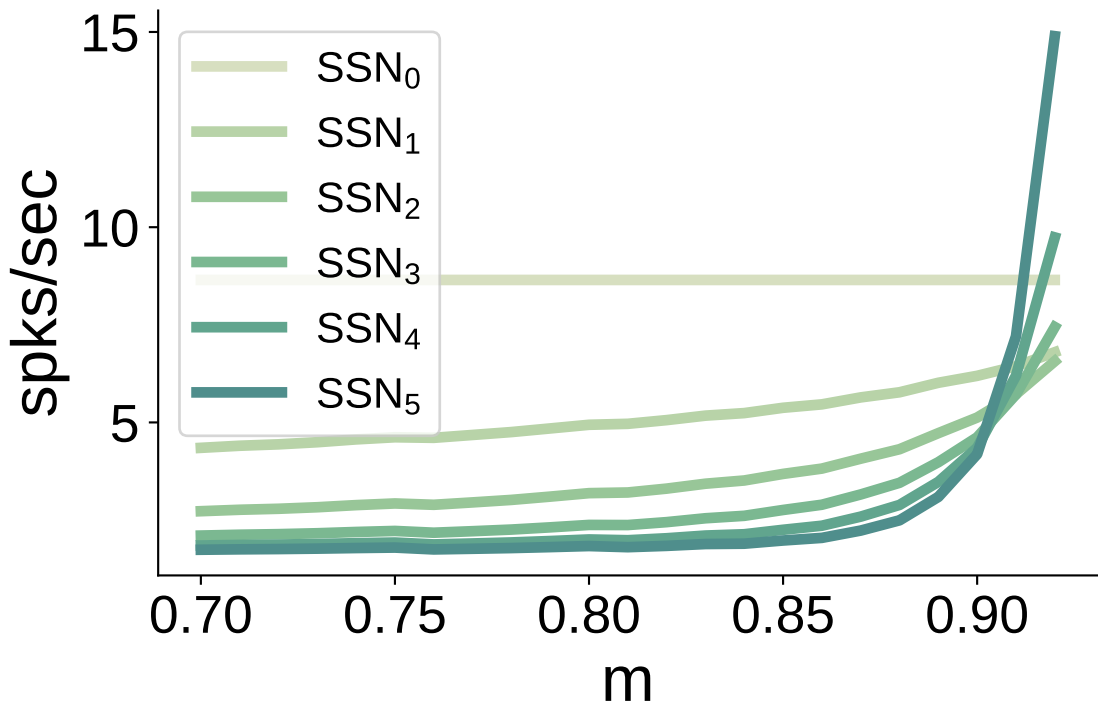

Supplement: fig6-data1 [file elife-77009-fig6-data1-v2.zip]

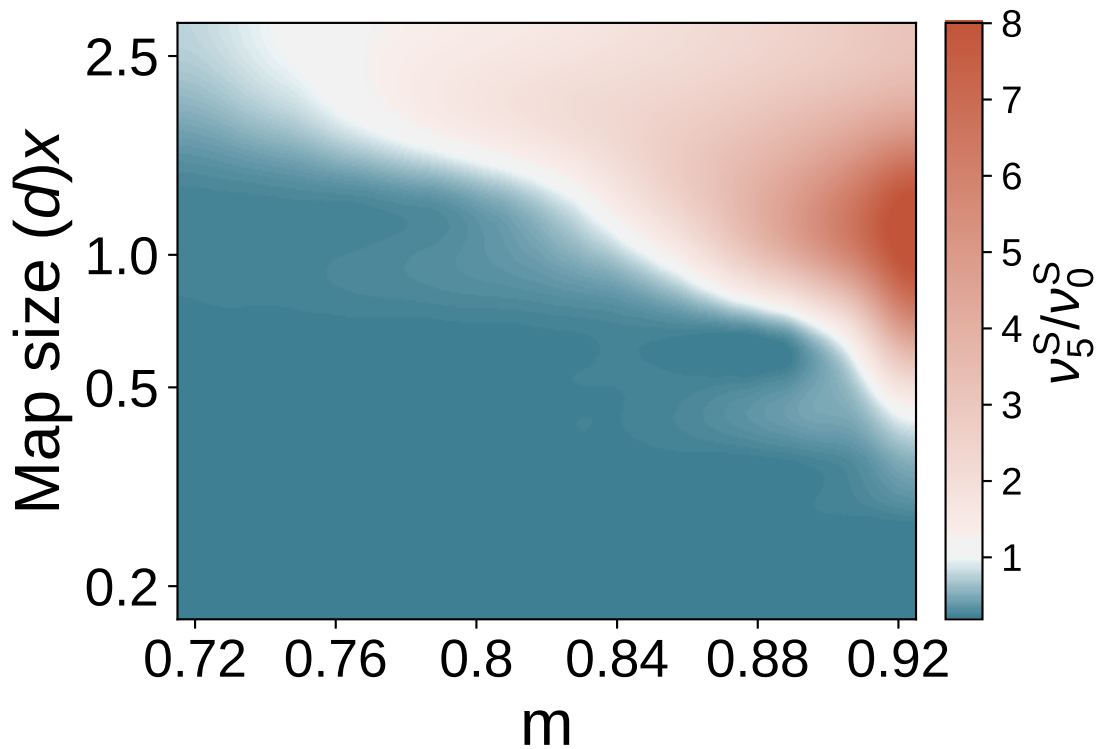

Supplement: fig6-data1 [file elife-77009-fig6-data1-v2.zip]

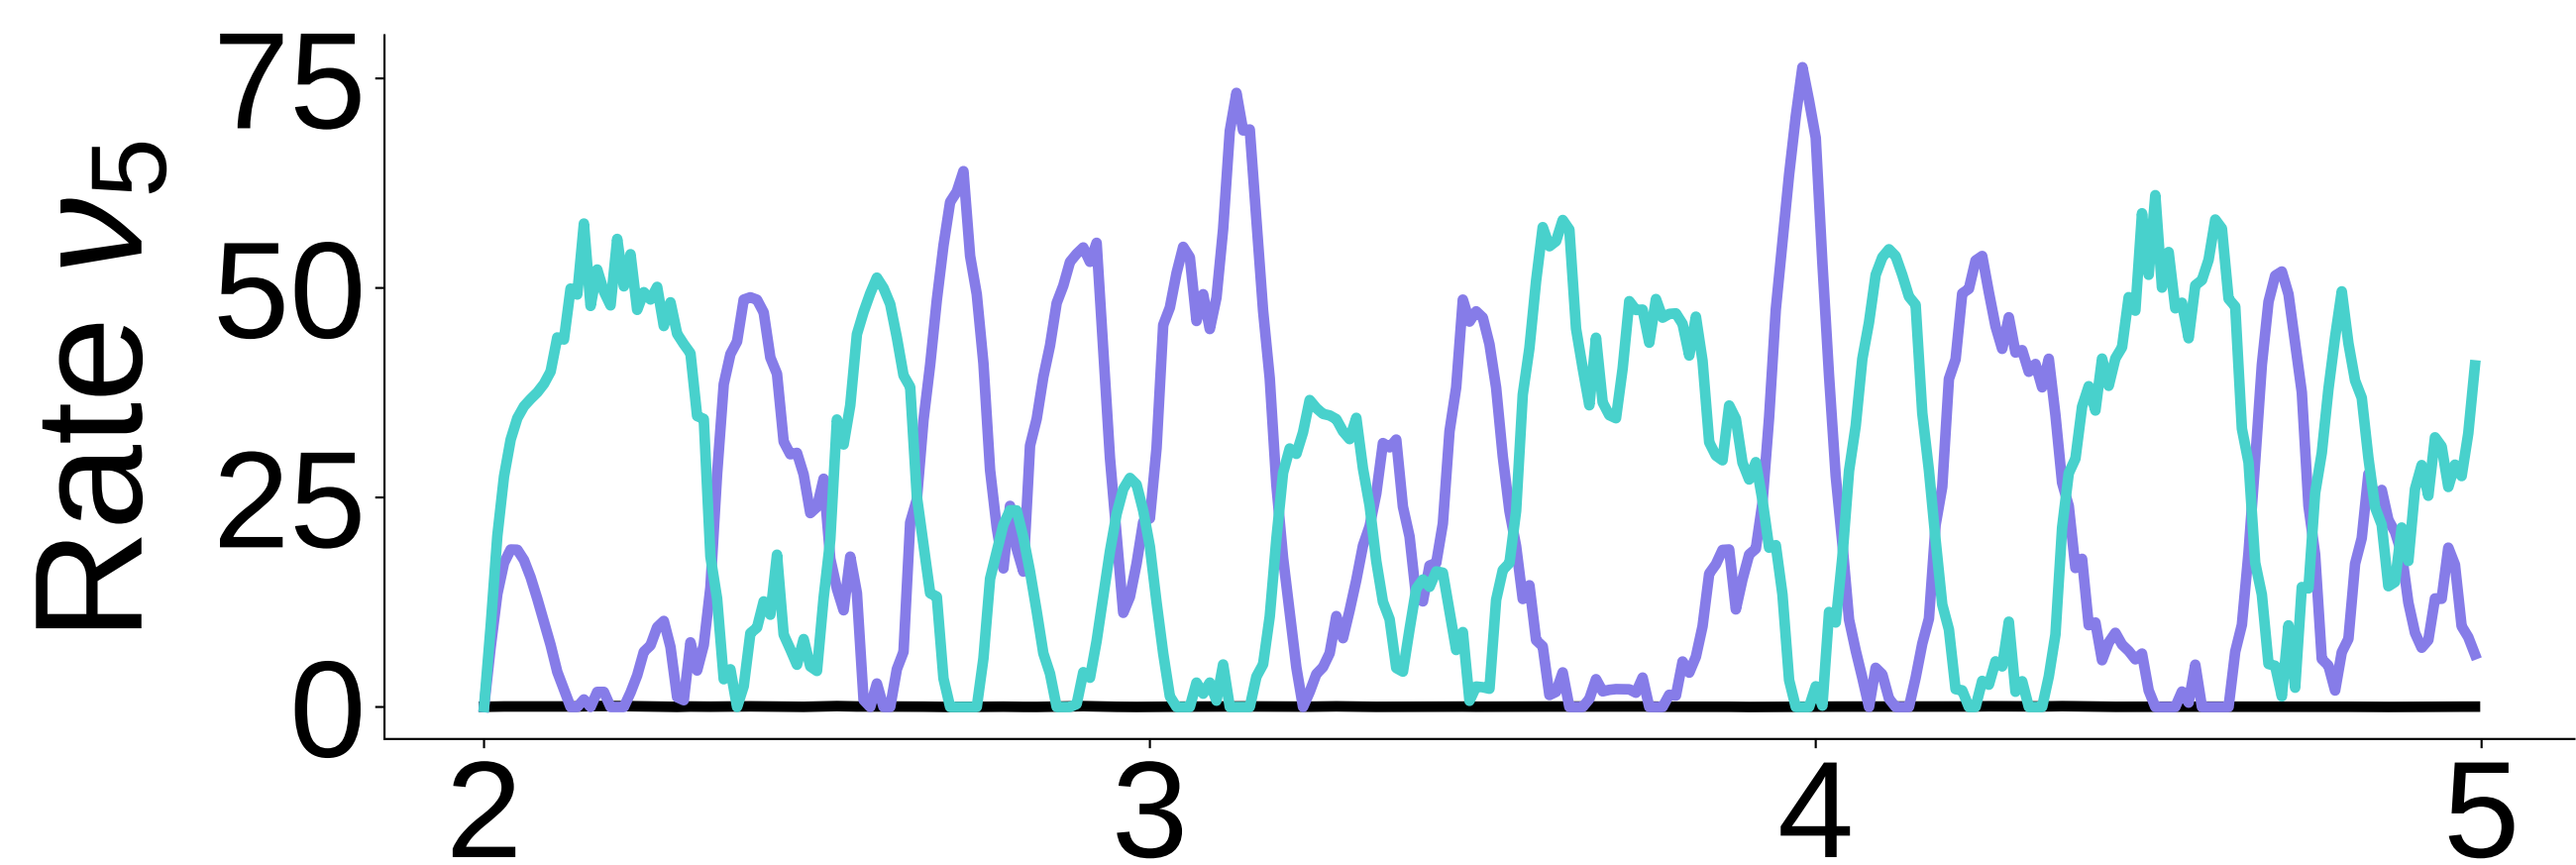

Supplement: fig9-data1 [file elife-77009-fig9-data1-v2.zip]

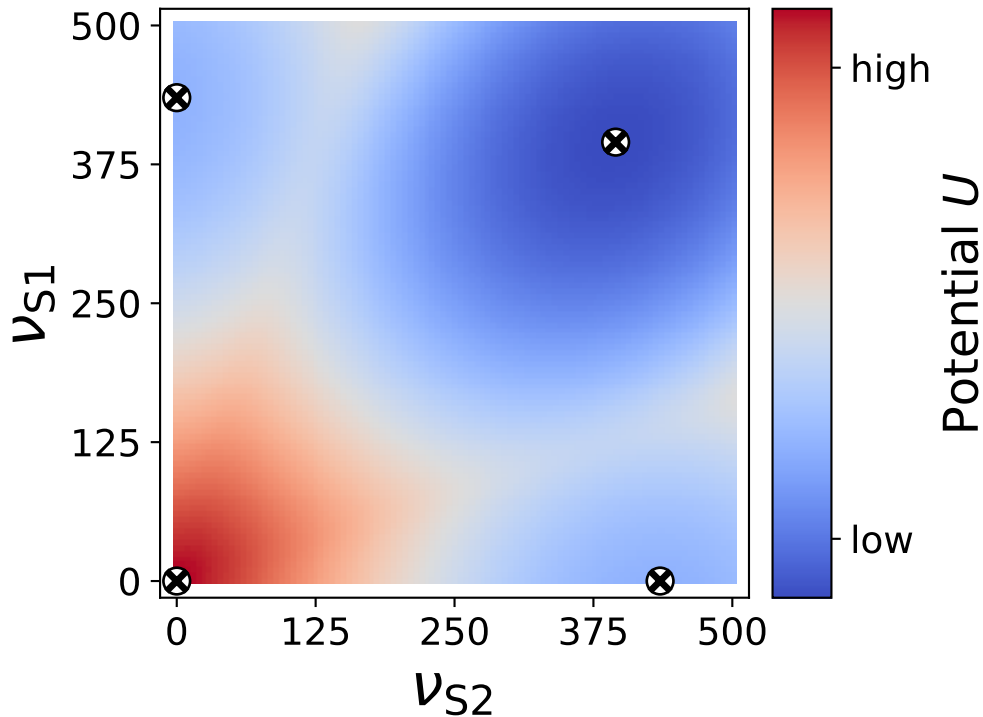

Supplement: fig9-data1 [file elife-77009-fig9-data1-v2.zip]

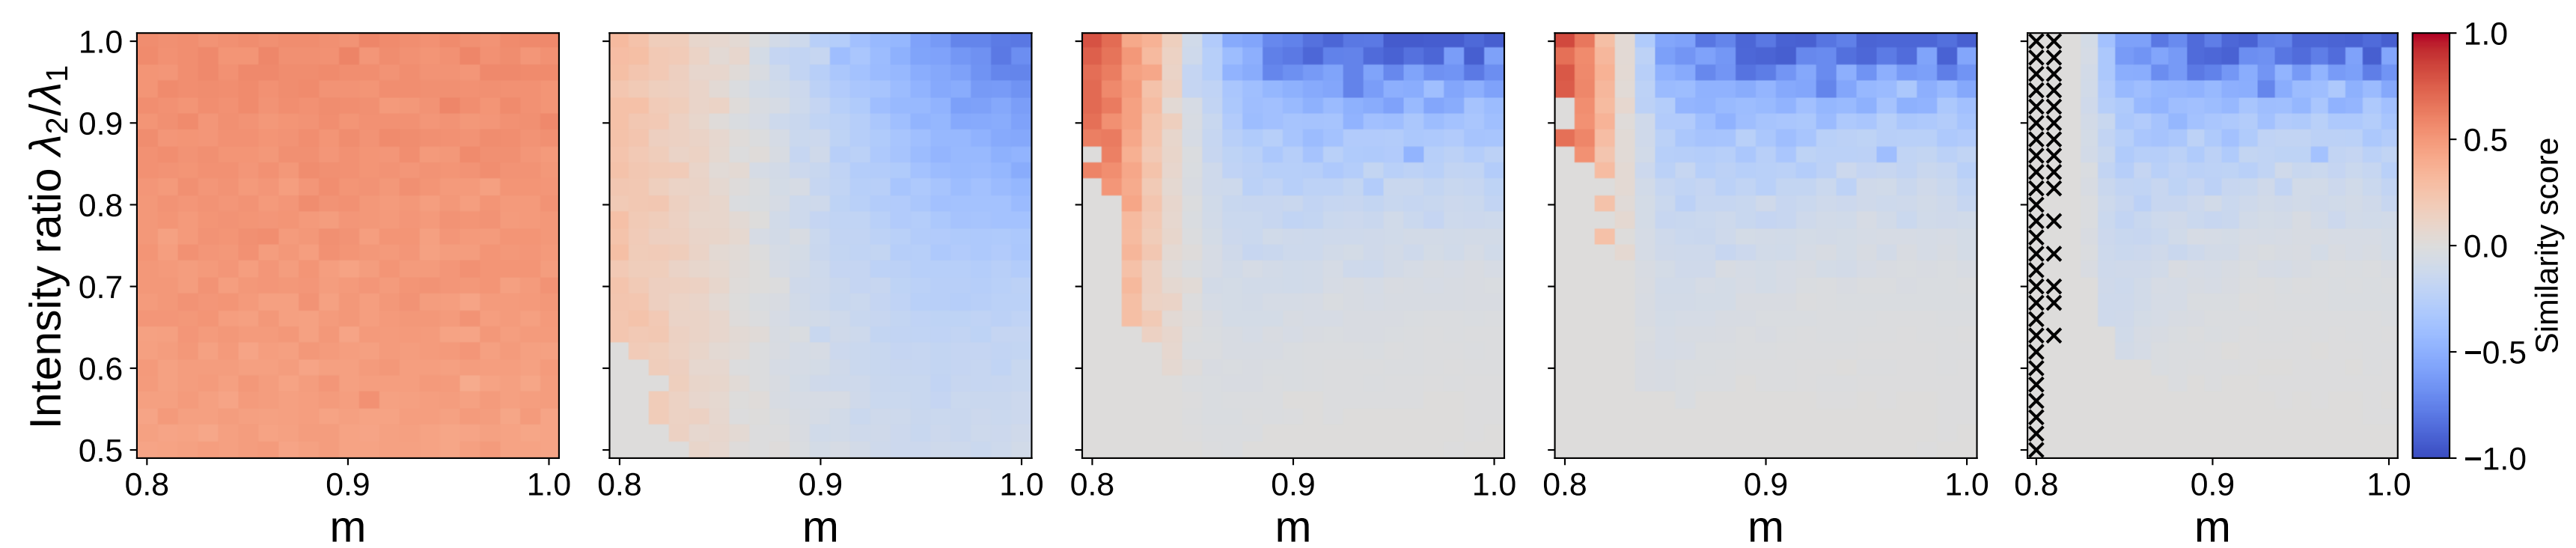

Supplement: fig9-data1 [file elife-77009-fig9-data1-v2.zip]

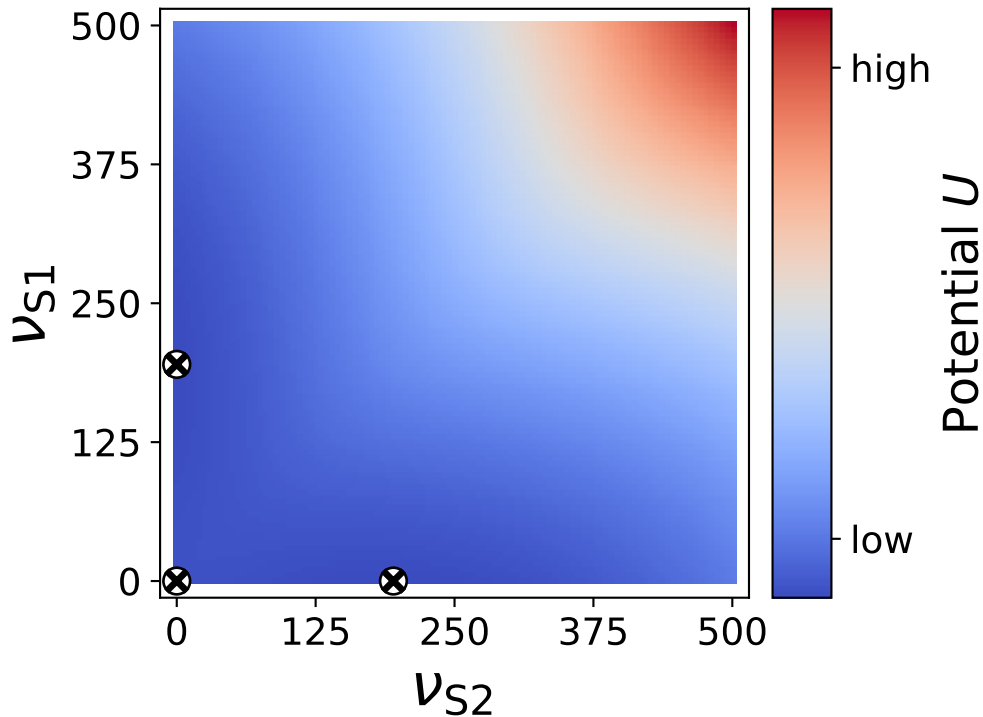

Supplement: fig9-data1 [file elife-77009-fig9-data1-v2.zip]

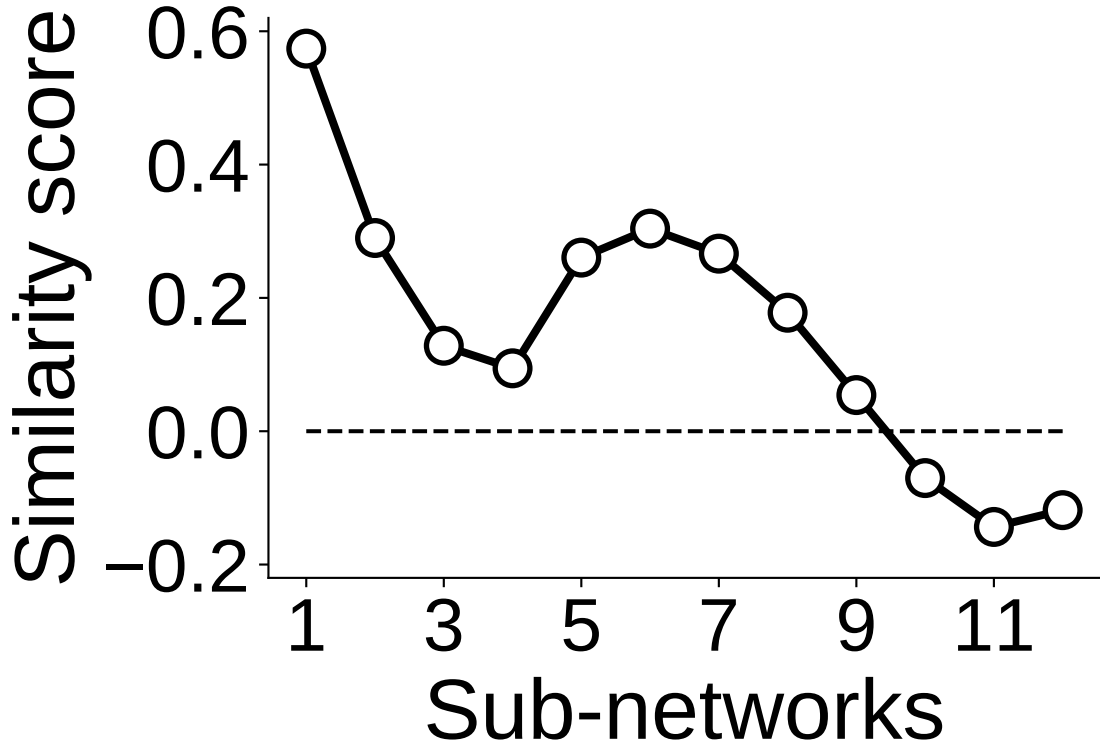

Supplement: fig9-data1 [file elife-77009-fig9-data1-v2.zip]

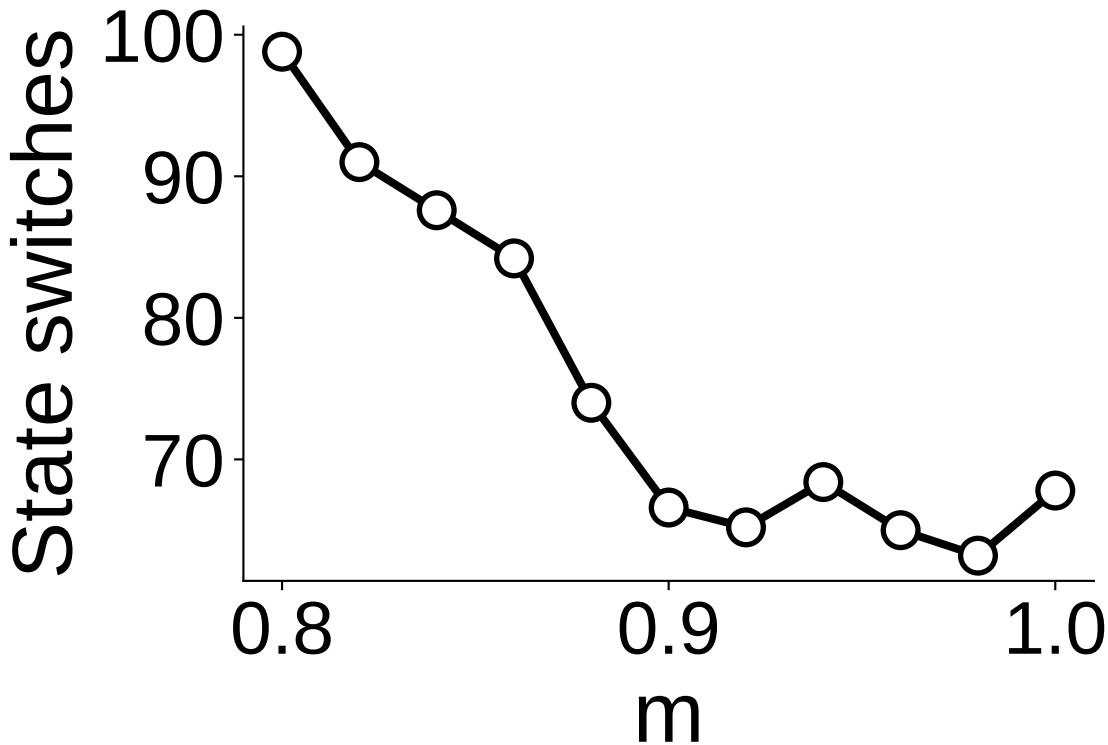

Supplement: fig9-data1 [file elife-77009-fig9-data1-v2.zip]

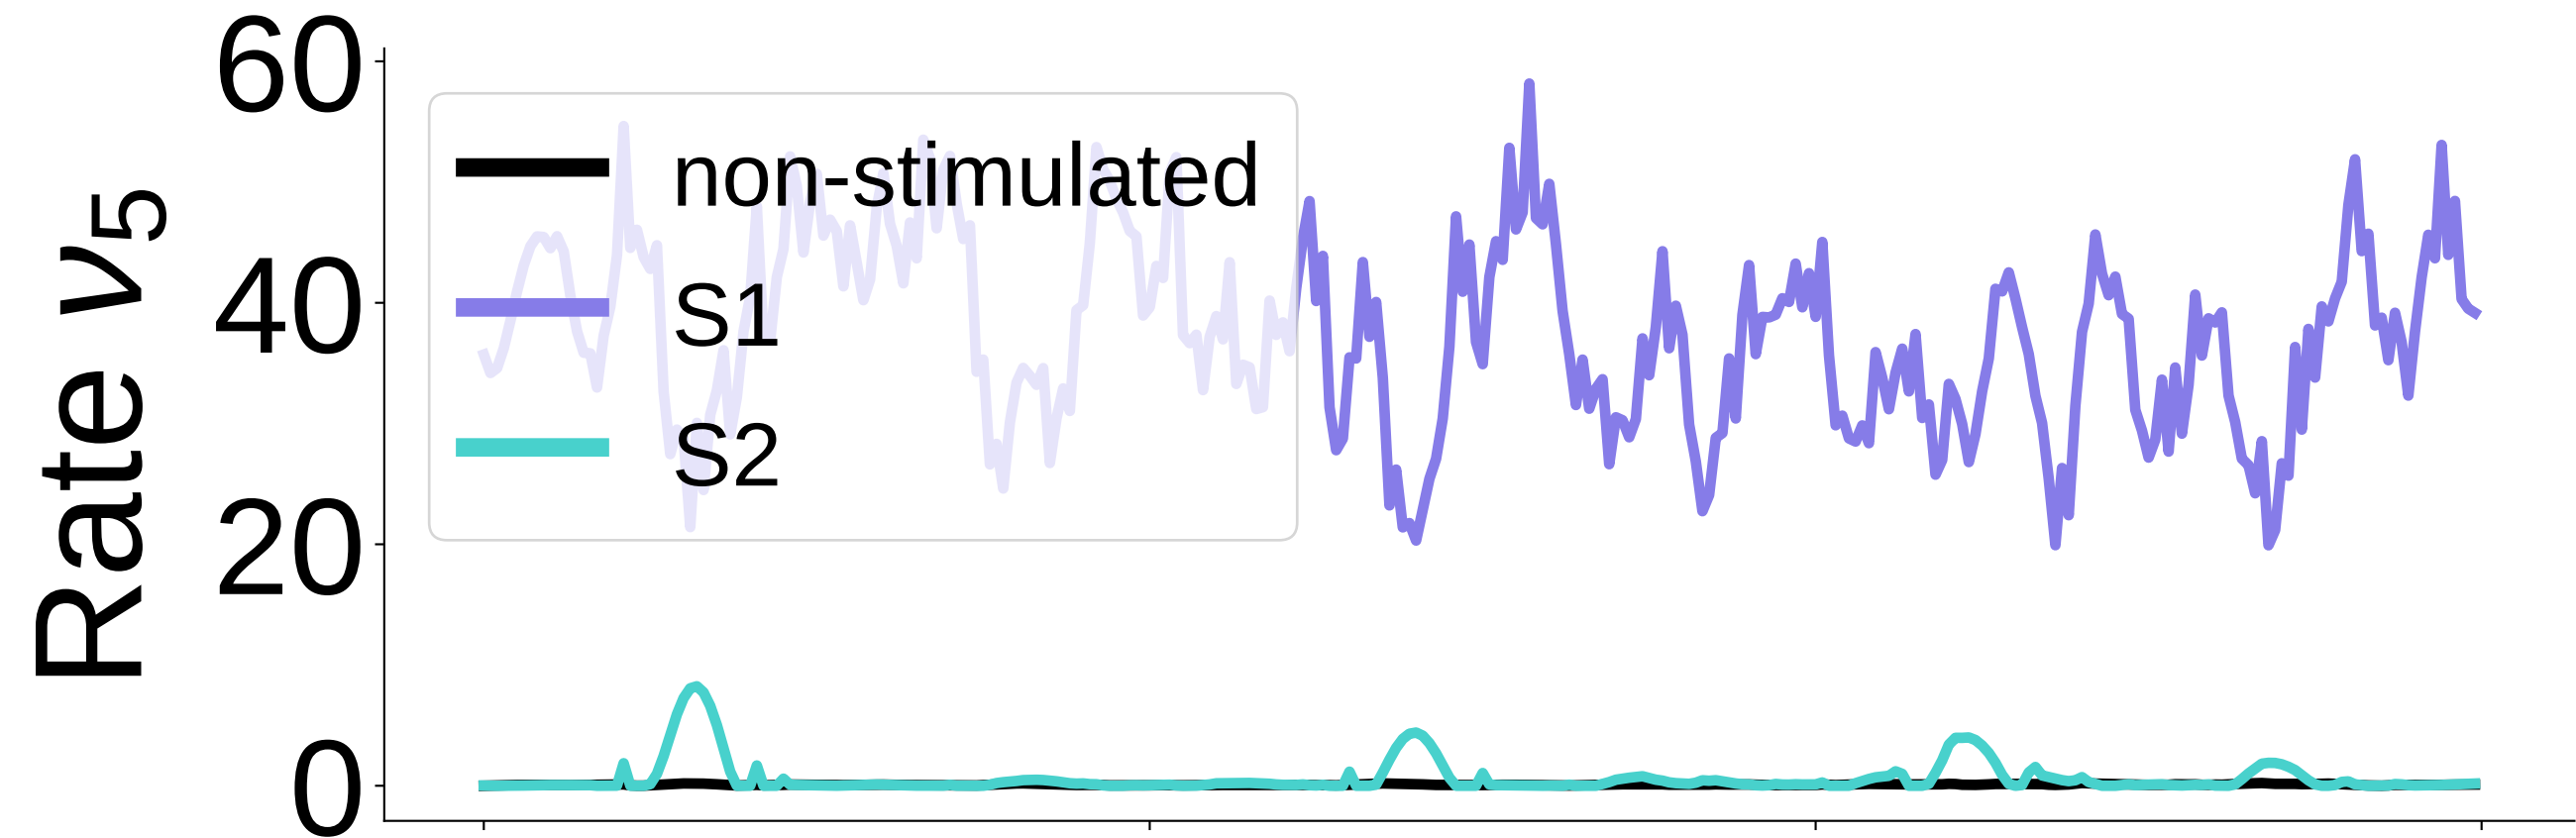

Supplement: fig9-data1 [file elife-77009-fig9-data1-v2.zip]

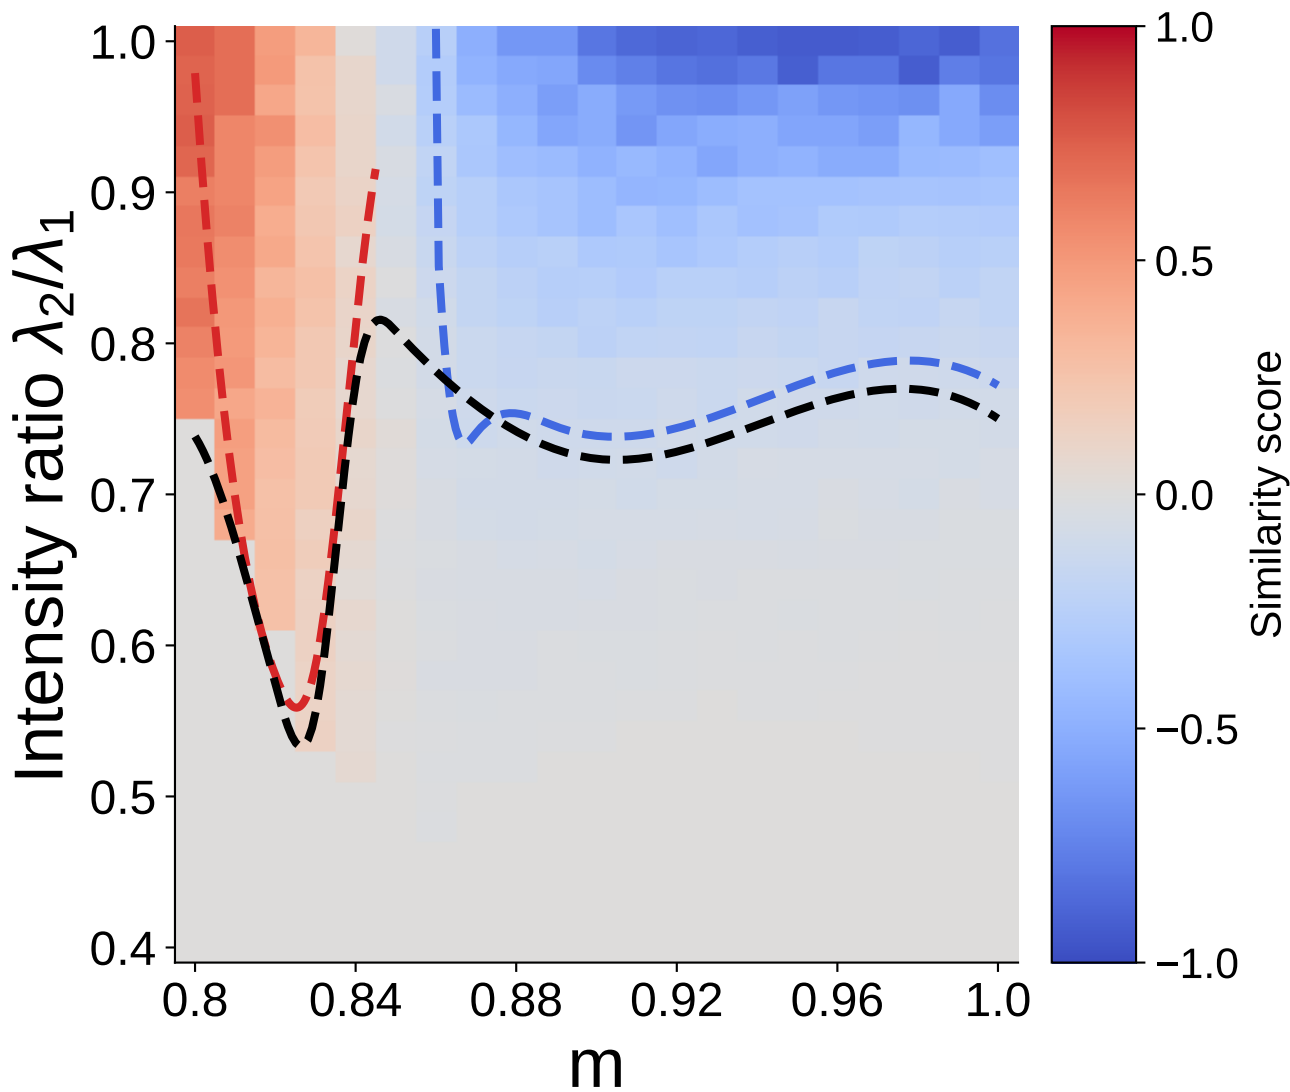

Supplement: fig9-data1 [file elife-77009-fig9-data1-v2.zip]

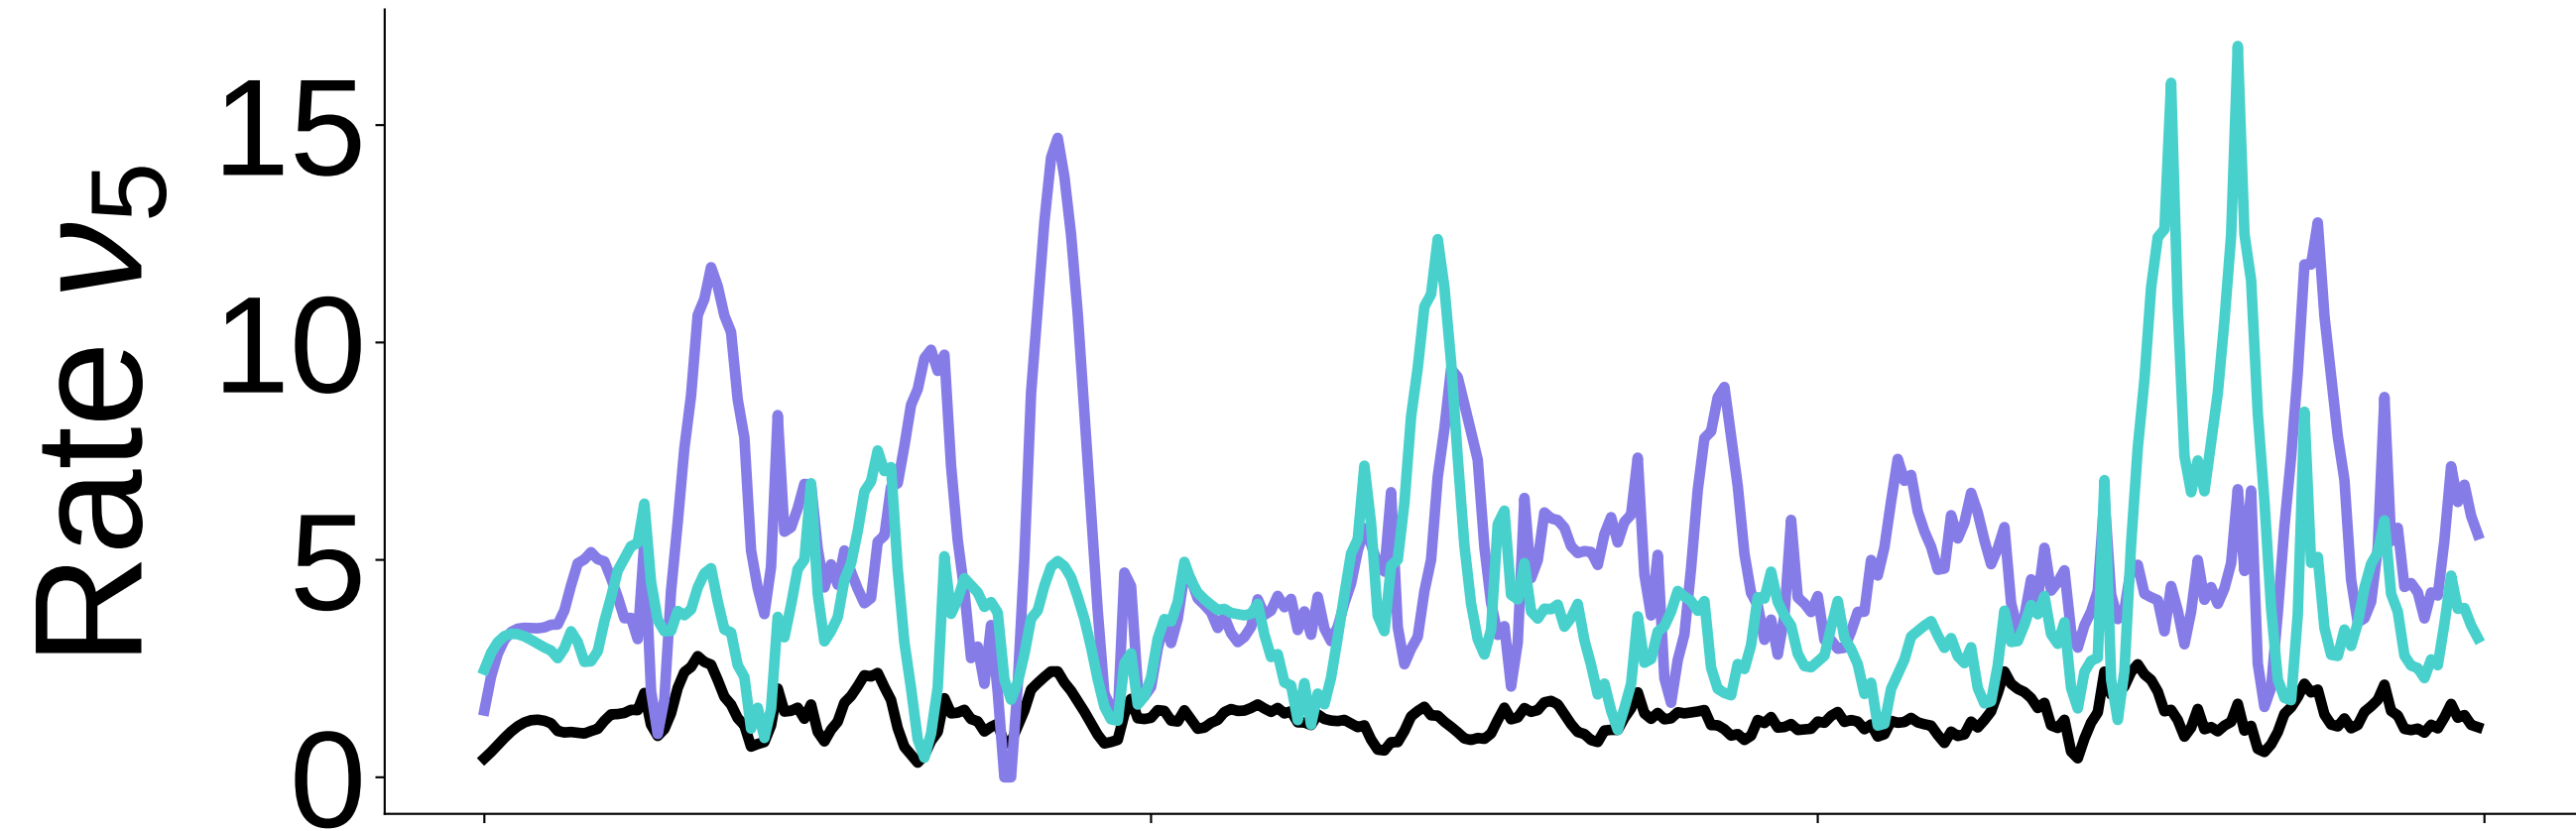

Supplement: fig9-data1 [file elife-77009-fig9-data1-v2.zip]

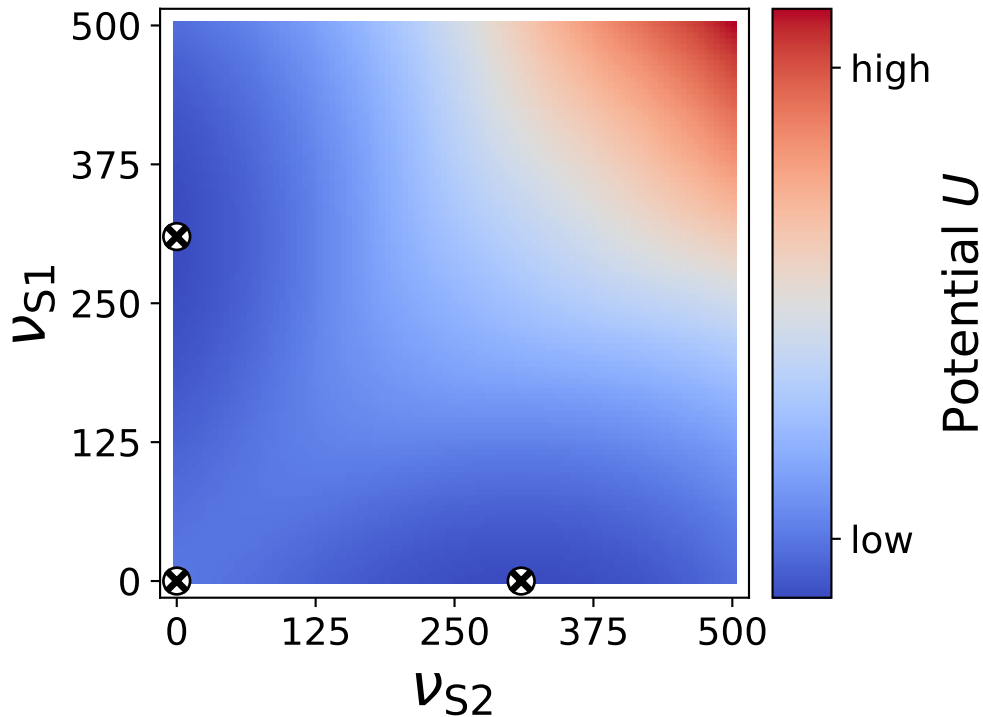

Supplement: fig9-data1 [file elife-77009-fig9-data1-v2.zip]

**a**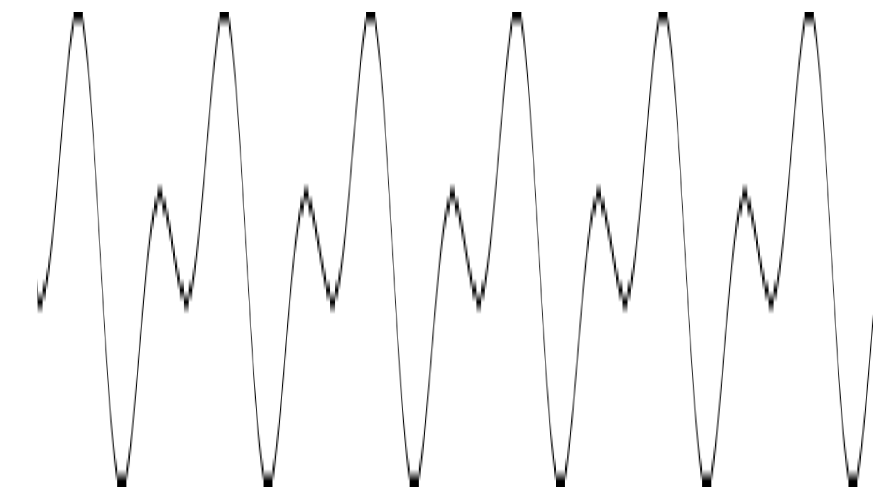

Time 3 sec

**b**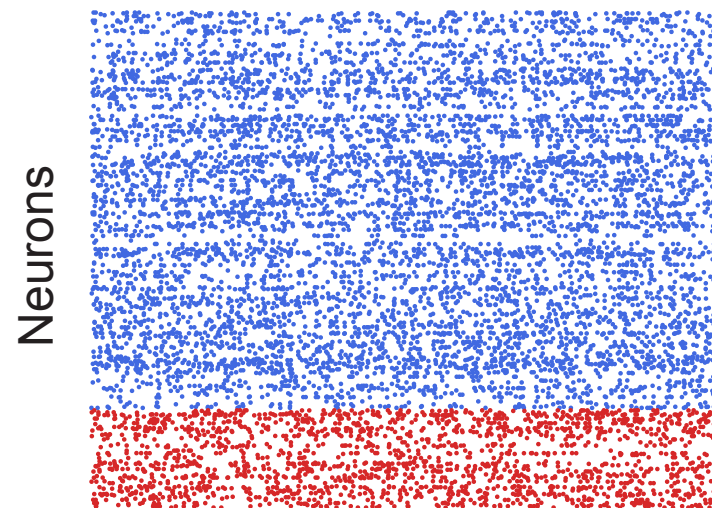

Time 3 sec

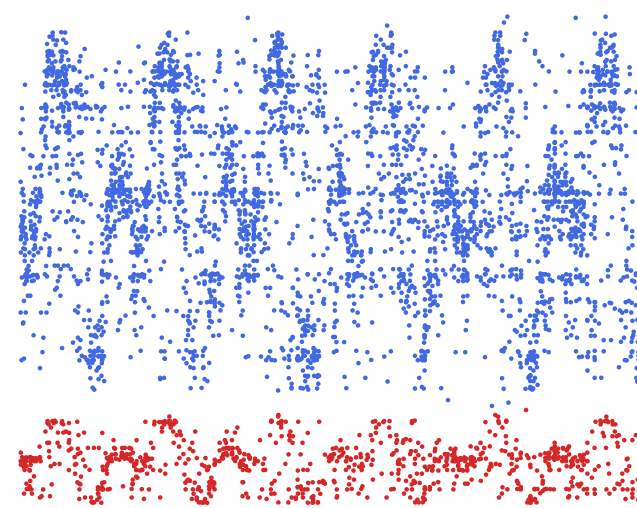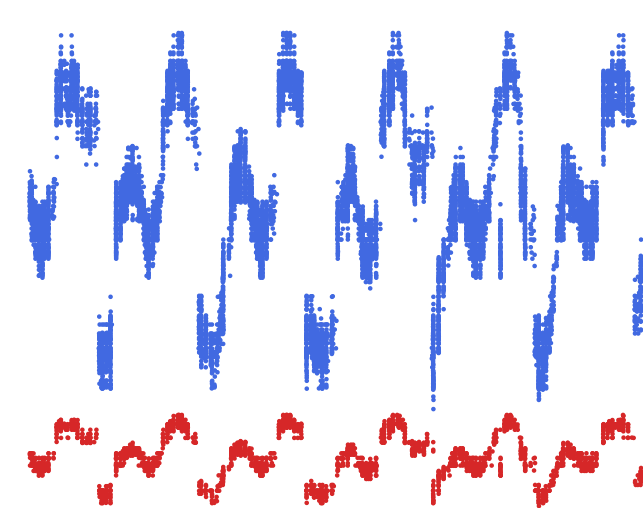**c**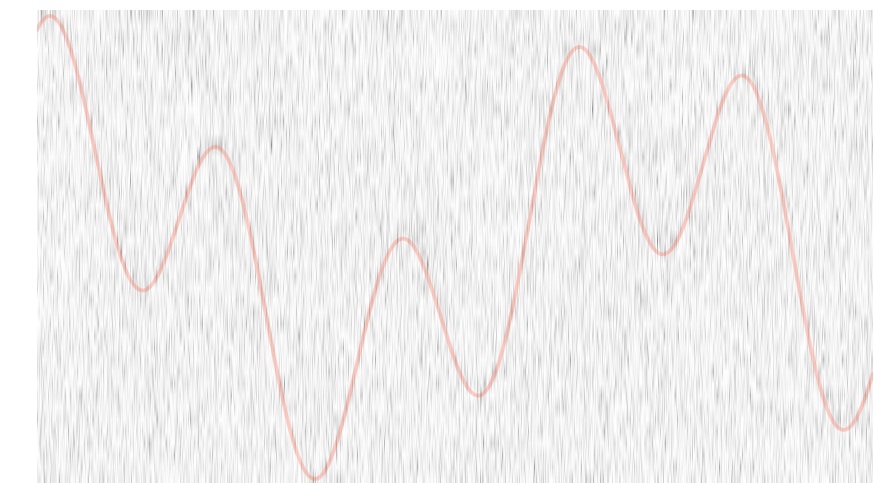

Time 3 sec

**d**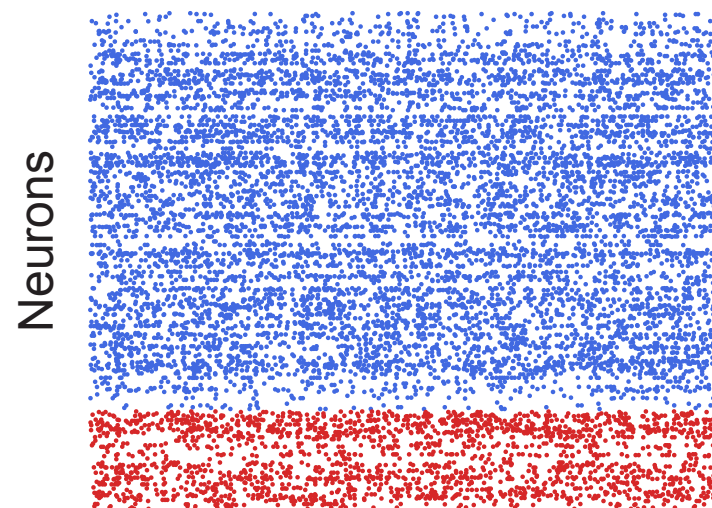

Time 3 sec

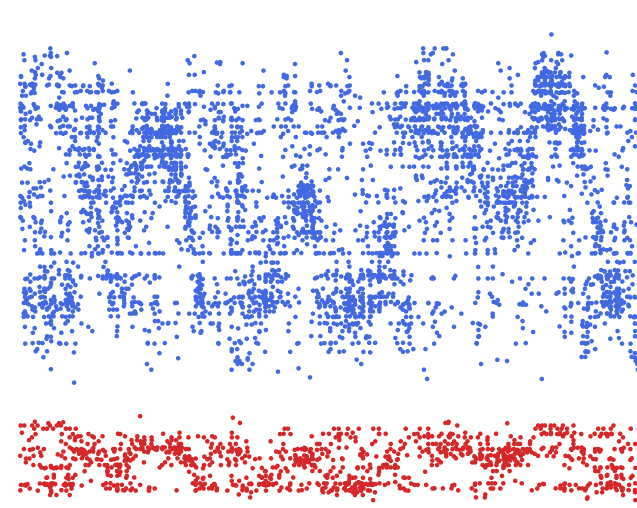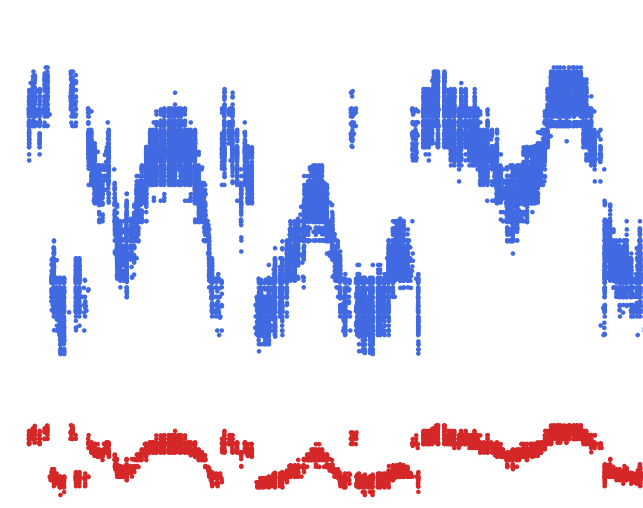

Supplement: supp [file elife_poa_e77009_Figure_10_figure_supplement_1.pdf › elife_poa_e77009_Figure_10_figure_supplement_1.pdf]

**a** $SSN_0$  $SSN_2$  $SSN_5$ 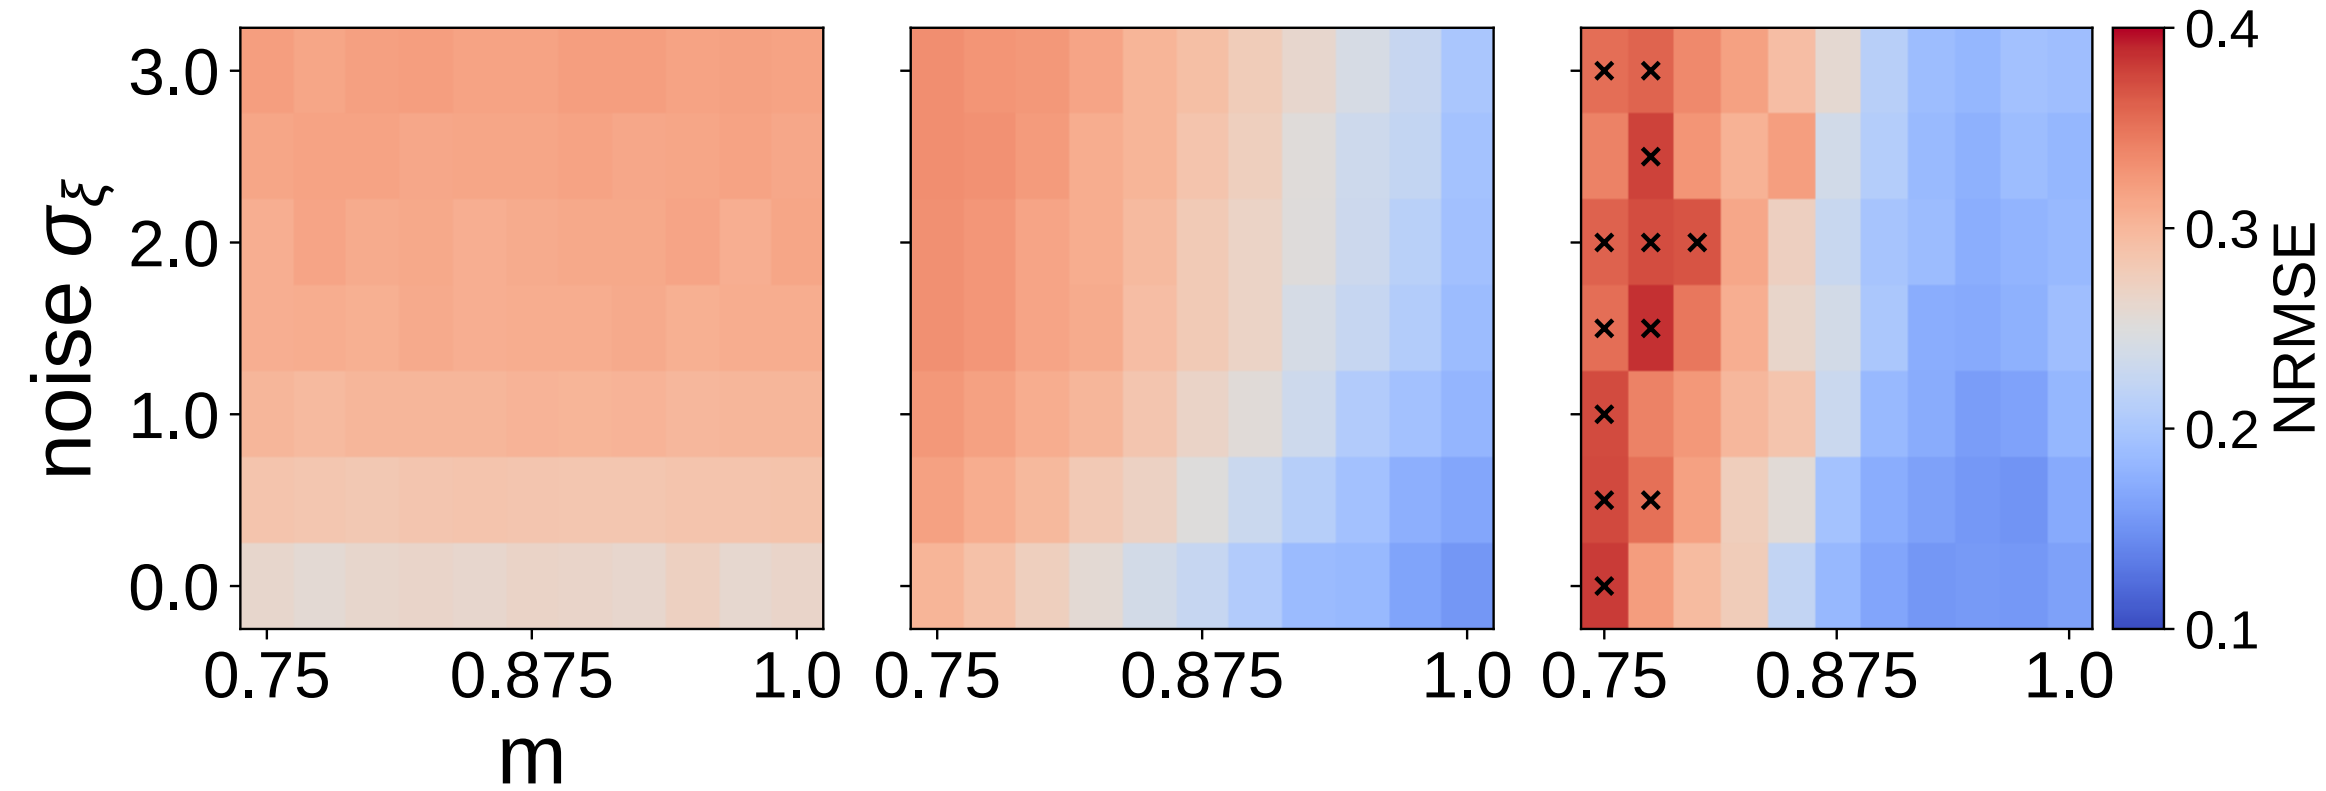**b**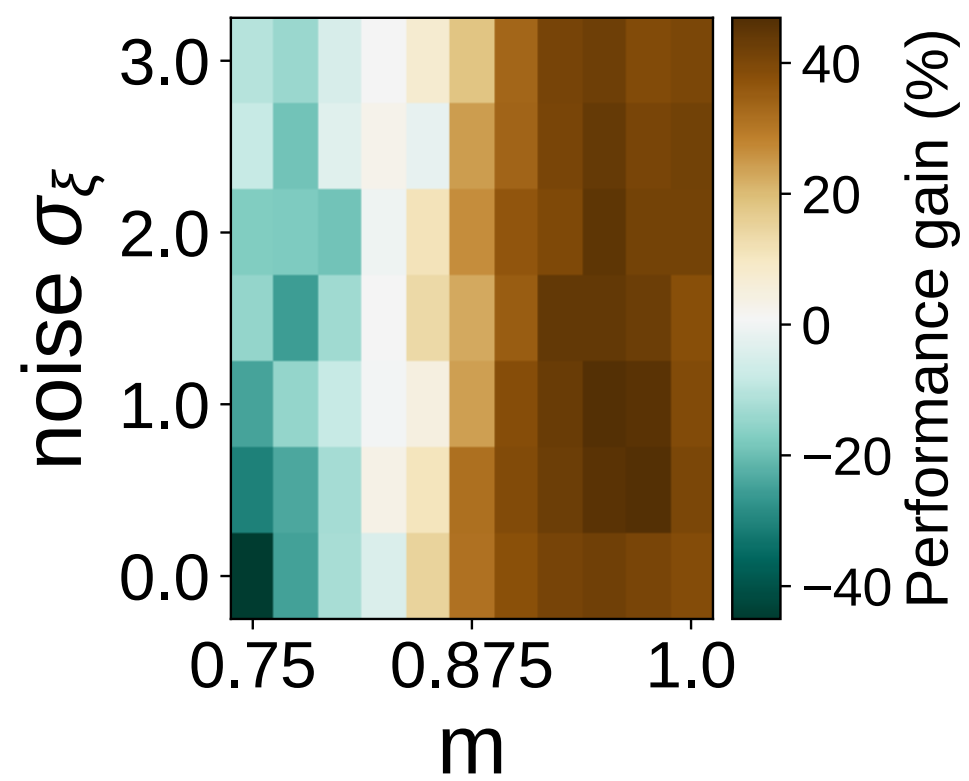

Supplement: supp [file elife_poa_e77009_Figure_1_figure_supplement_1.pdf › elife_poa_e77009_Figure_1_figure_supplement_1.pdf]

**a**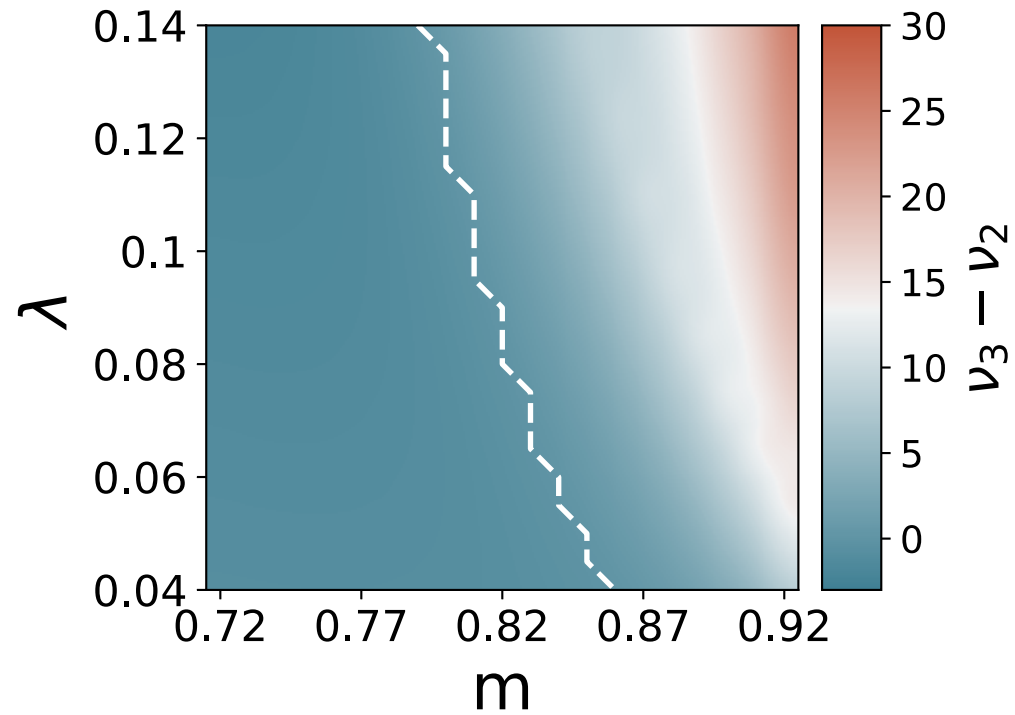**b**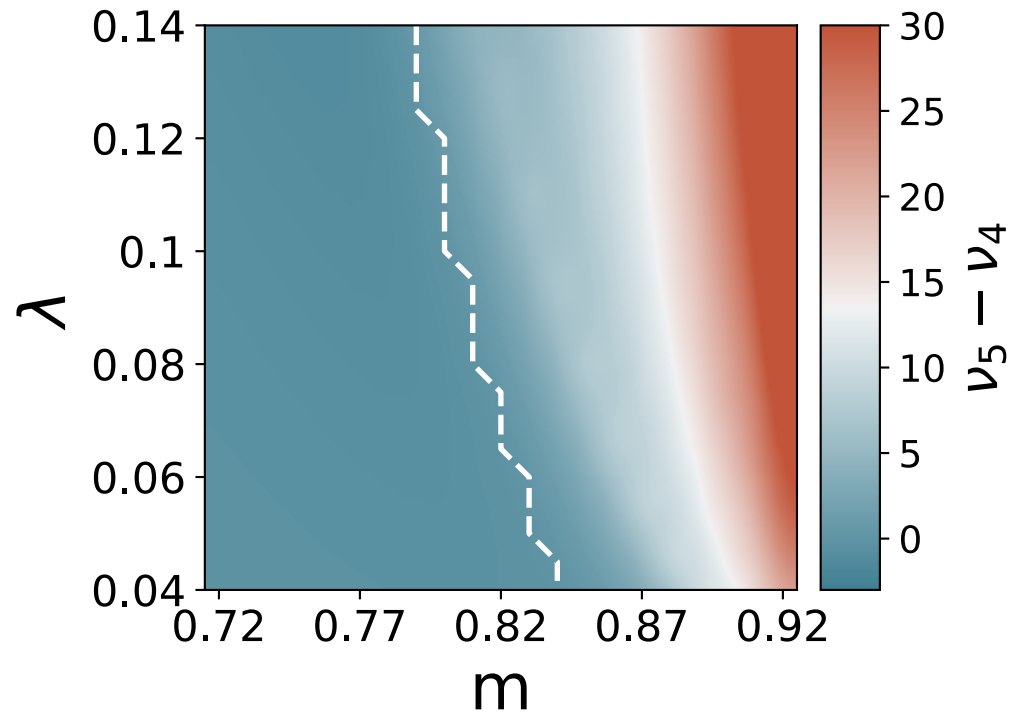

Supplement: supp [file elife_poa_e77009_Figure_2_figure_supplement_1.pdf › elife_poa_e77009_Figure_2_figure_supplement_1.pdf]

**a**

Baseline

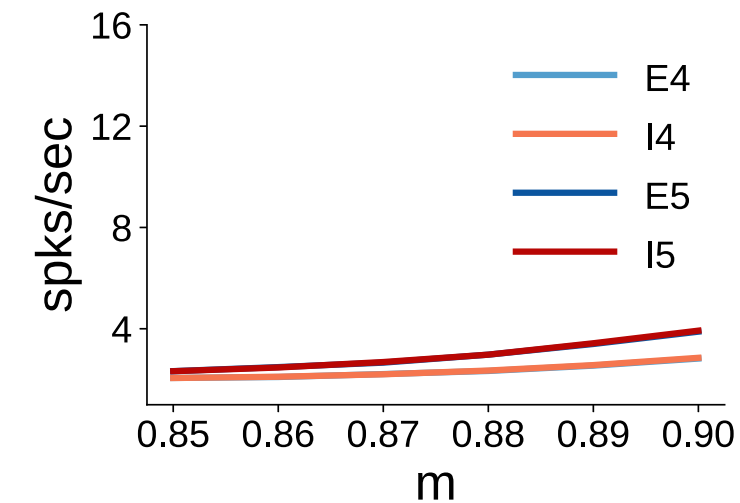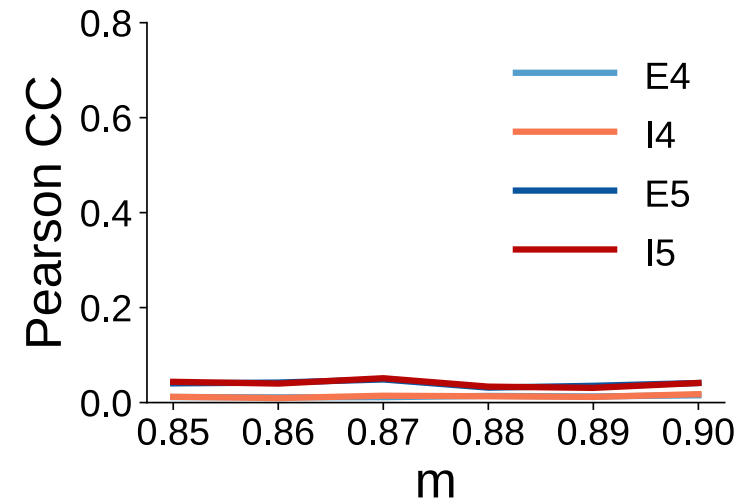**b**Fully random  $E_i - I_{i+1}$ 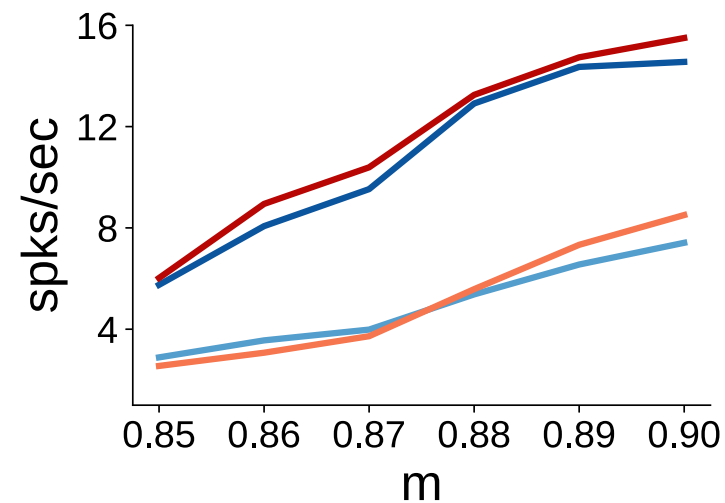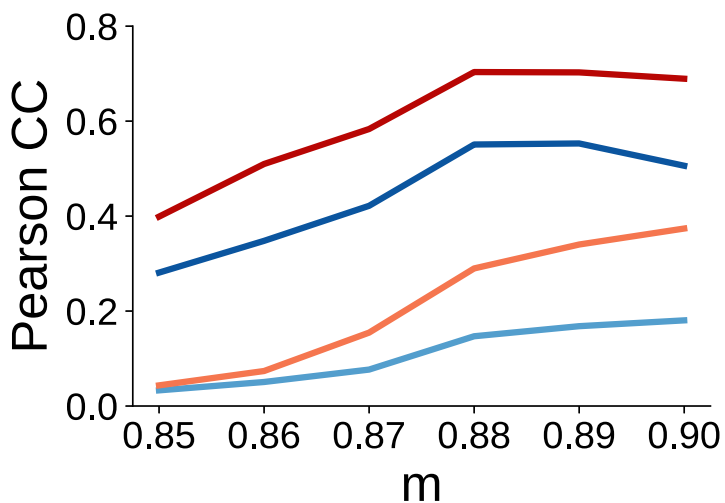**c**Random  $E_4 - I_5$ 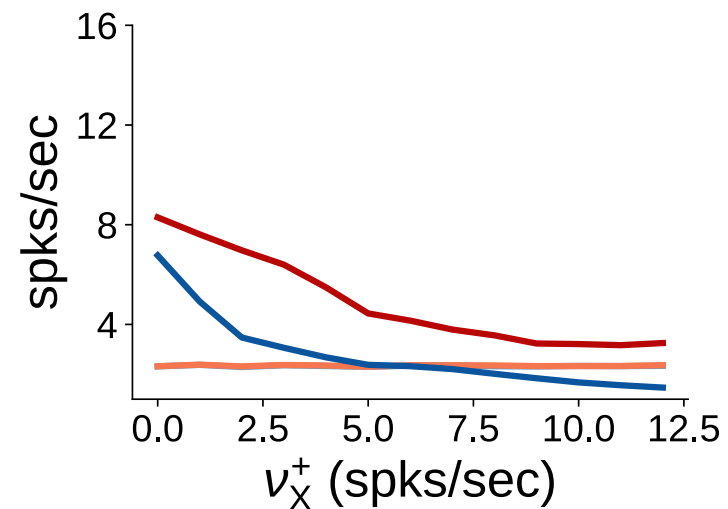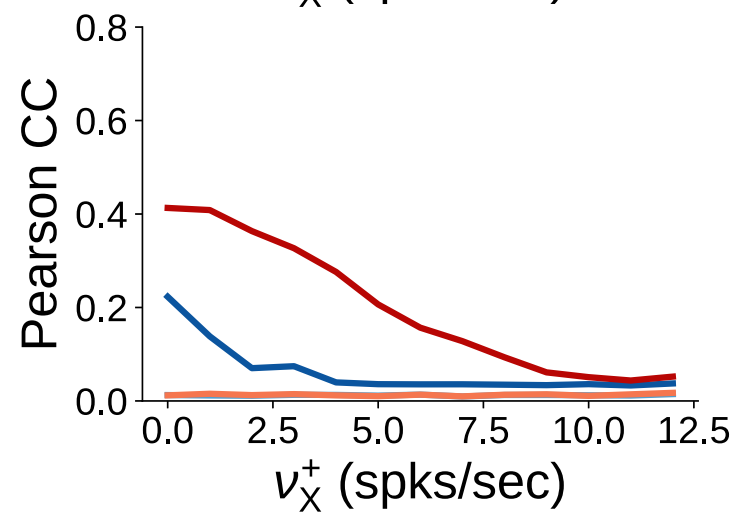

Supplement: supp [file elife_poa_e77009_Figure_4_figure_supplement_1.pdf › elife_poa_e77009_Figure_4_figure_supplement_1.pdf]

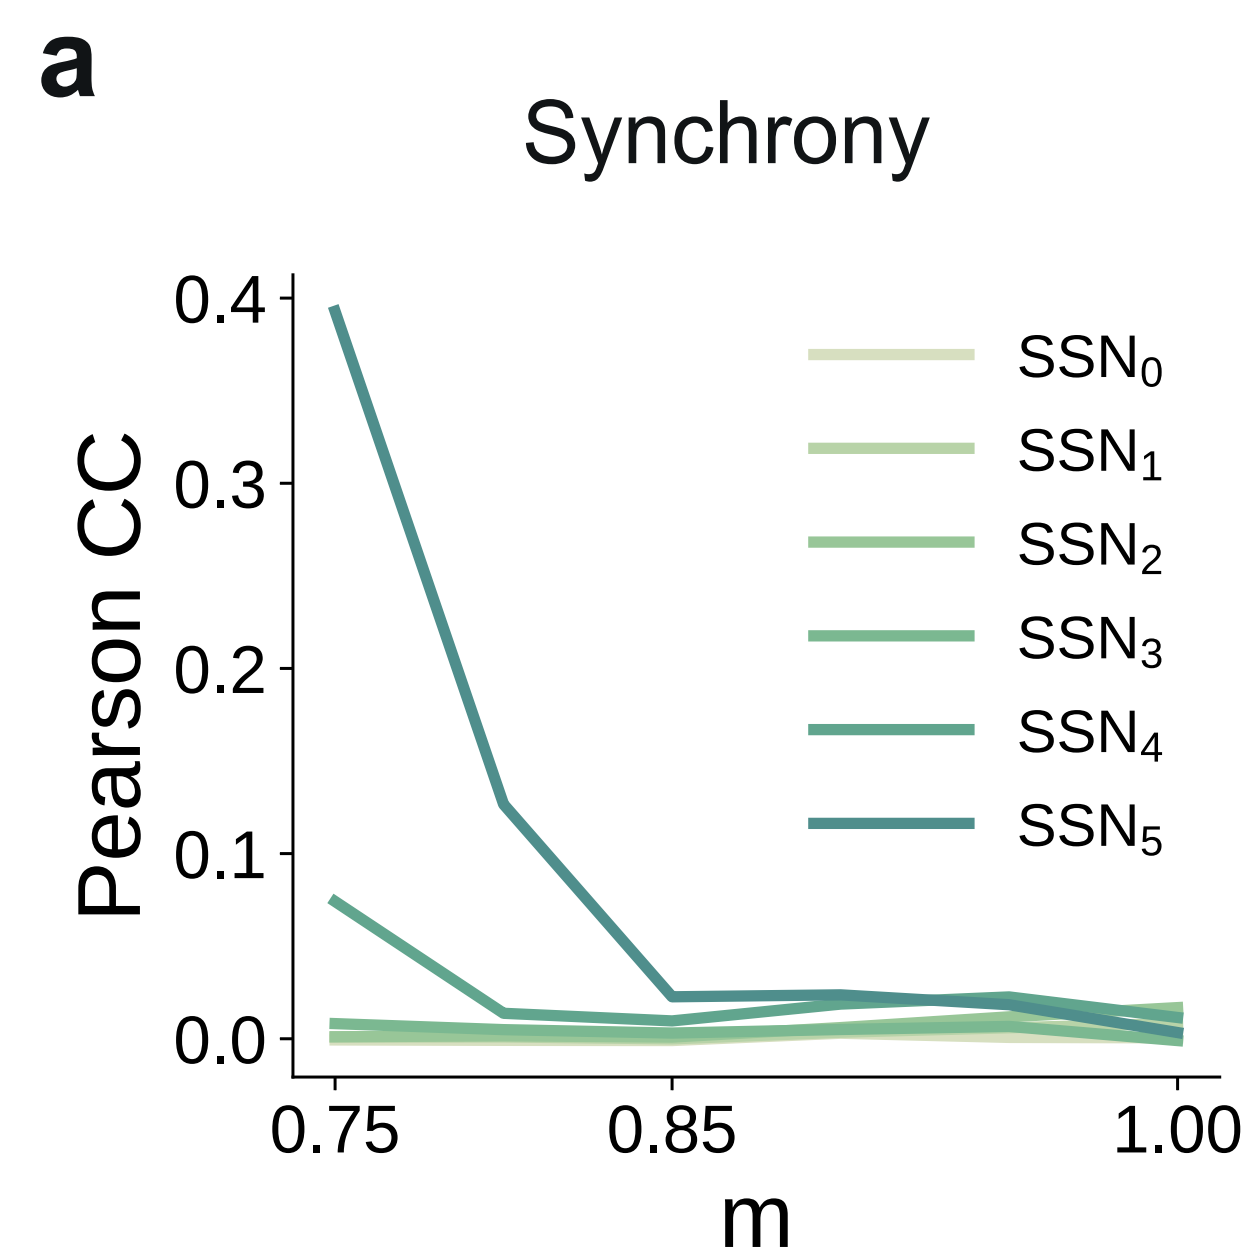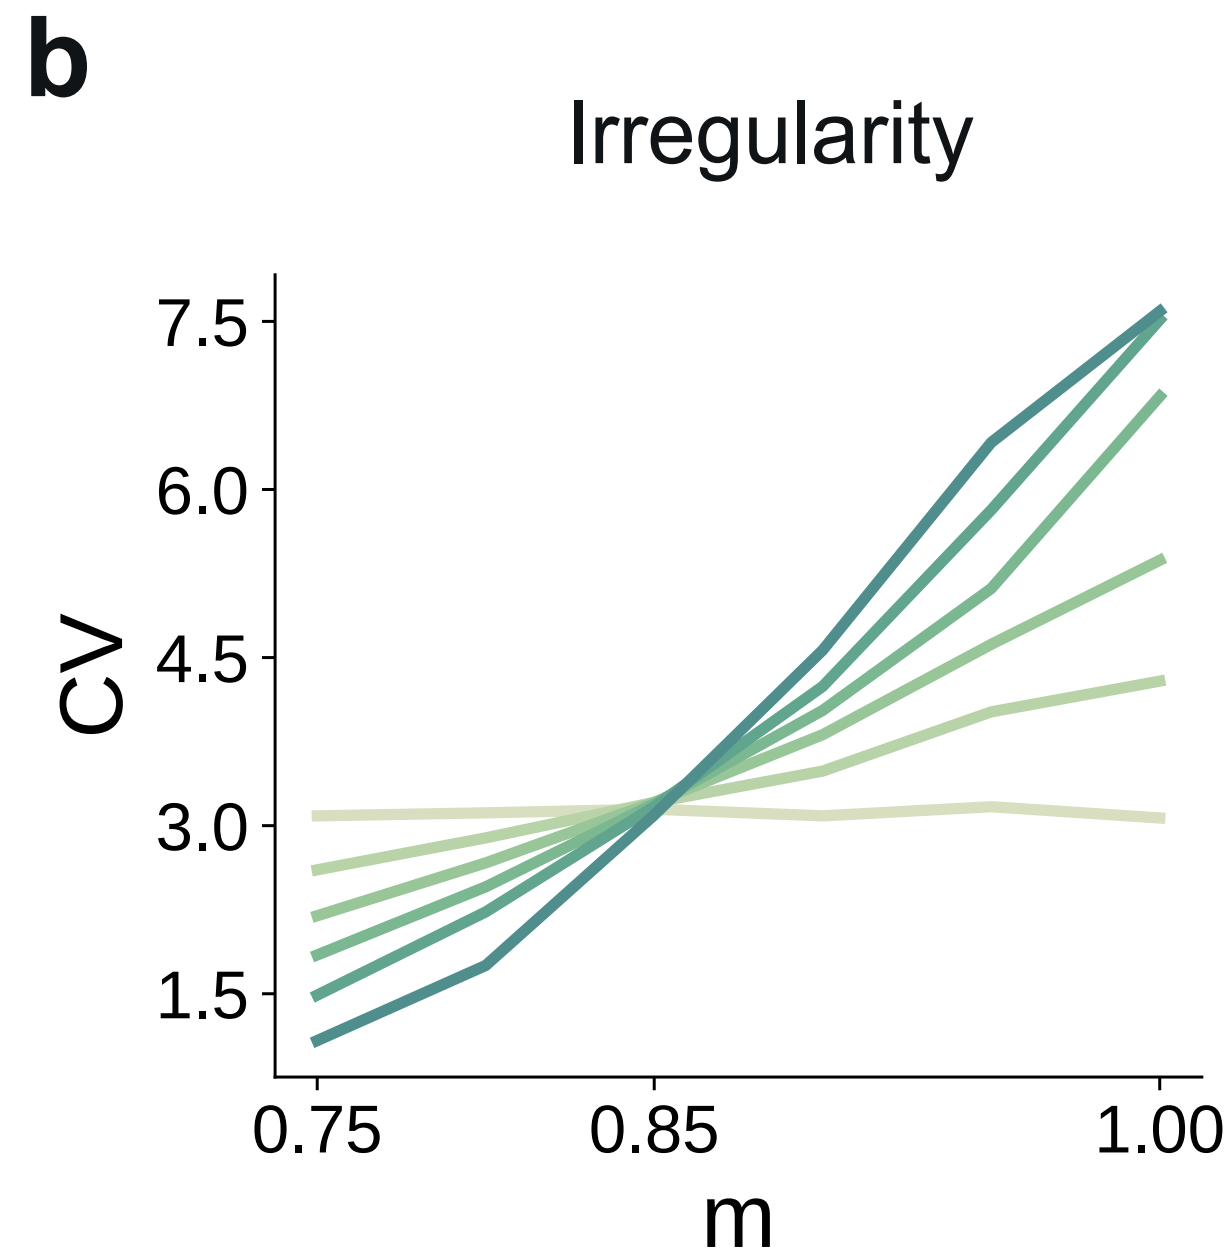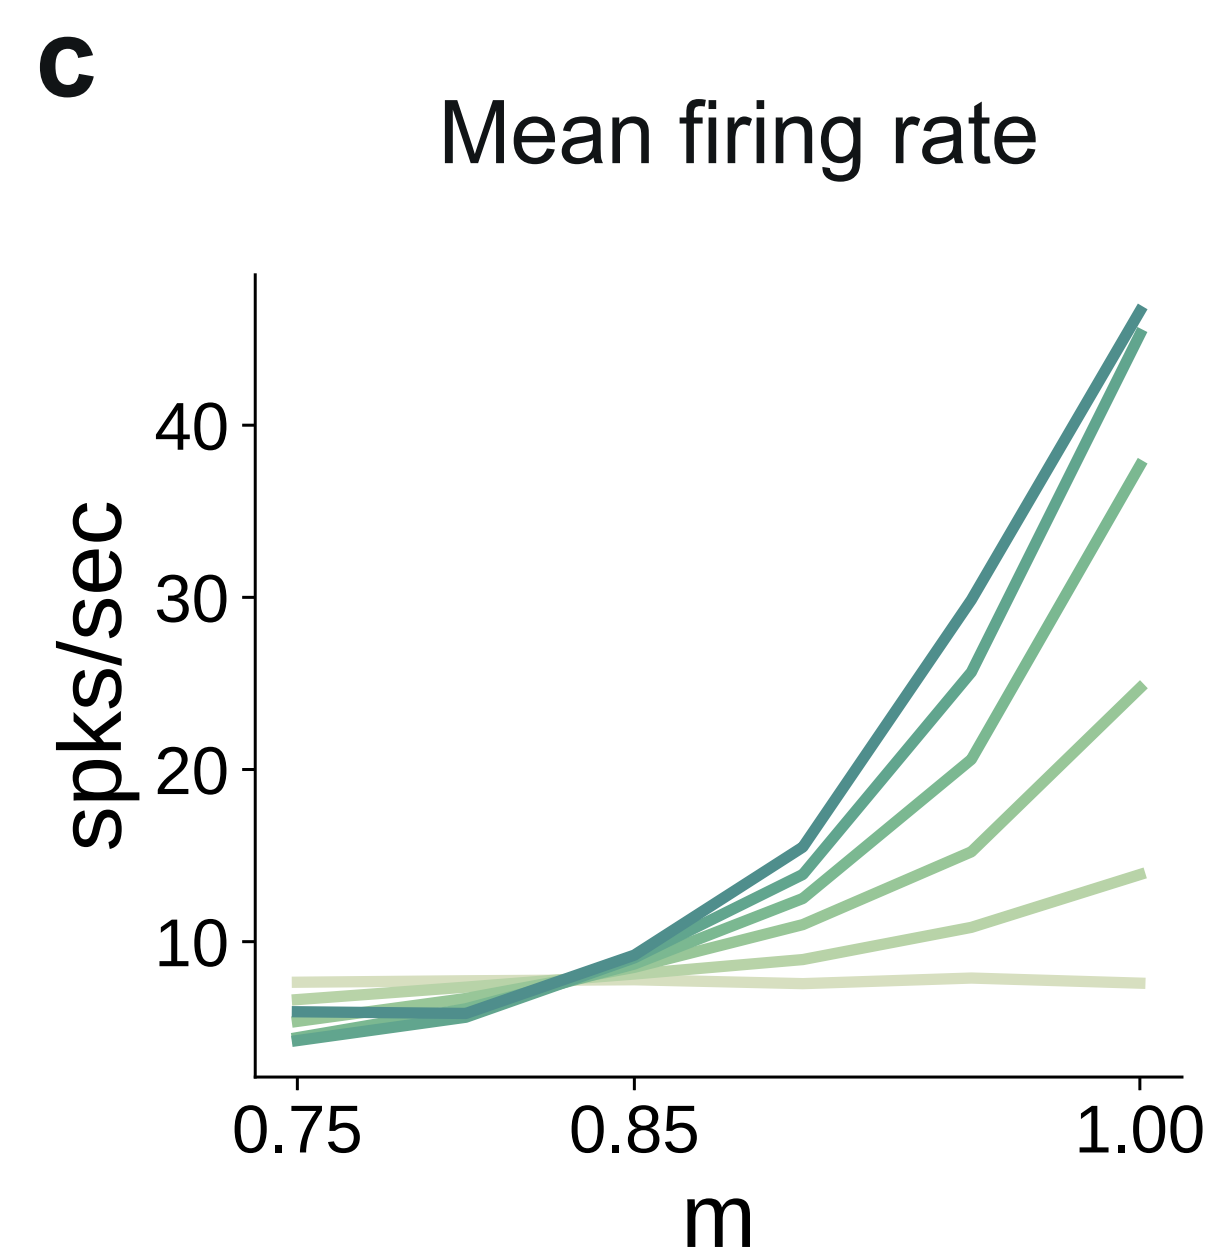

Supplement: supp [file elife_poa_e77009_Figure_5_figure_supplement_1.pdf › elife_poa_e77009_Figure_5_figure_supplement_1.pdf]

**a**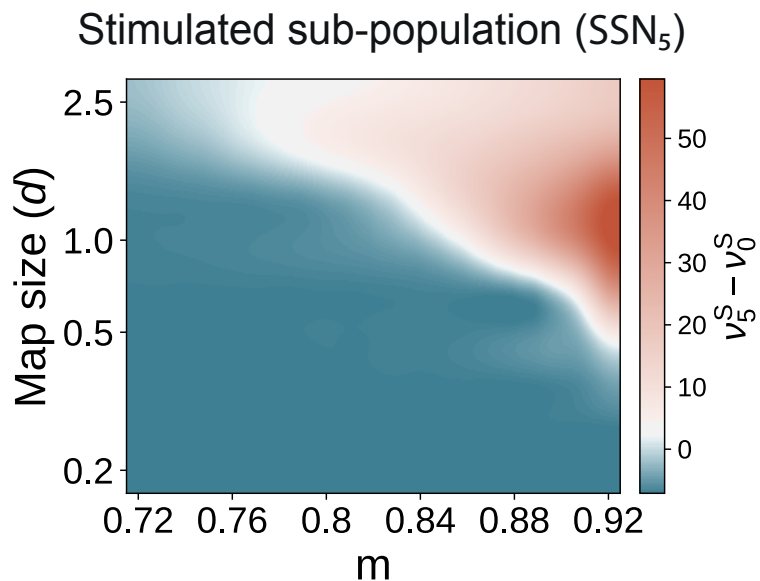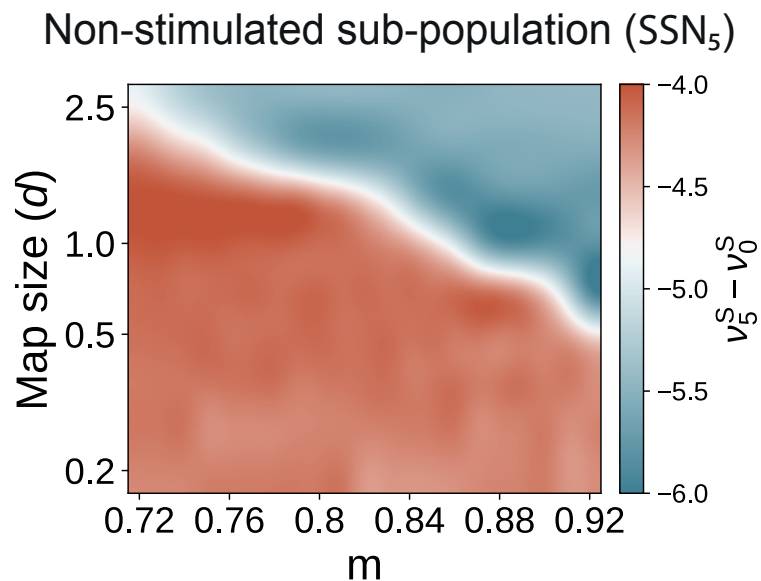**b** $d = 0.05$ 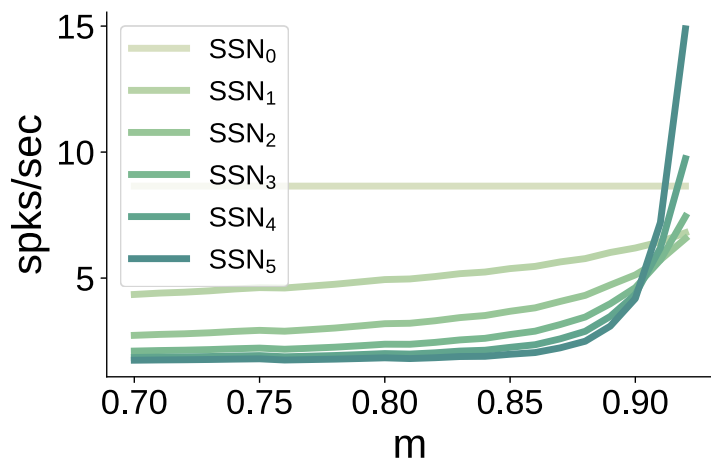 $d = 0.2$ 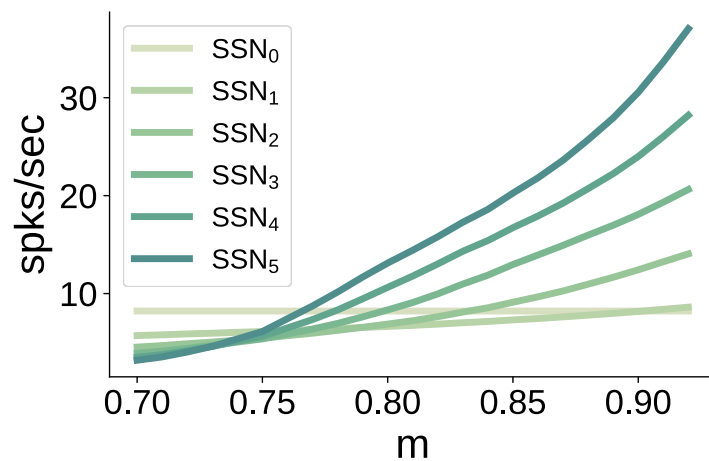

Supplement: supp [file elife_poa_e77009_Figure_6_figure_supplement_1.pdf › elife_poa_e77009_Figure_6_figure_supplement_1.pdf]

**a**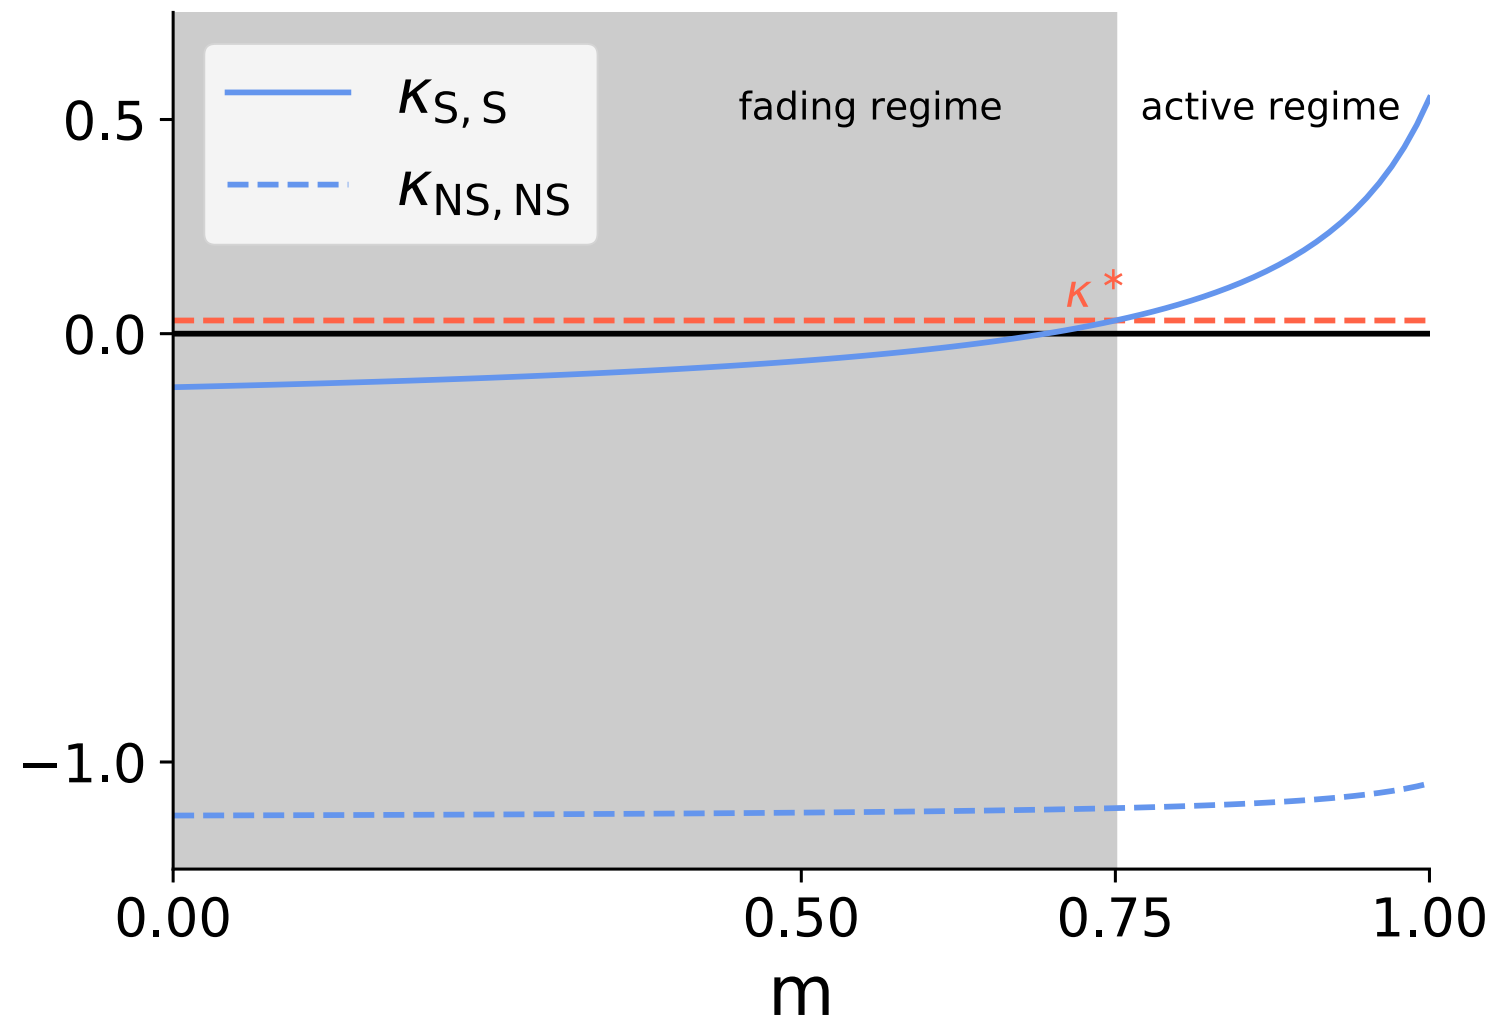**b**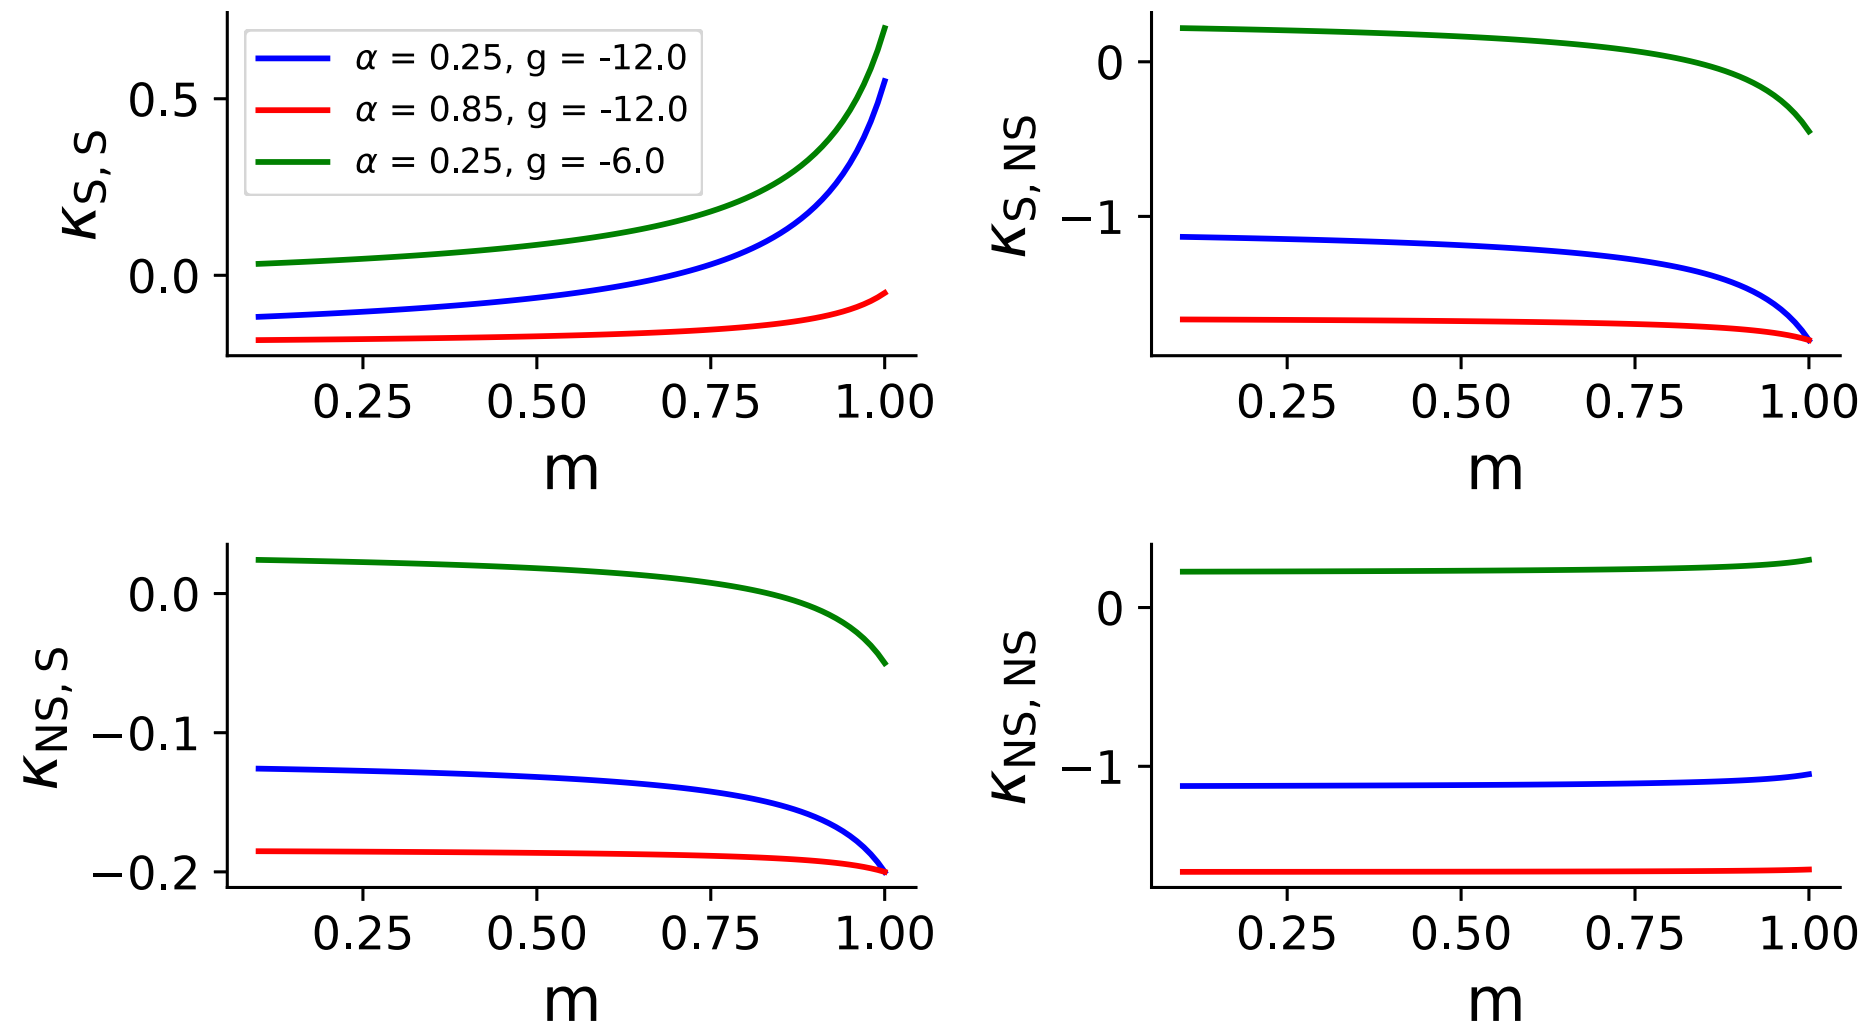

Supplement: supp [file elife_poa_e77009_Figure_7_figure_supplement_1.pdf › elife_poa_e77009_Figure_7_figure_supplement_1.pdf]

**a**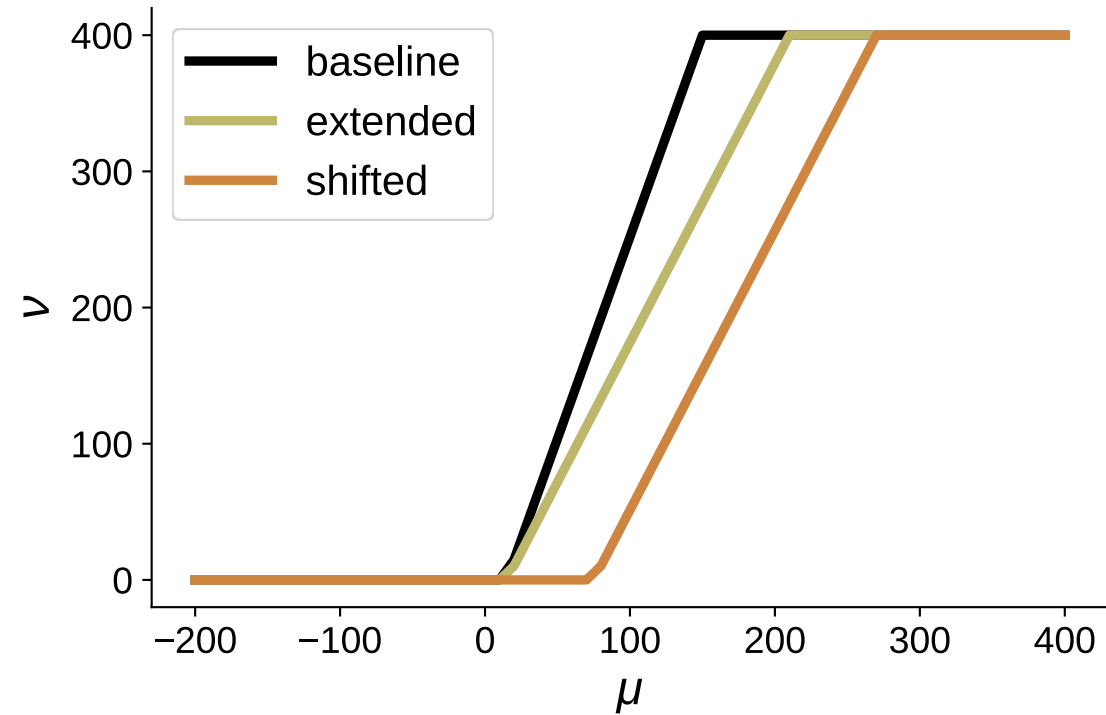**b**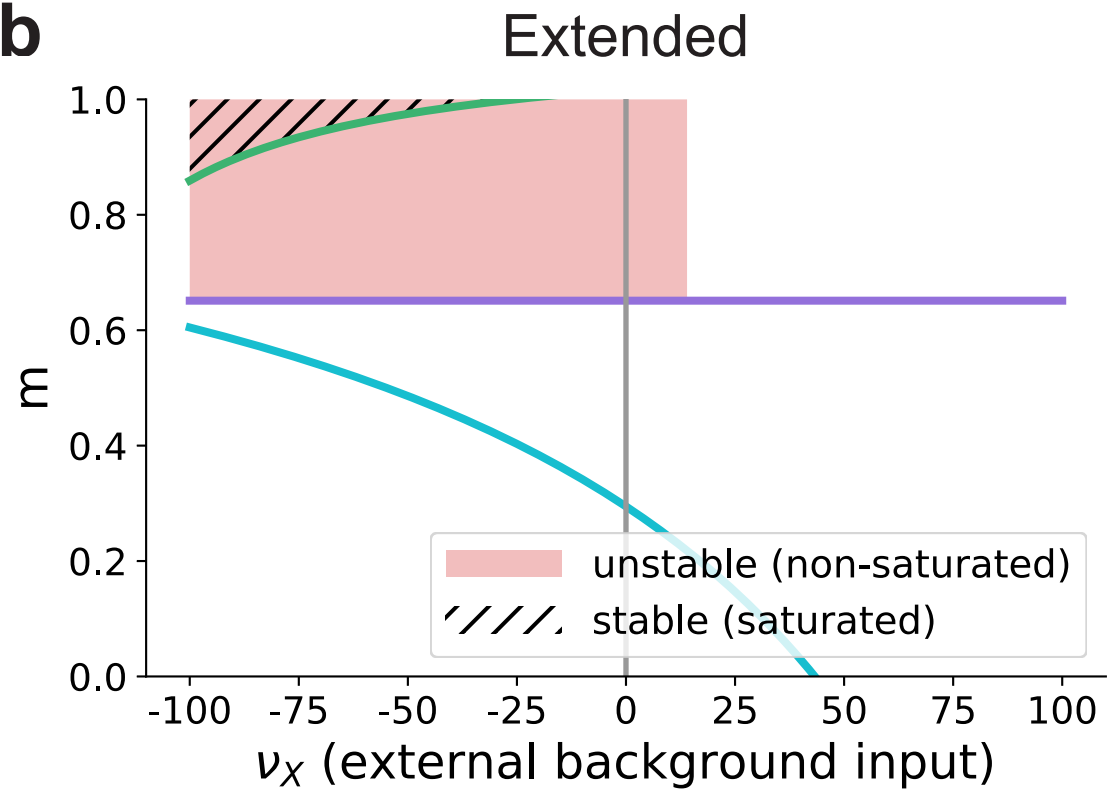**c**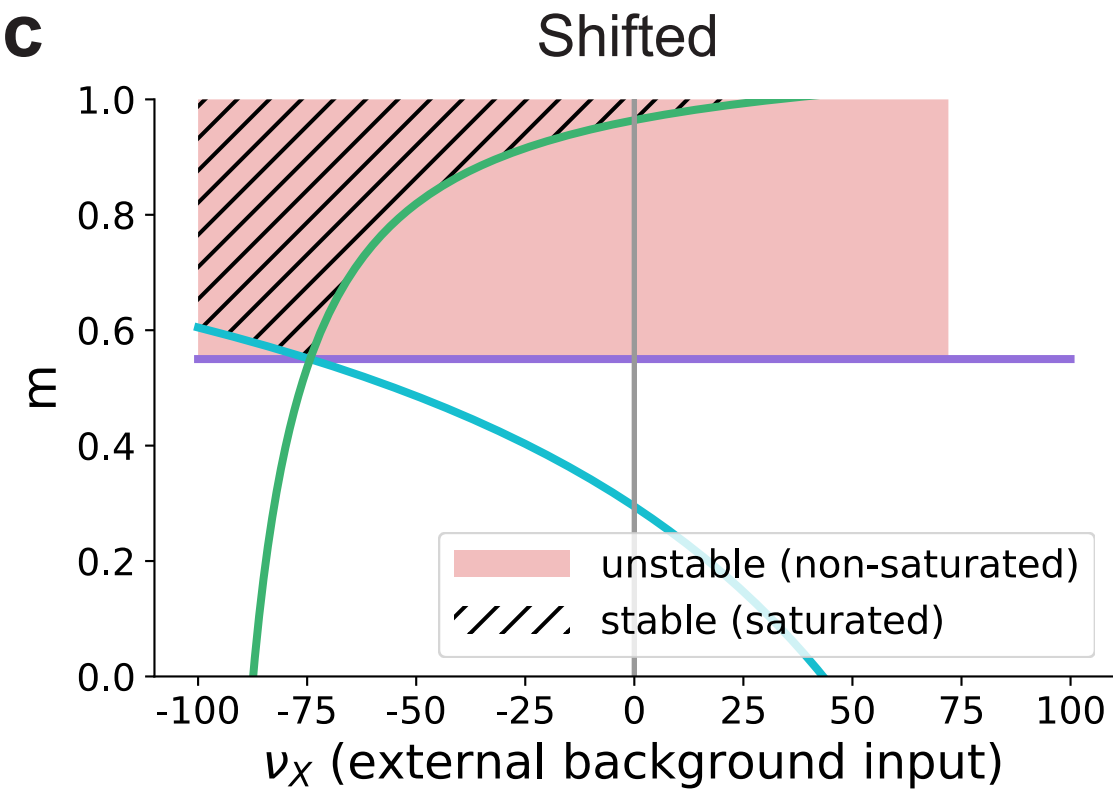

Supplement: supp [file elife_poa_e77009_Figure_8_figure_supplement_1.pdf › elife_poa_e77009_Figure_8_figure_supplement_1.pdf]

**a**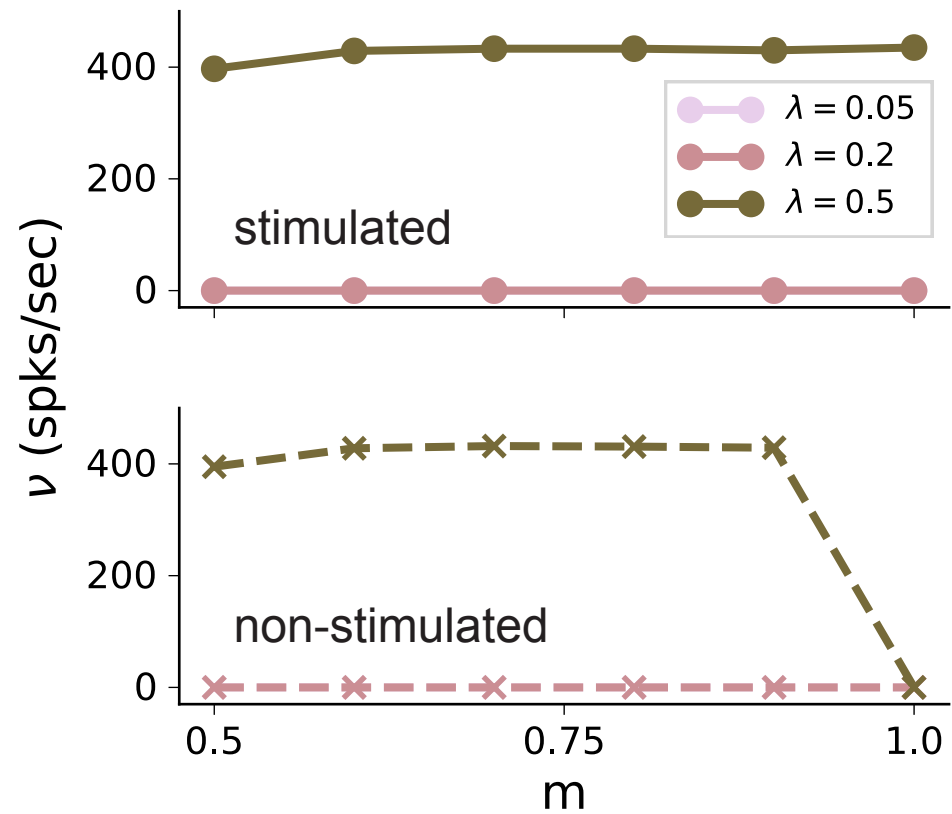**b**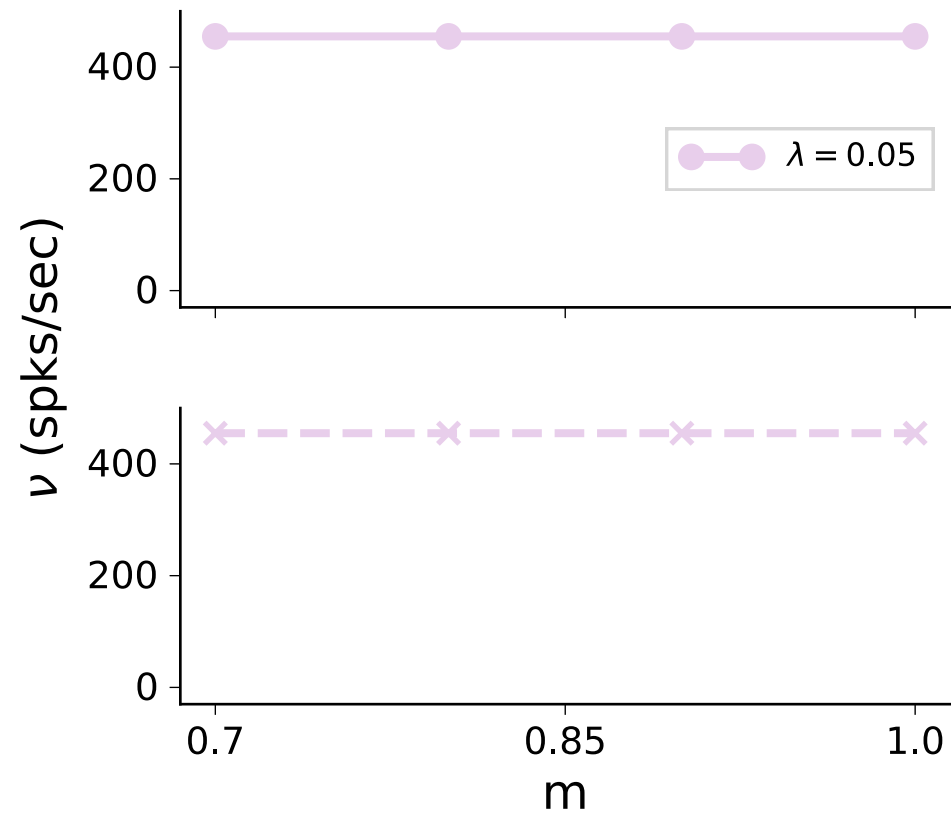

Supplement: supp [file elife_poa_e77009_Figure_8_figure_supplement_2.pdf › elife_poa_e77009_Figure_8_figure_supplement_2.pdf]

$SSN_0$  $SSN_2$  $SSN_5$  $SSN_8$  $SSN_{11}$ 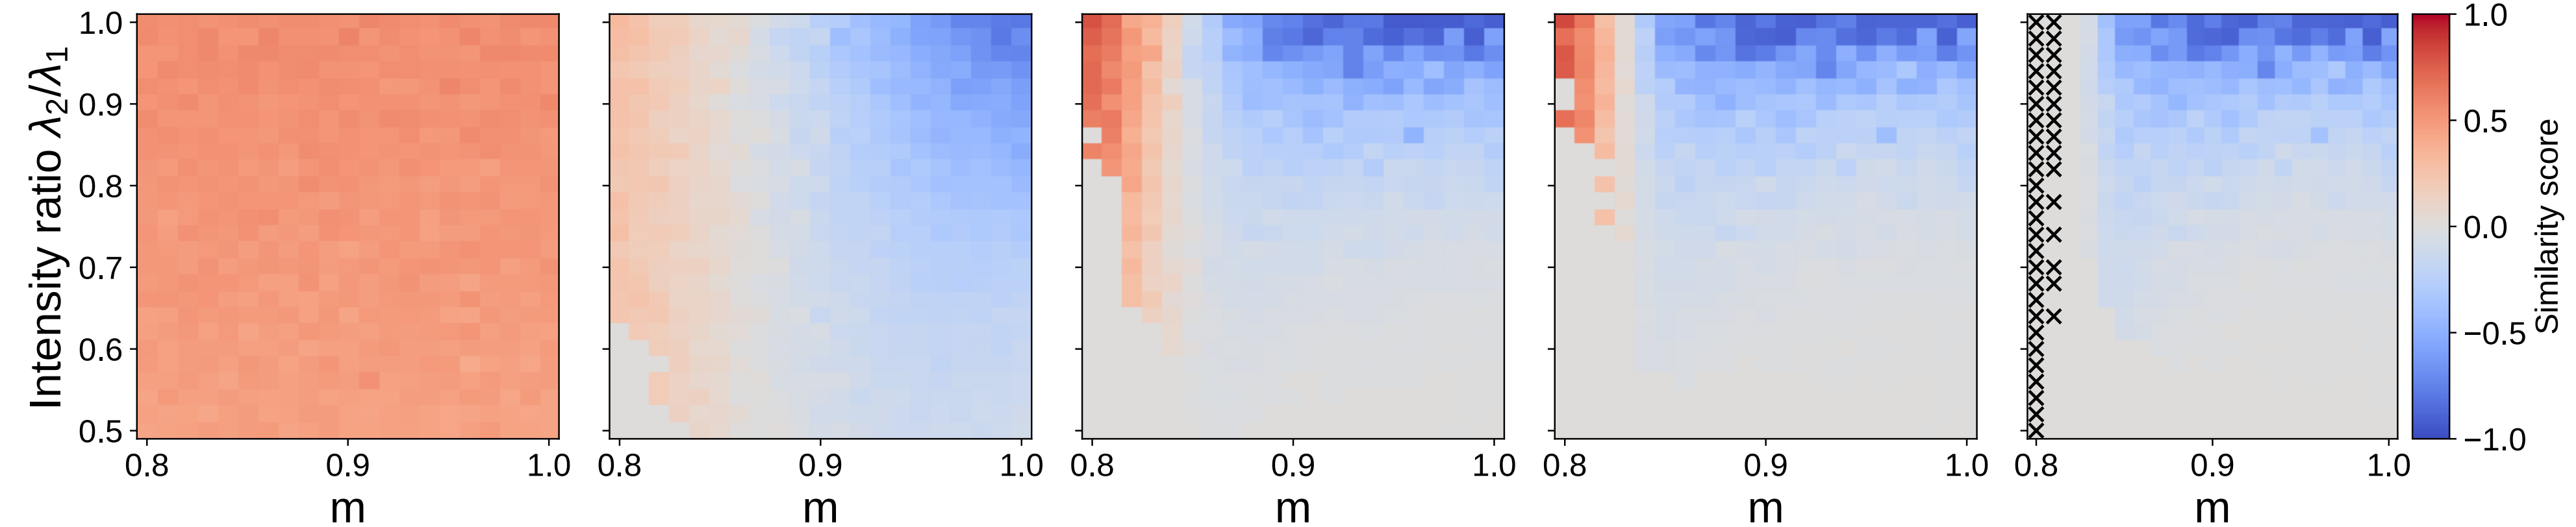

Supplement: supp [file elife_poa_e77009_Figure_9_figure_supplement_1.pdf › elife_poa_e77009_Figure_9_figure_supplement_1.pdf]

$m = 0.85$

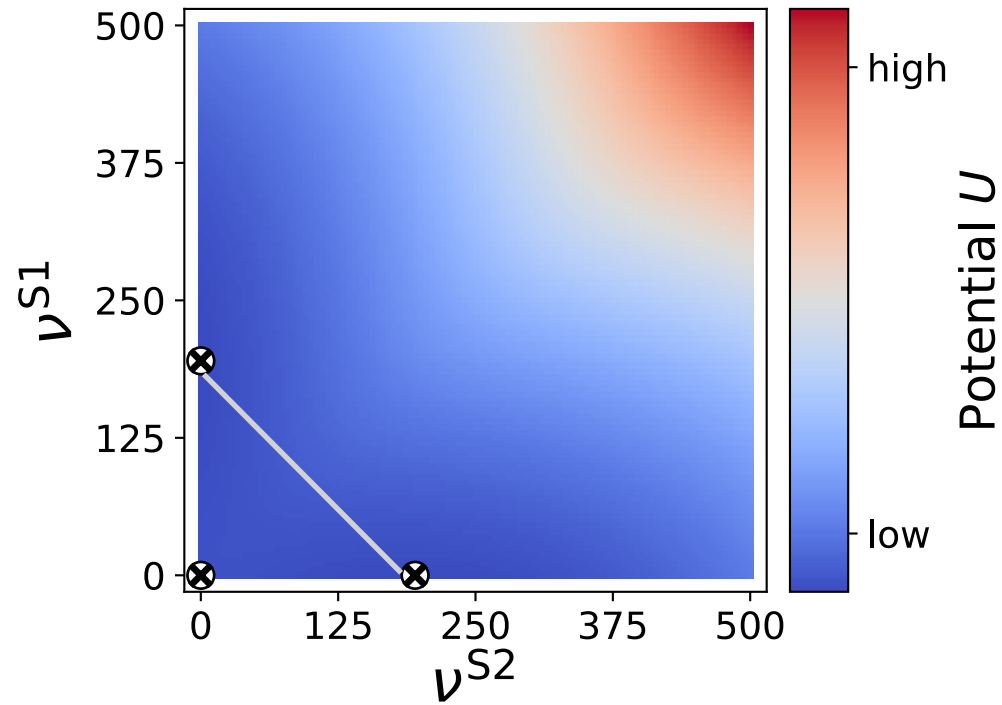

$m = 0.9$

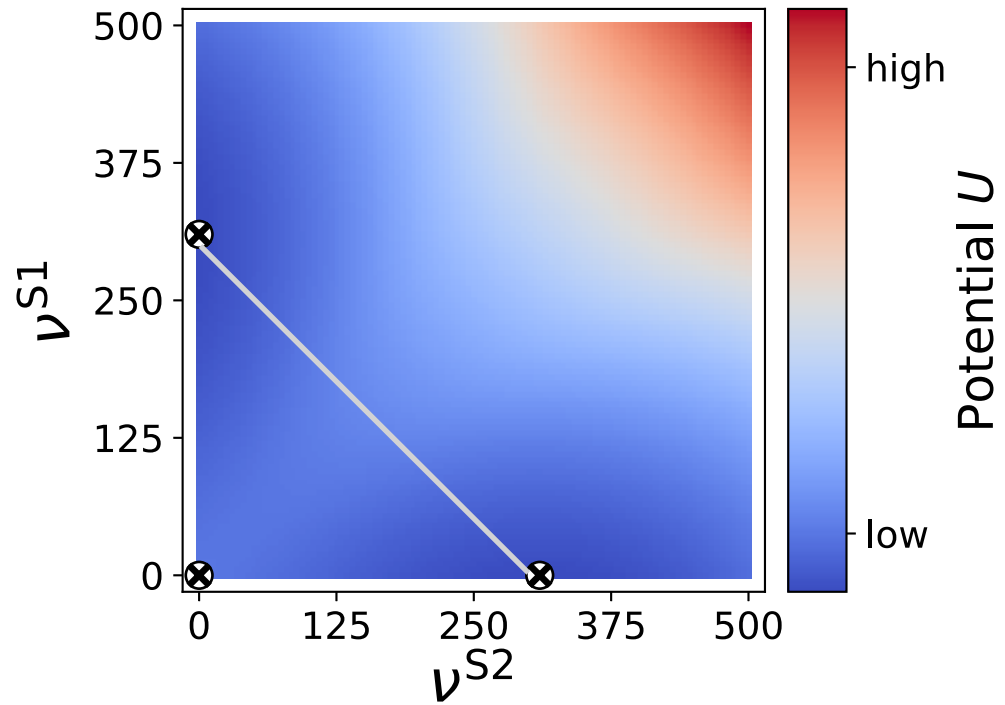

$m = 1.0$

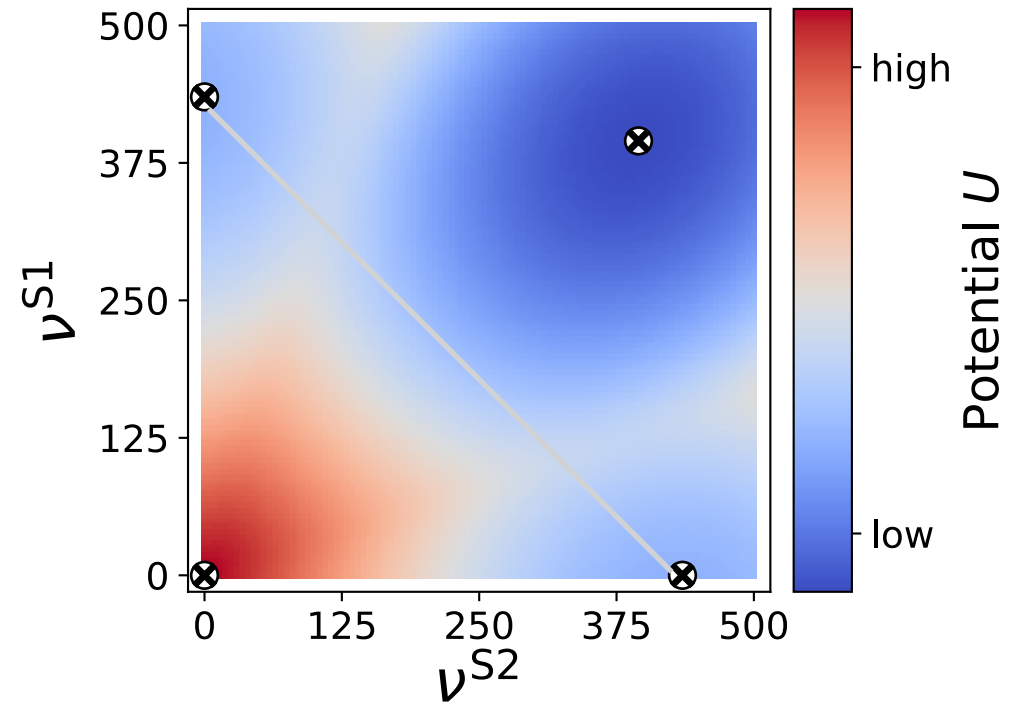

Supplement: supp [file elife_poa_e77009_Figure_9_figure_supplement_2.pdf › elife_poa_e77009_Figure_9_figure_supplement_2.pdf]

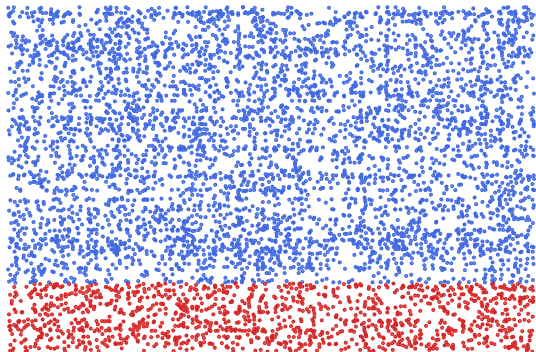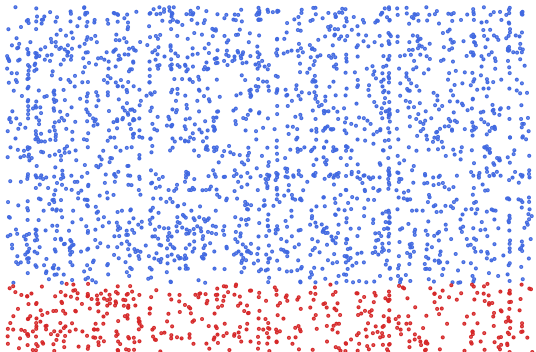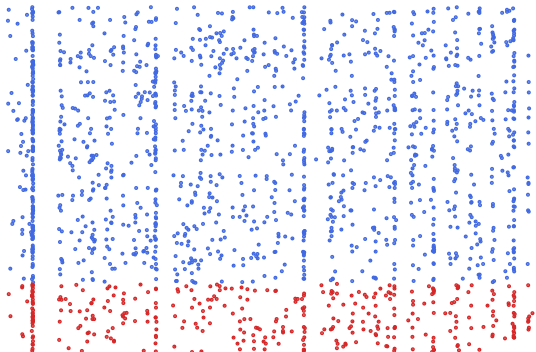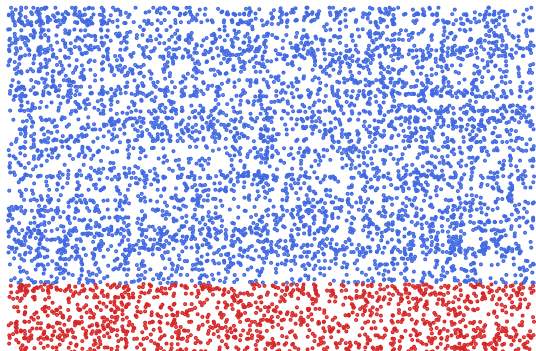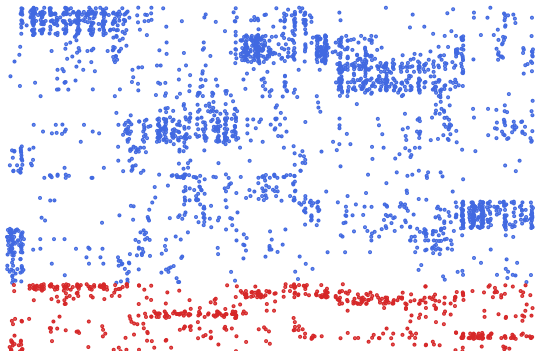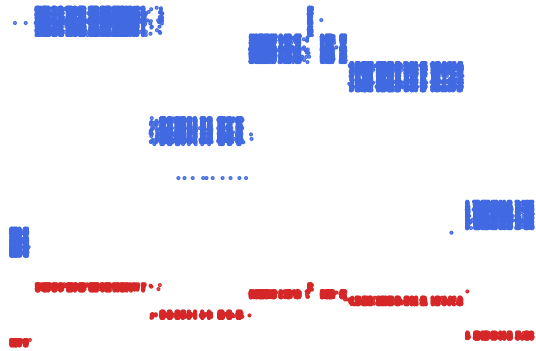

Supplement: supp [file fig2_a.pdf › figure2/plots/fig2_a.pdf]

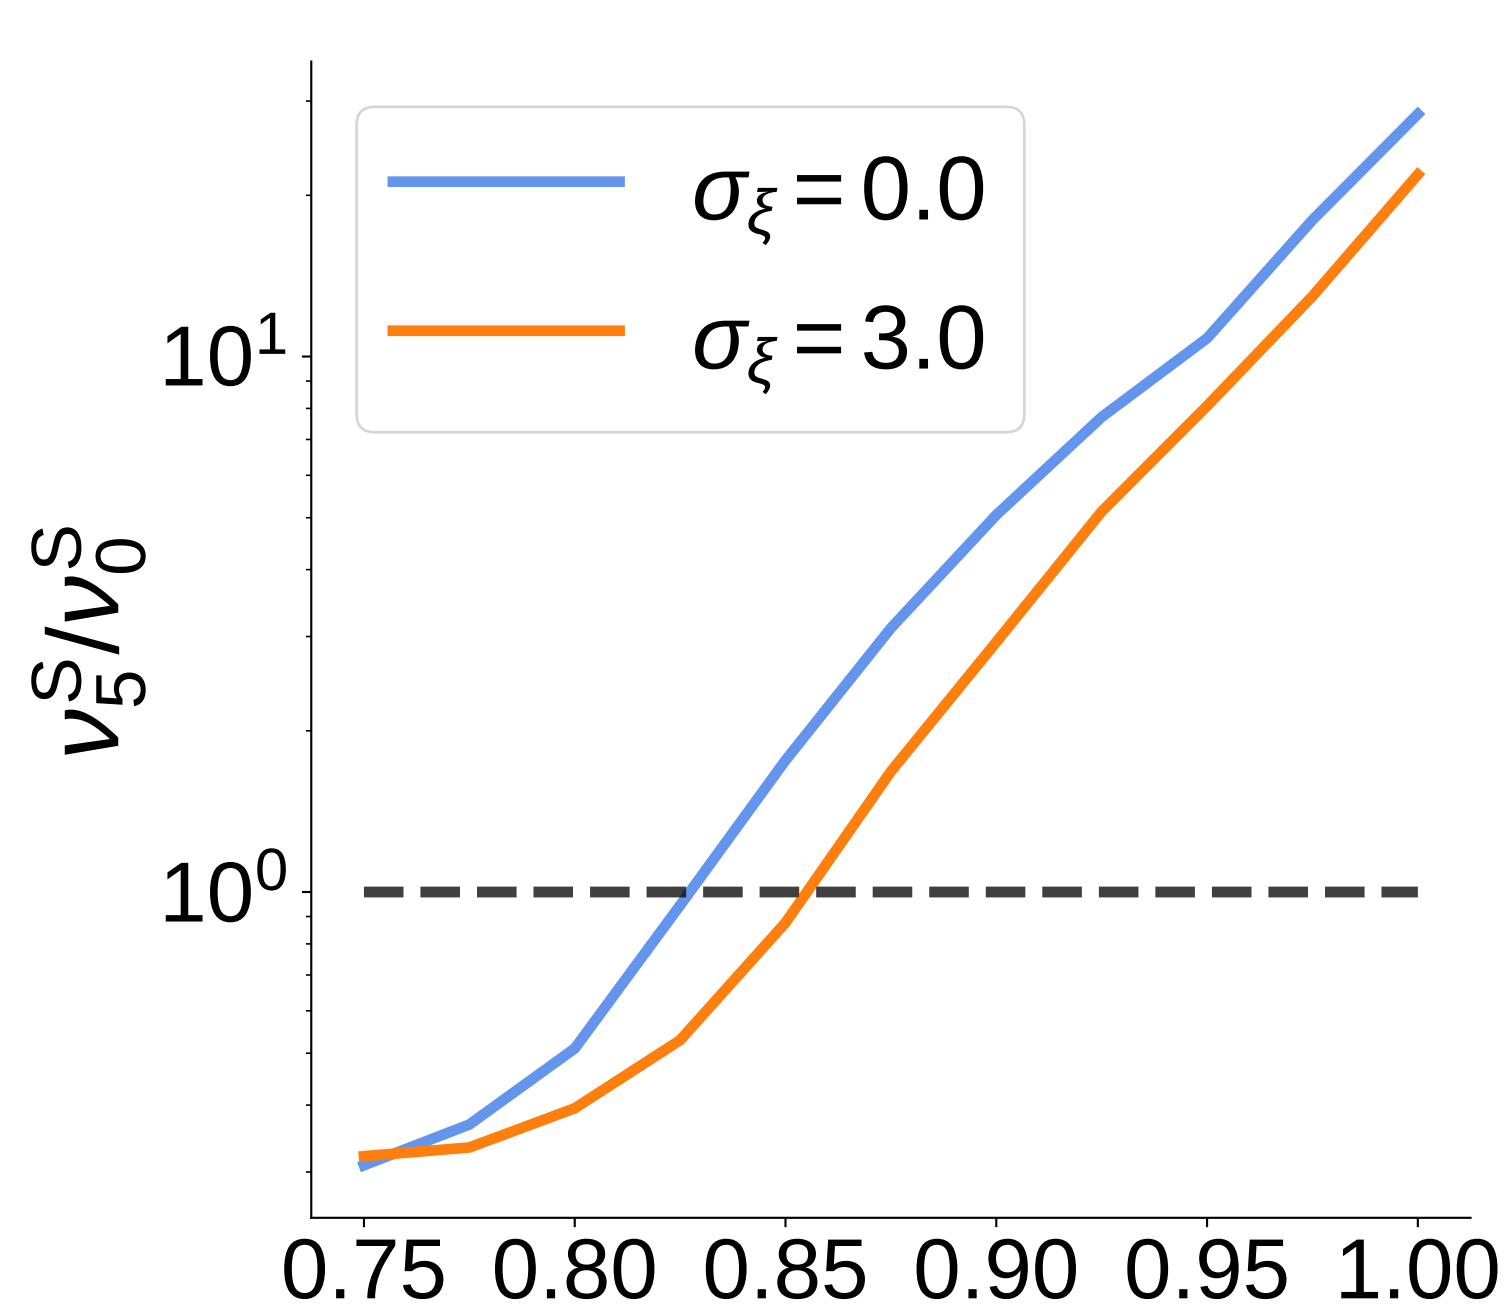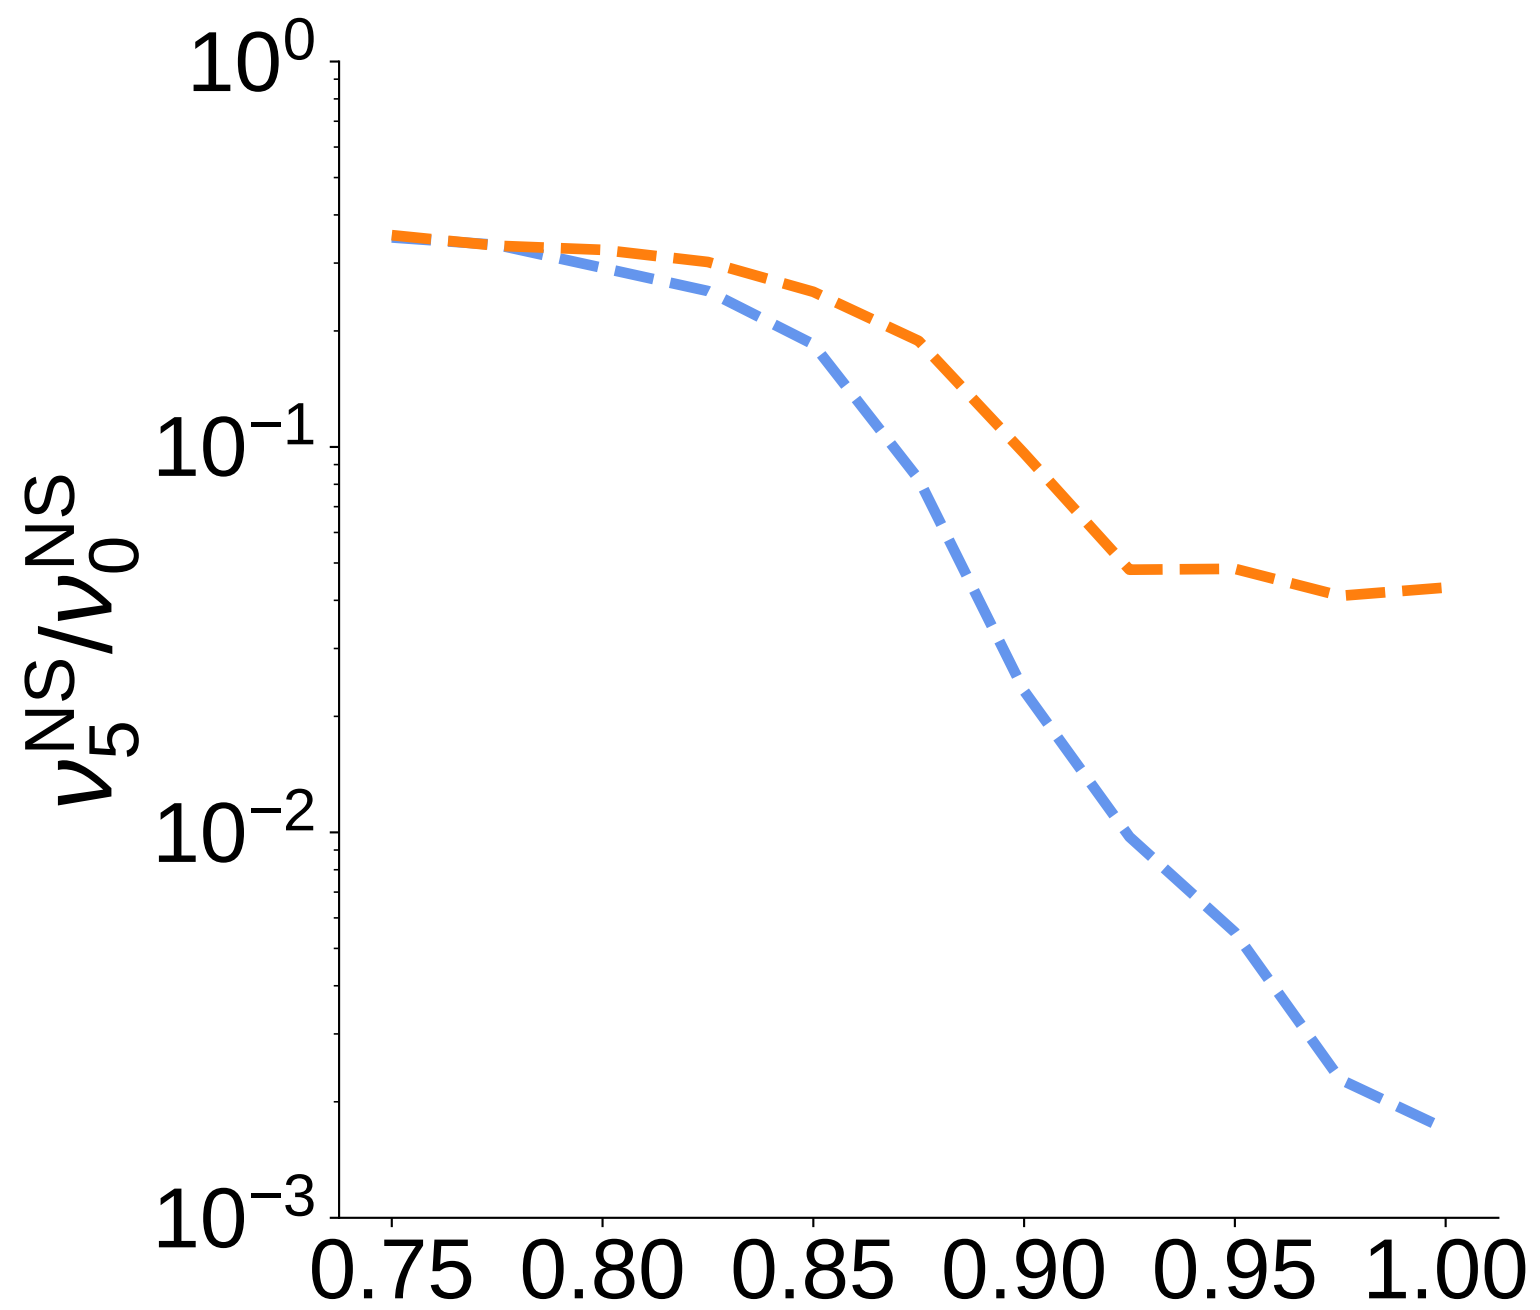

Supplement: supp [file fig2_b.pdf › figure2/plots/fig2_b.pdf]

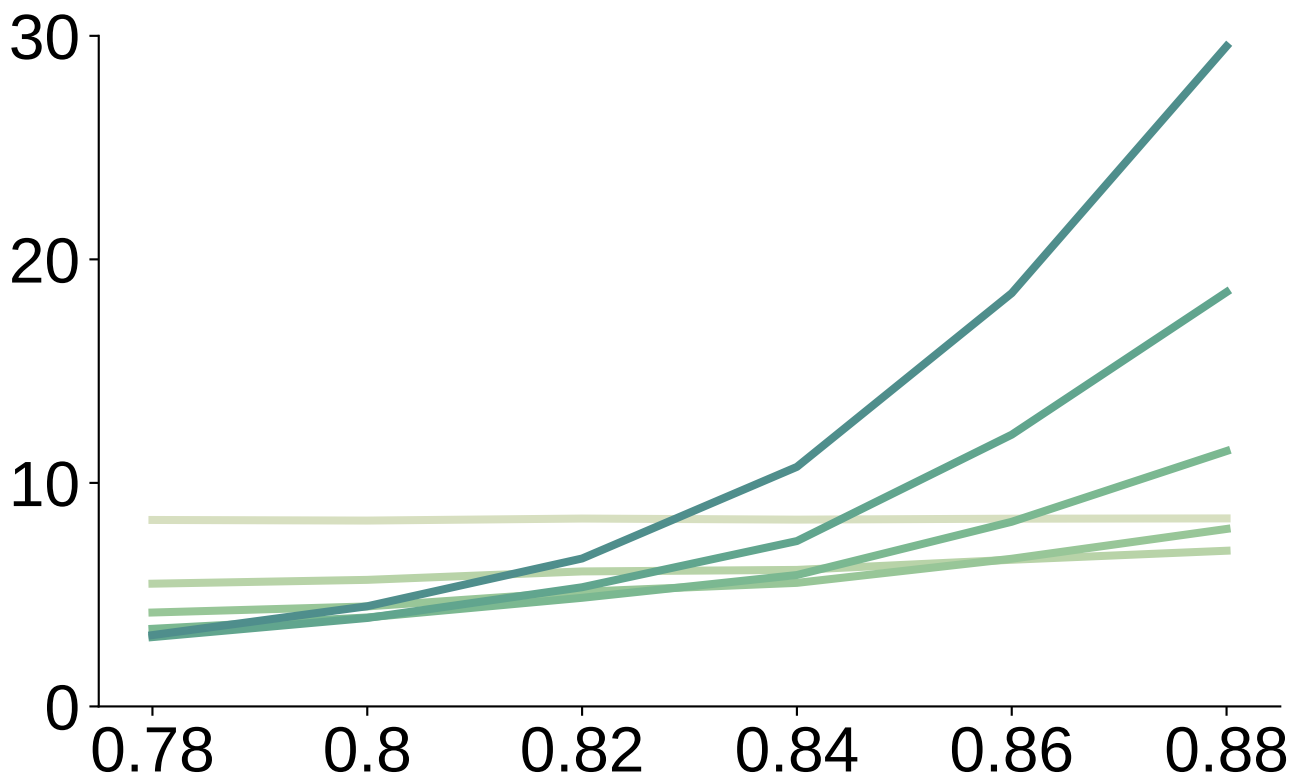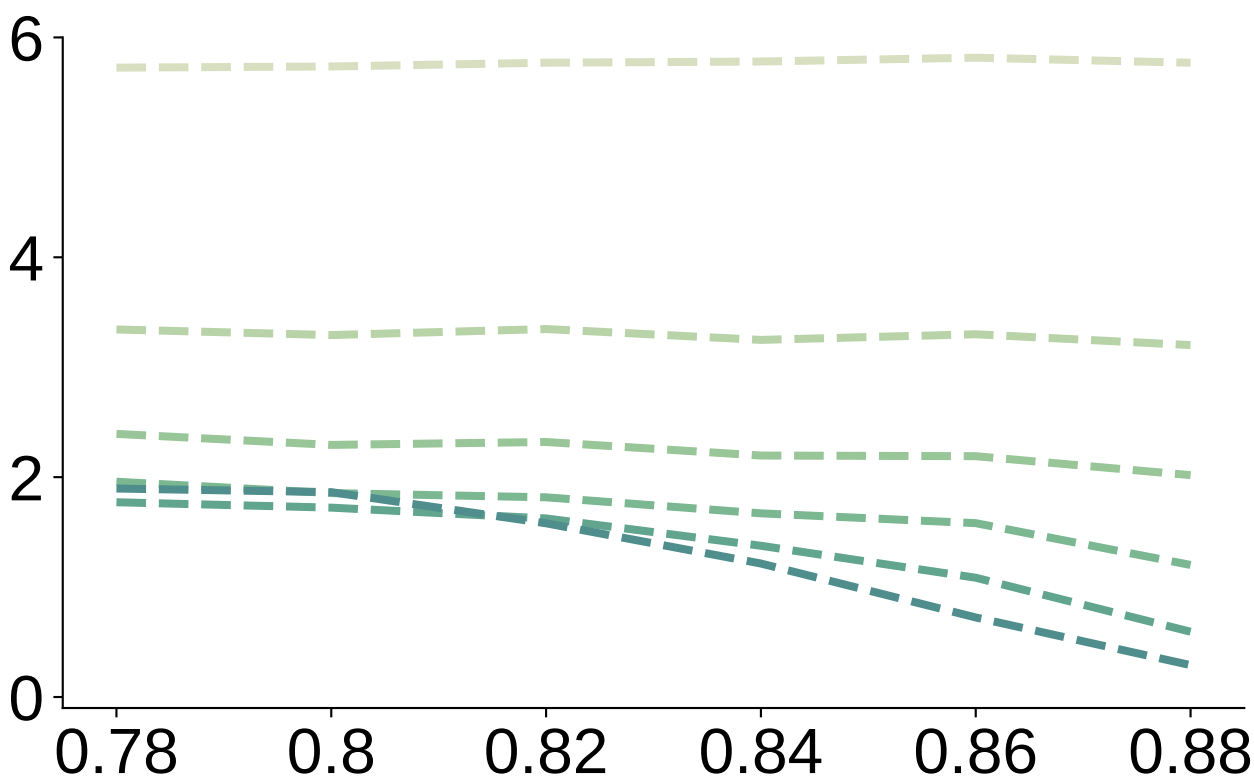

Supplement: supp [file fig2_c_sim.pdf › figure2/plots/fig2_c_sim.pdf]

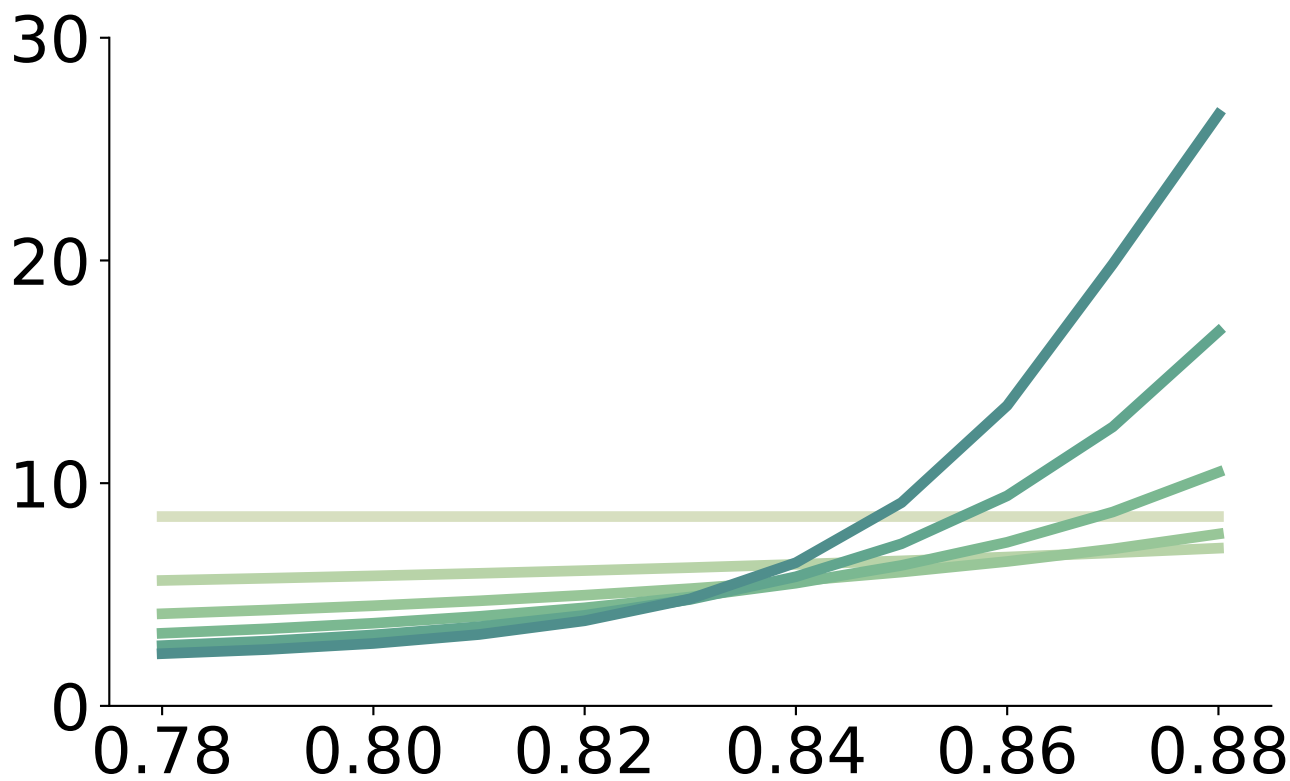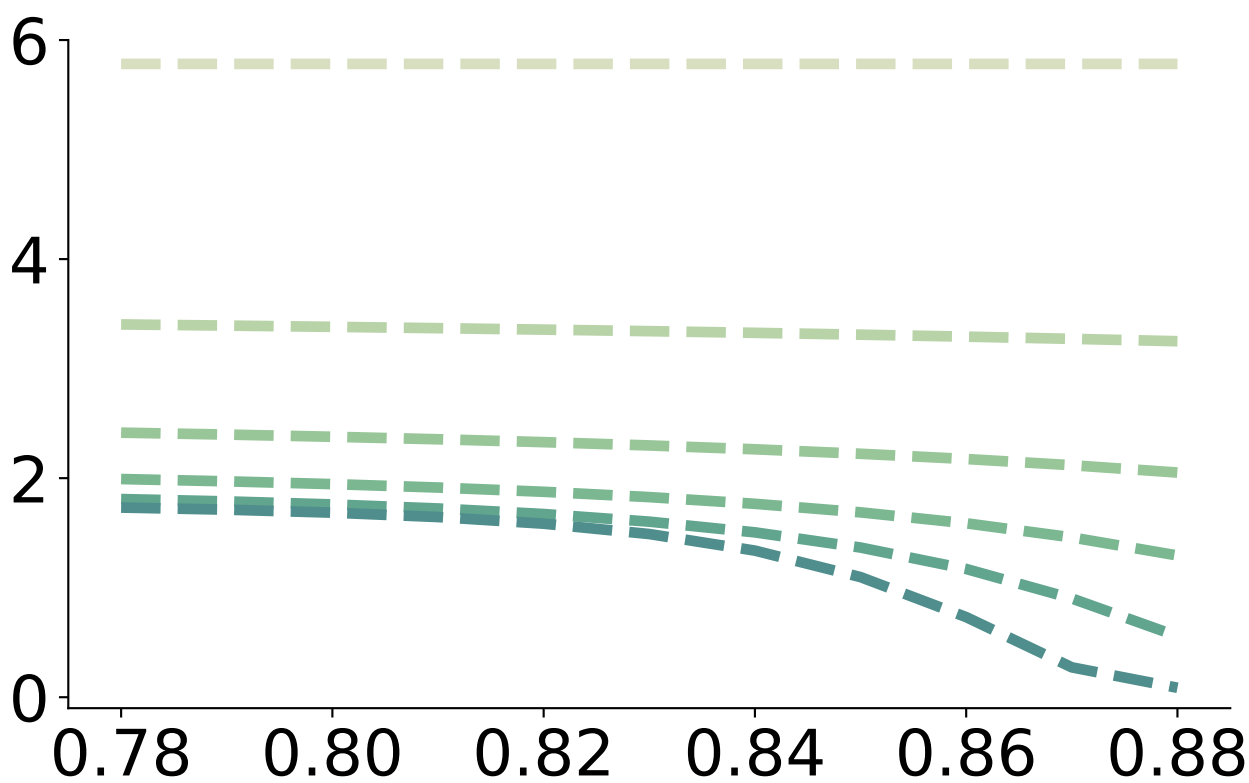

Supplement: supp [file fig2_c_theory.pdf › figure2/plots/fig2_c_theory.pdf]

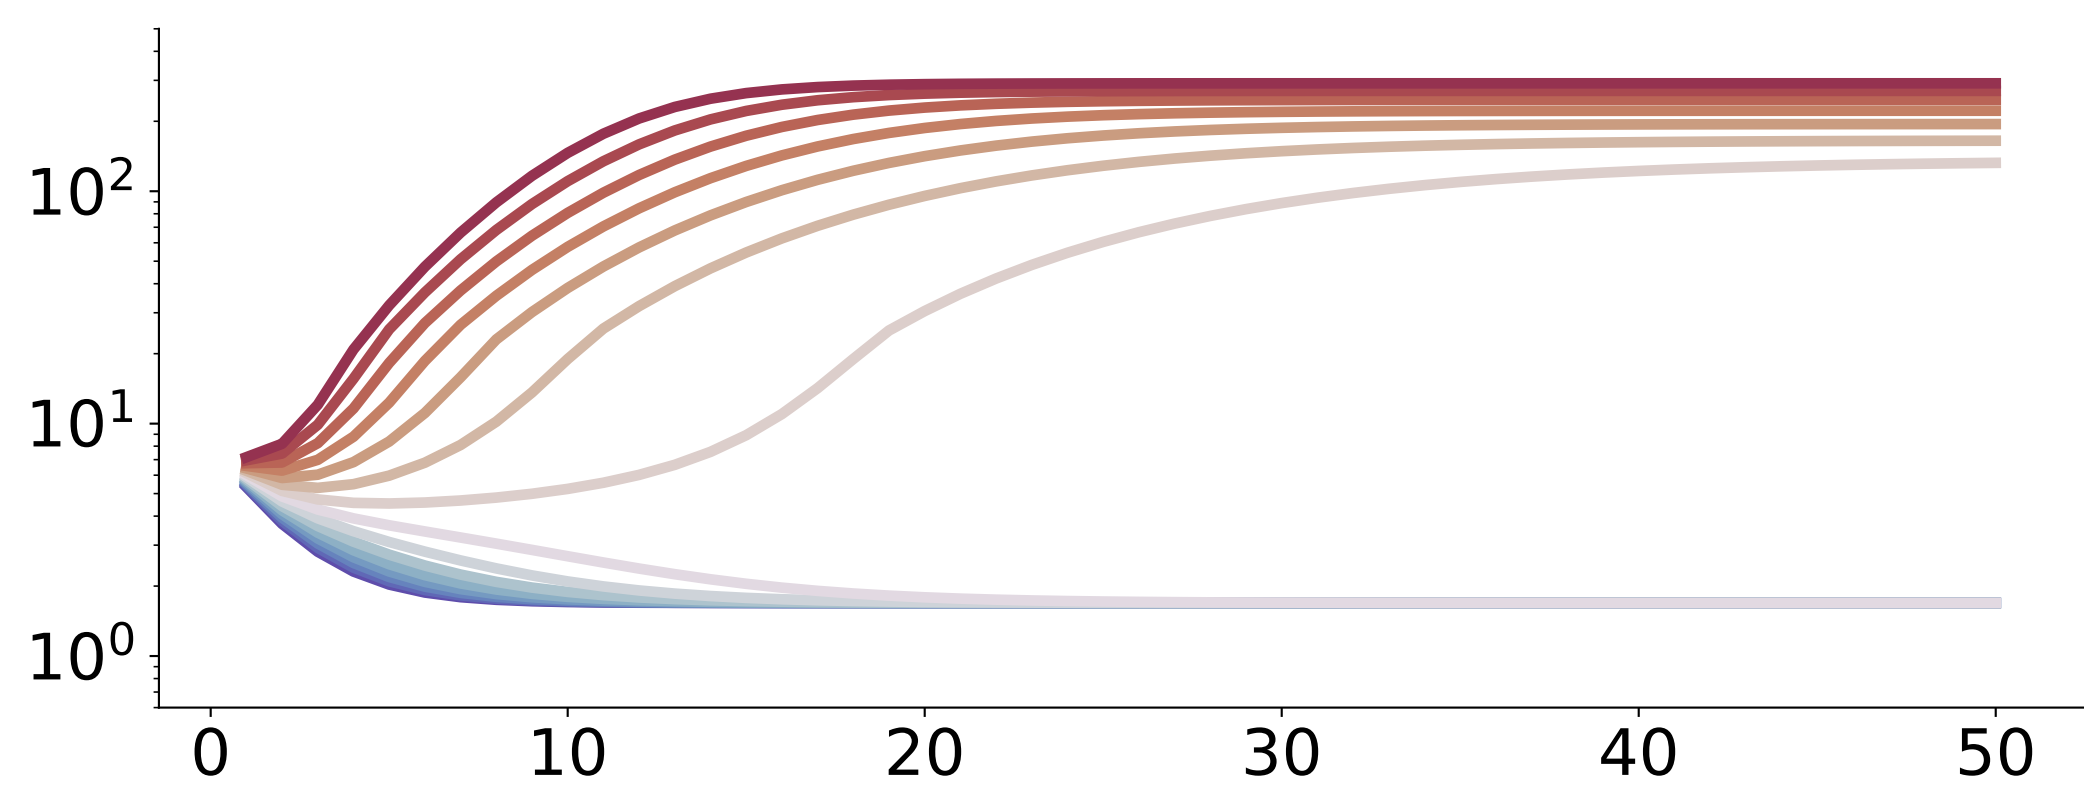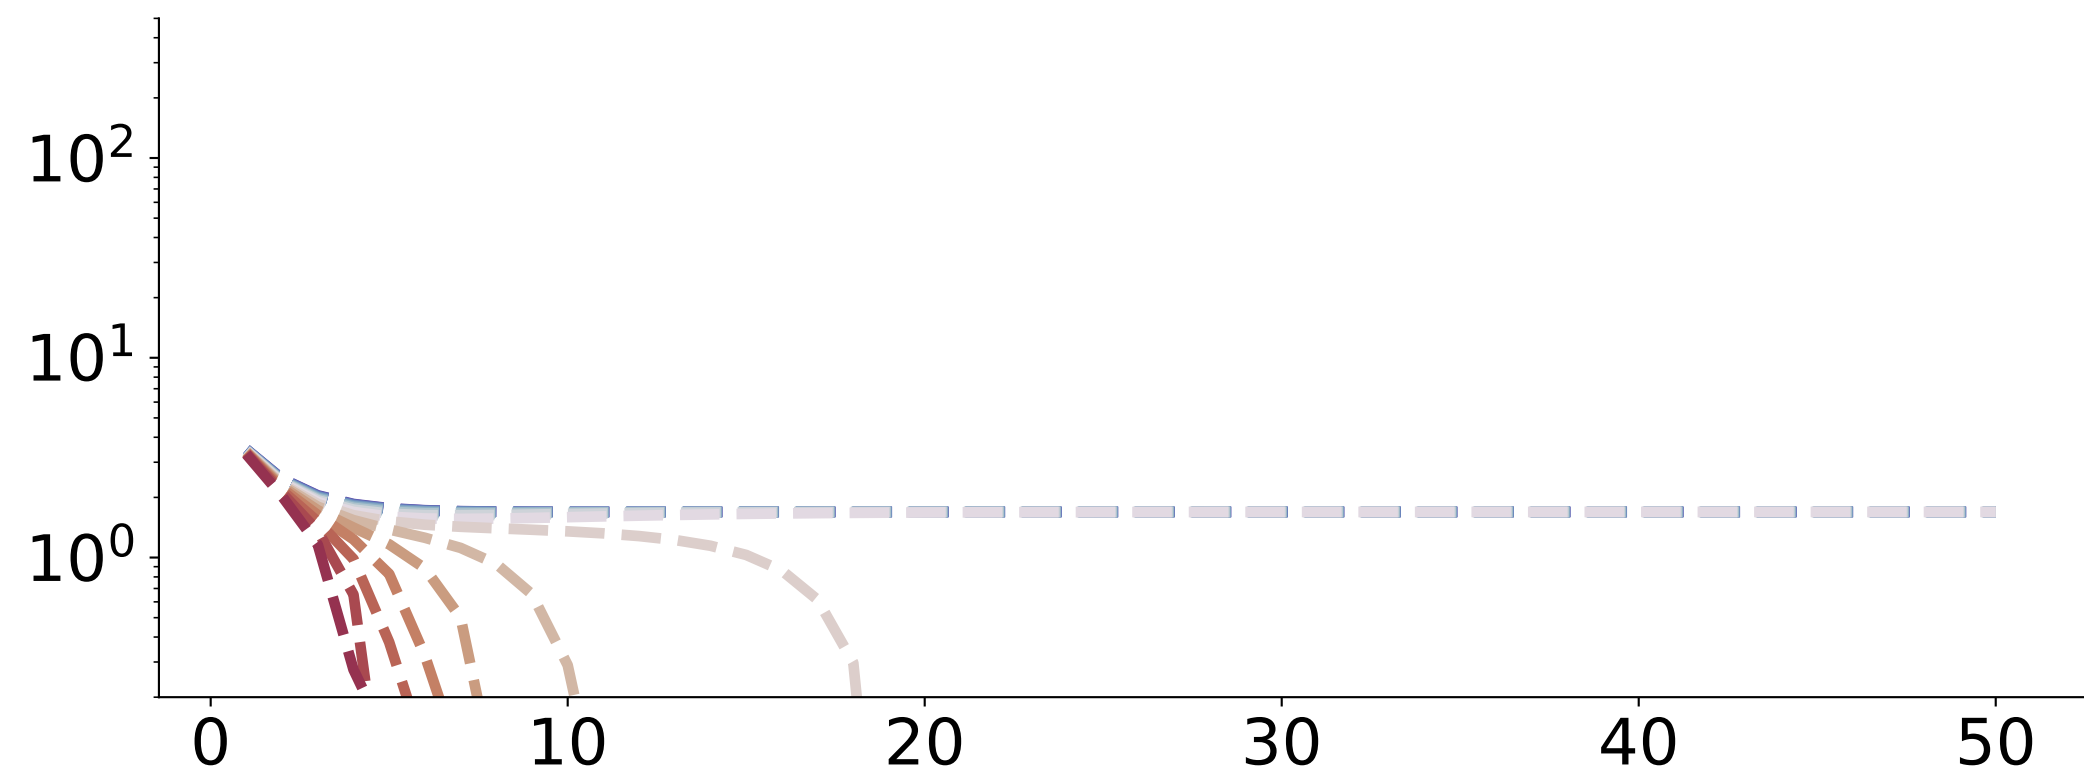

Supplement: supp [file fig2_d.pdf › figure2/plots/fig2_d.pdf]

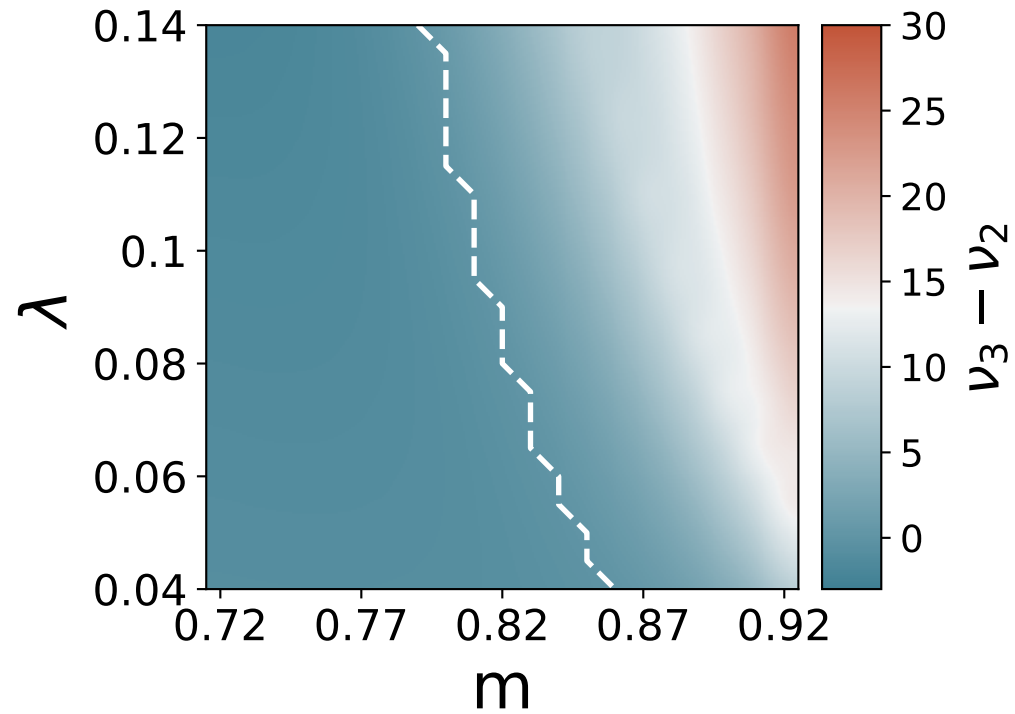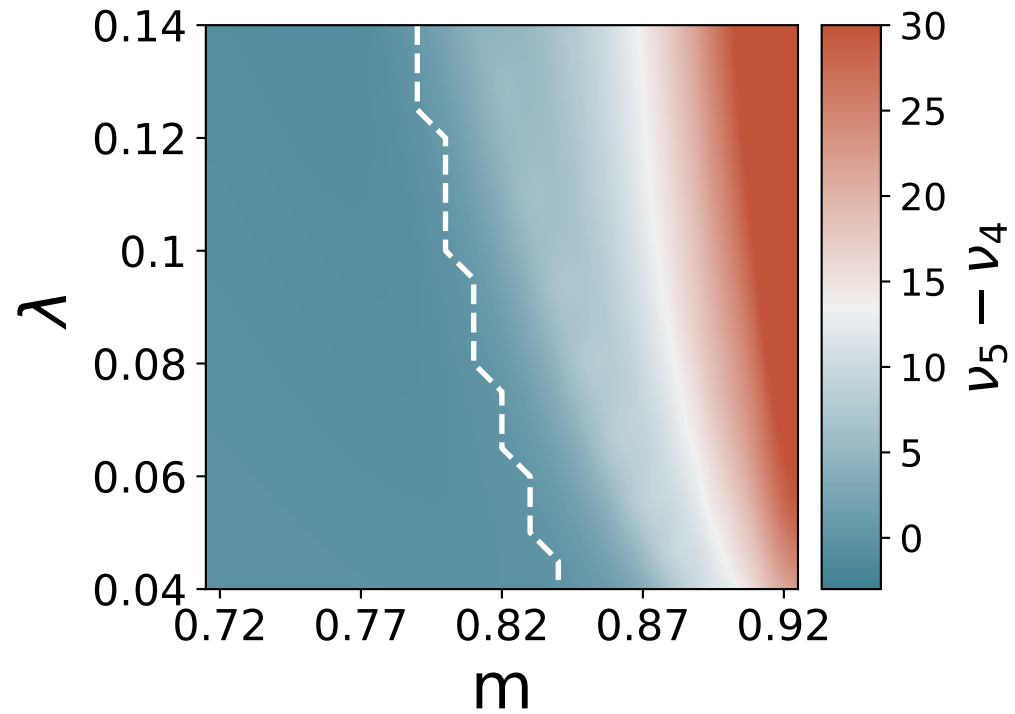

Supplement: supp [file fig2_s1.pdf › figure2/plots/fig2_s1.pdf]

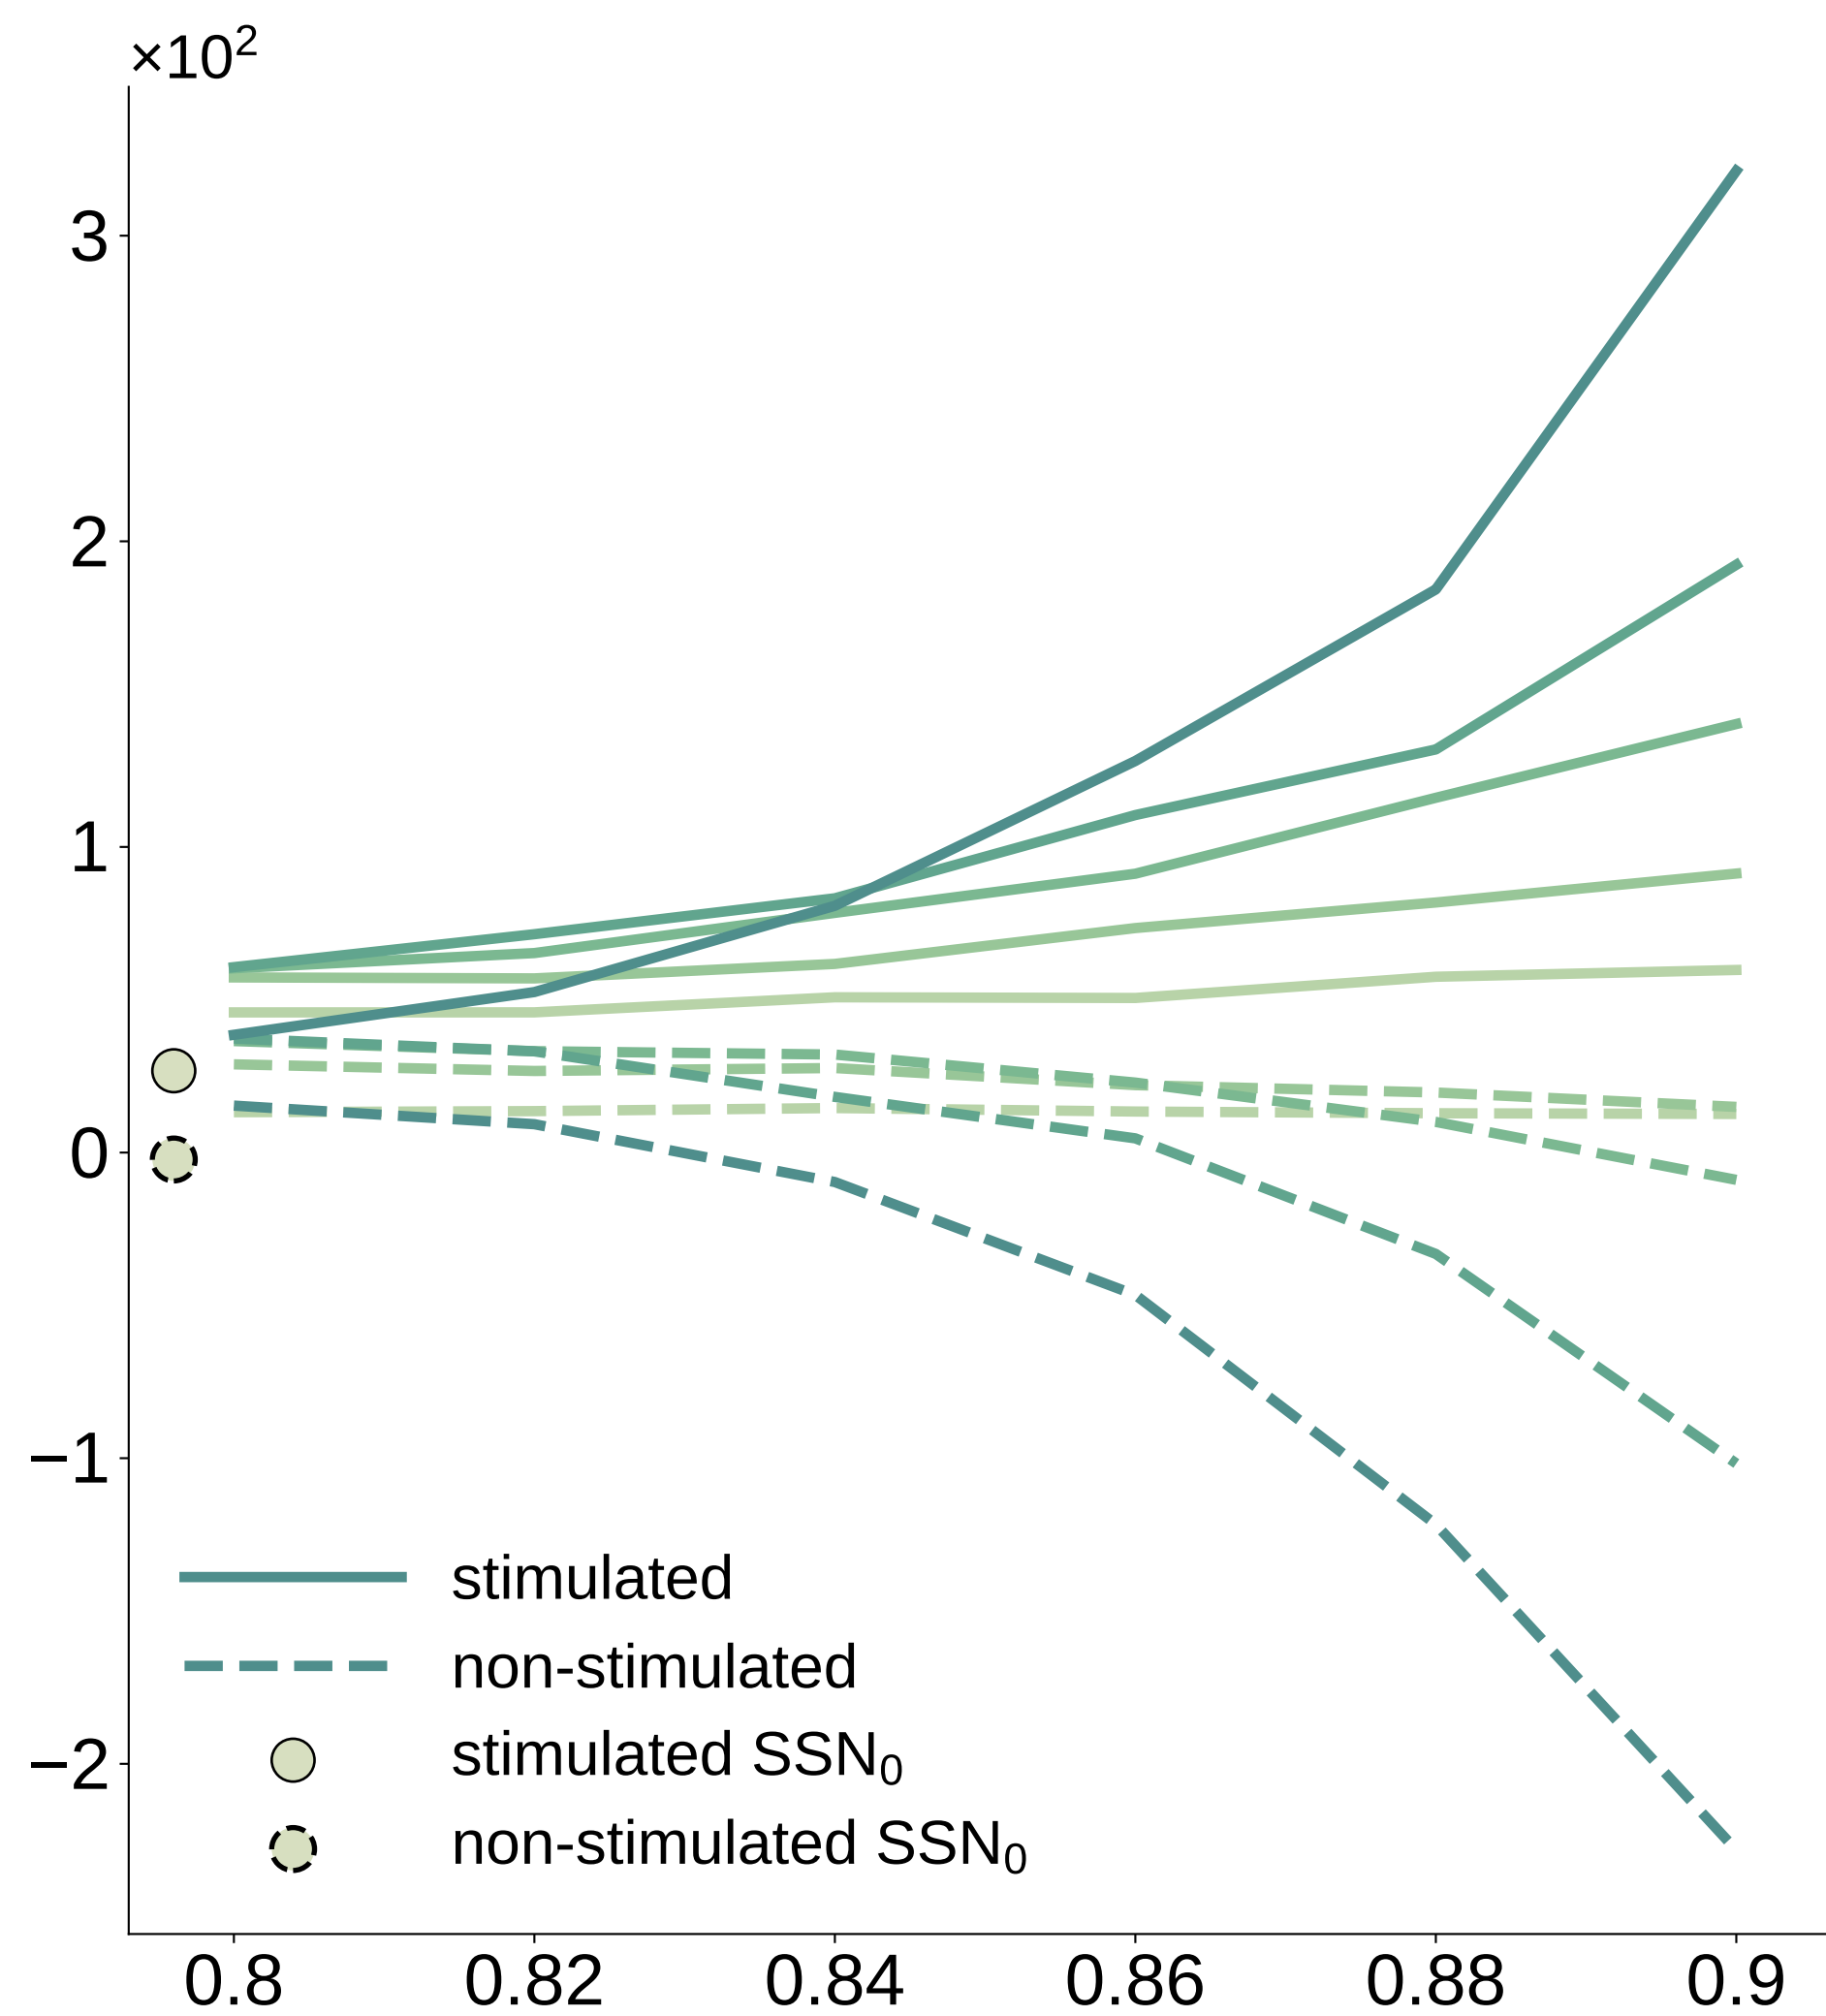

Supplement: supp [file fig3_a.pdf › figure3/plots/fig3_a.pdf]

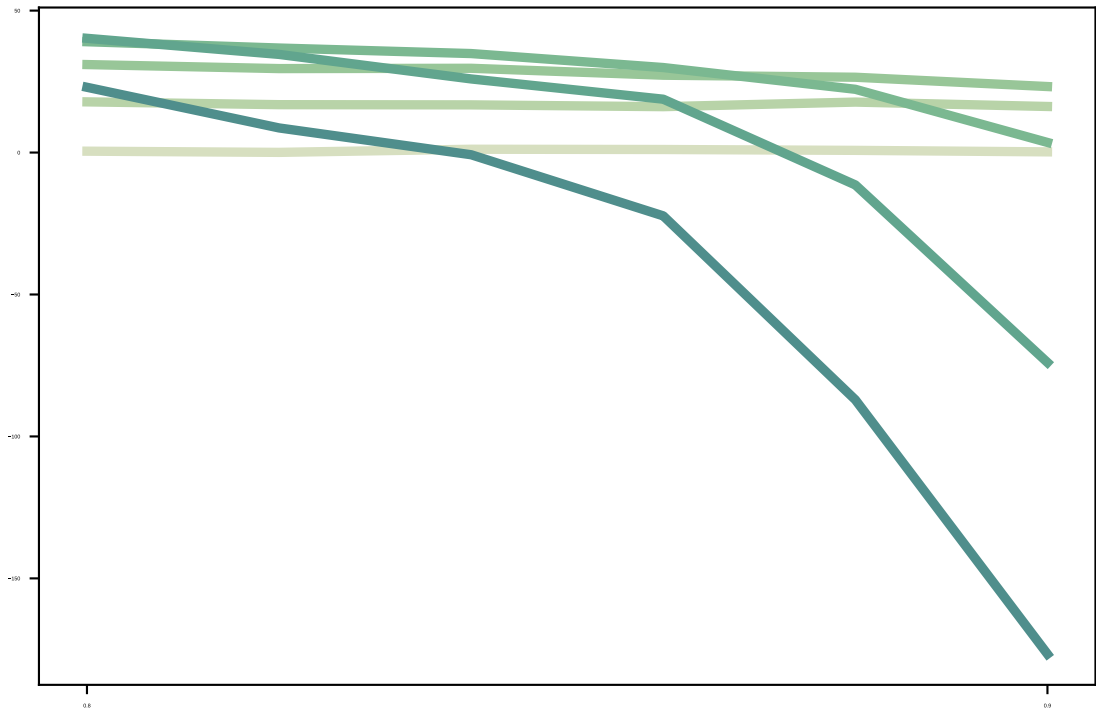

Supplement: supp [file fig3_a_inset.pdf › figure3/plots/fig3_a_inset.pdf]

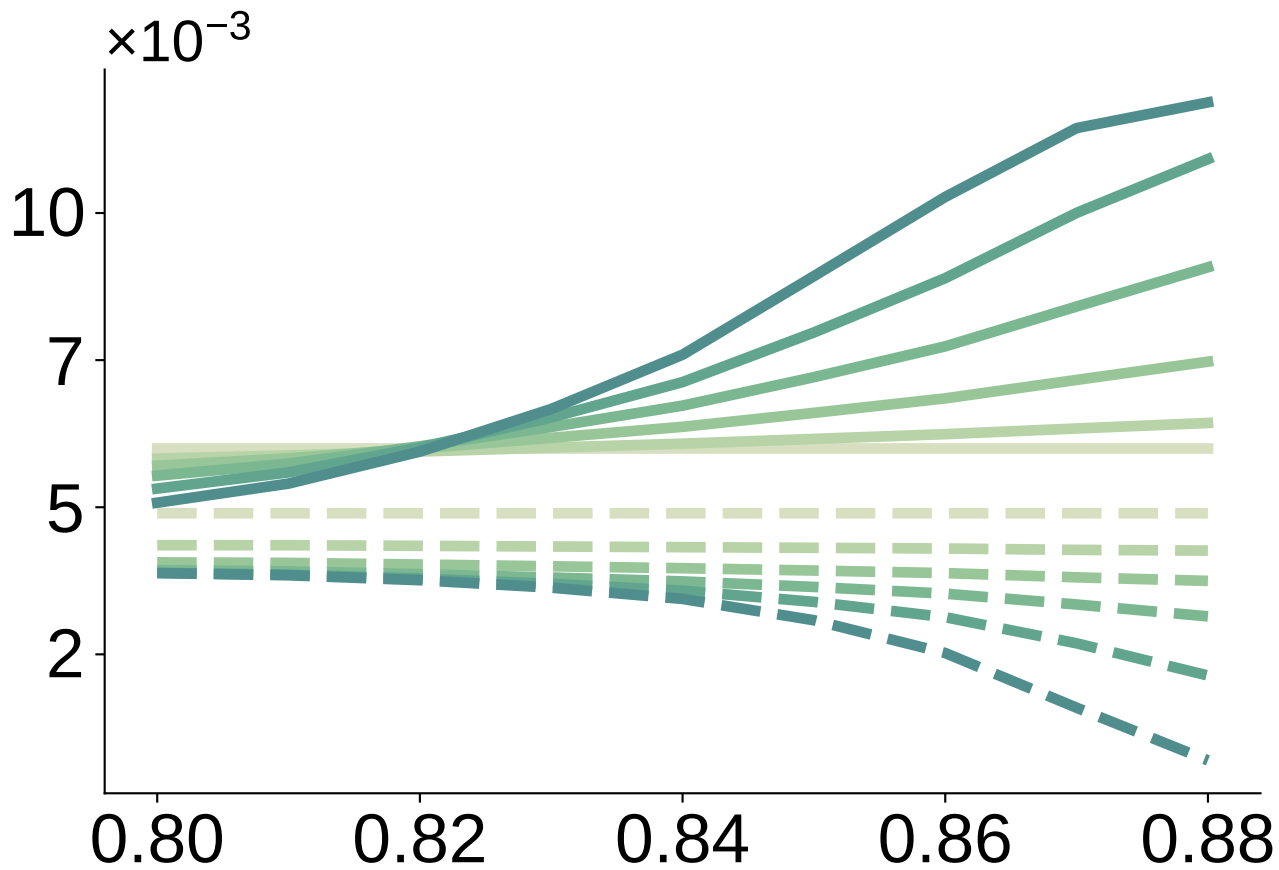

Supplement: supp [file fig3_b.pdf › figure3/plots/fig3_b.pdf]

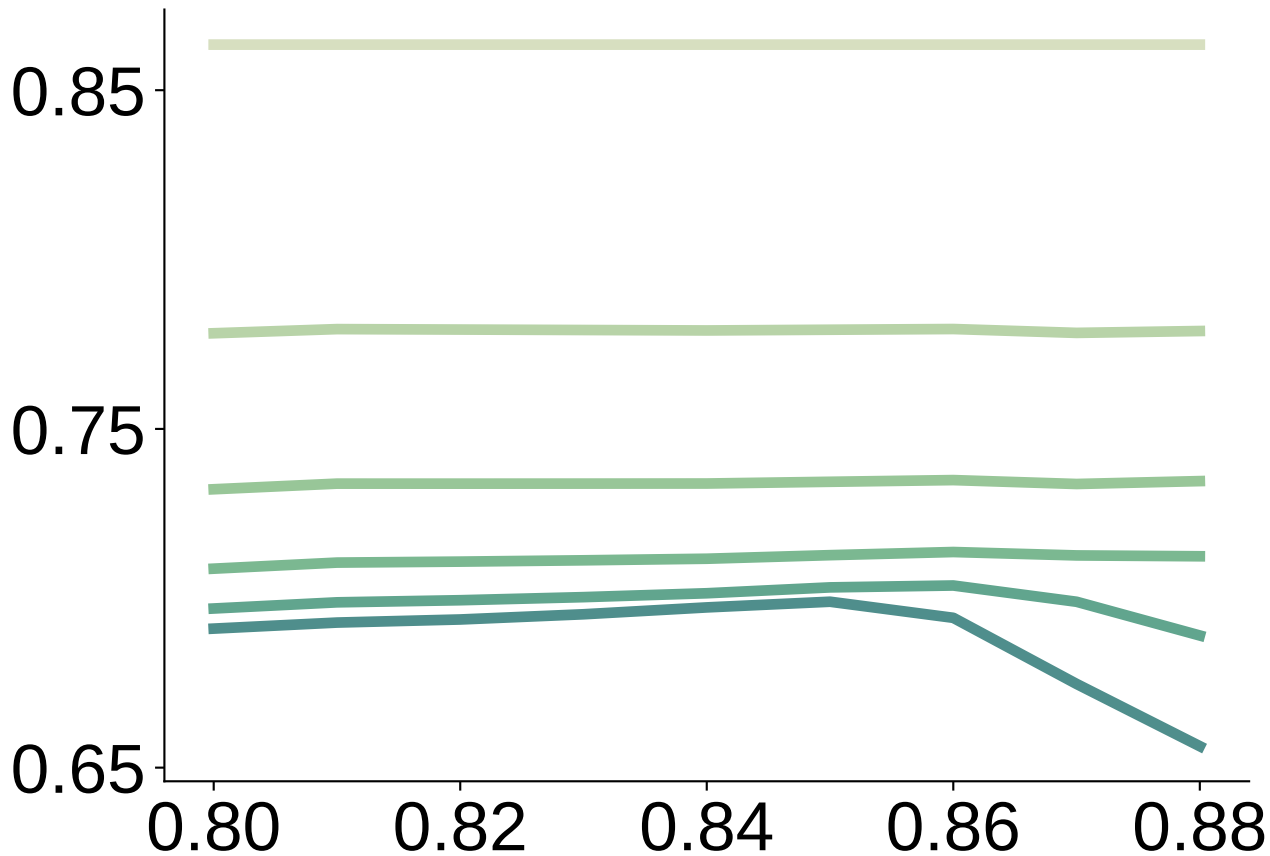

Supplement: supp [file fig3_c.pdf › figure3/plots/fig3_c.pdf]

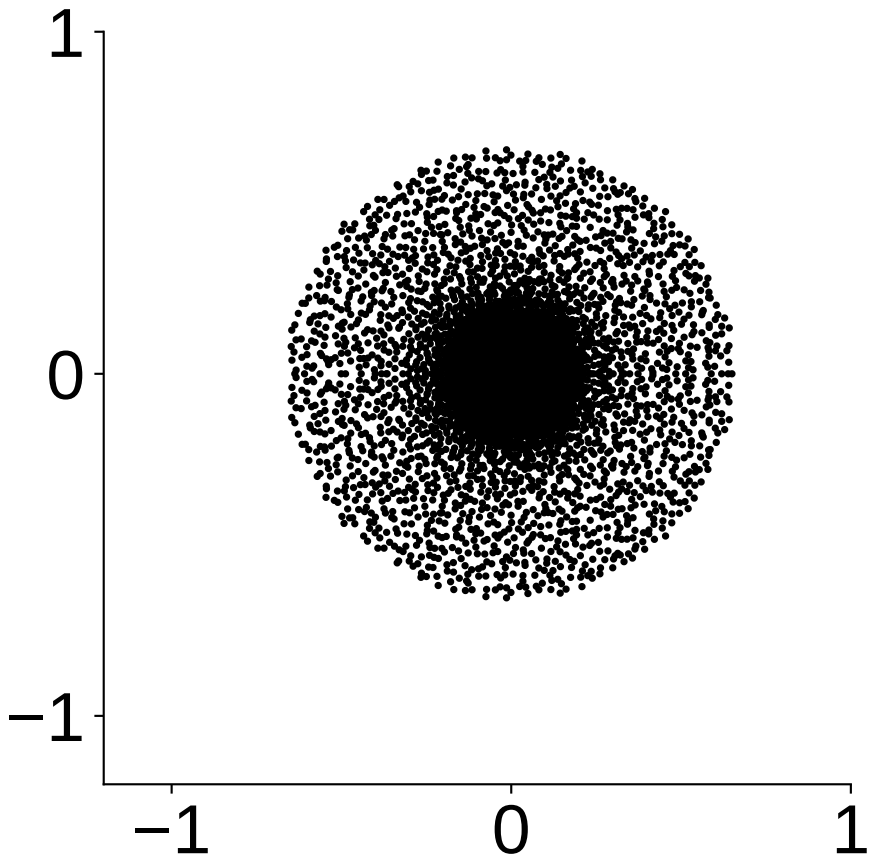

Supplement: supp [file fig3_d_m=0.8.pdf › figure3/plots/fig3_d_m=0.8.pdf]

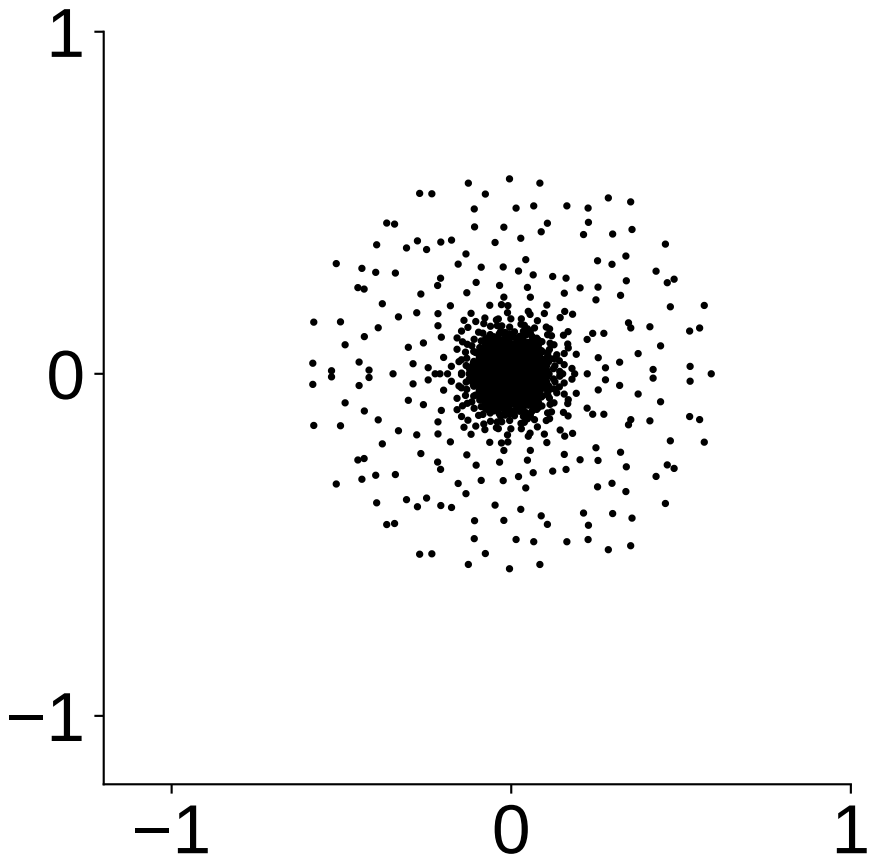

Supplement: supp [file fig3_d_m=0.9.pdf › figure3/plots/fig3_d_m=0.9.pdf]

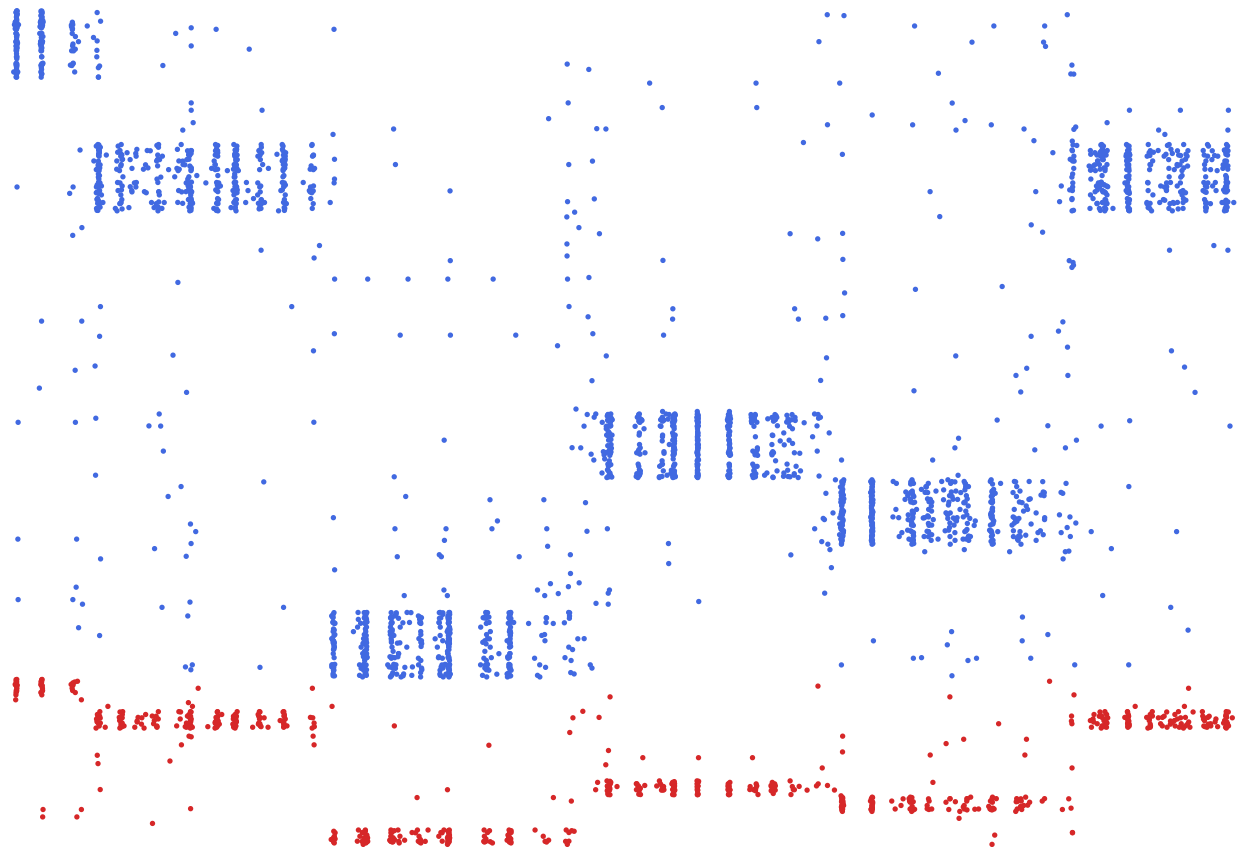

Supplement: supp [file fig4_a.pdf › figure4/plots/fig4_a.pdf]

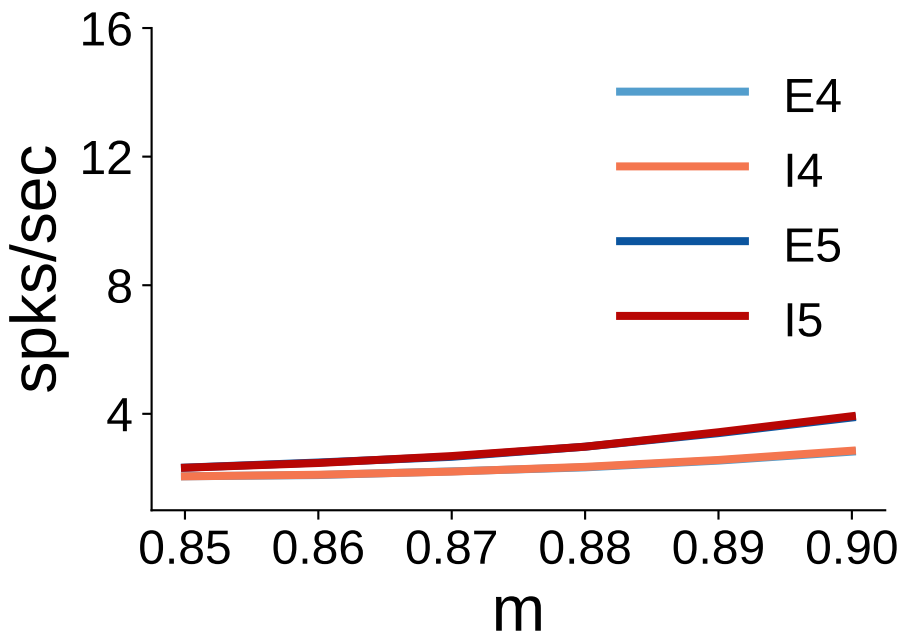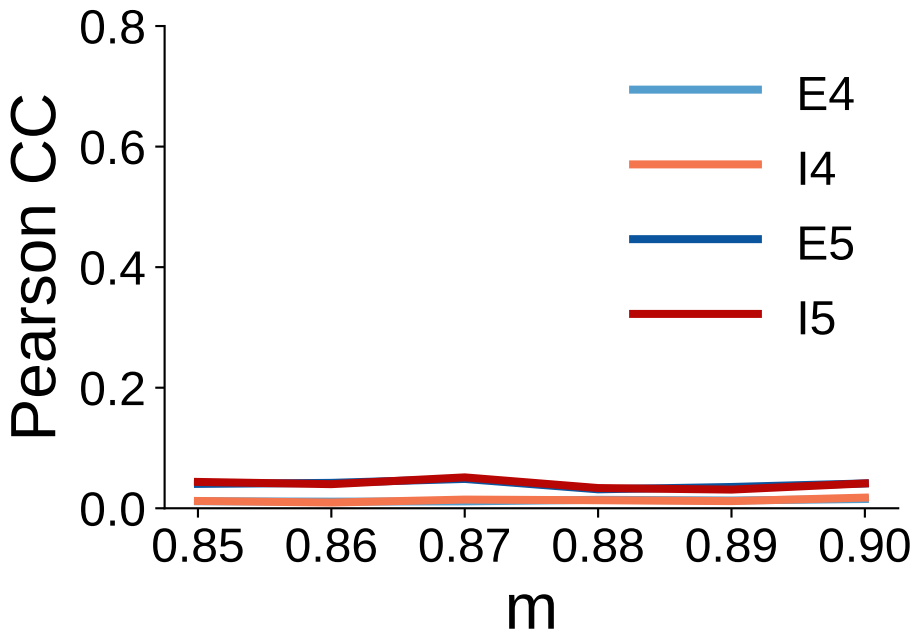

Supplement: supp [file fig4_s1_a.pdf › figure4/plots/fig4_s1_a.pdf]

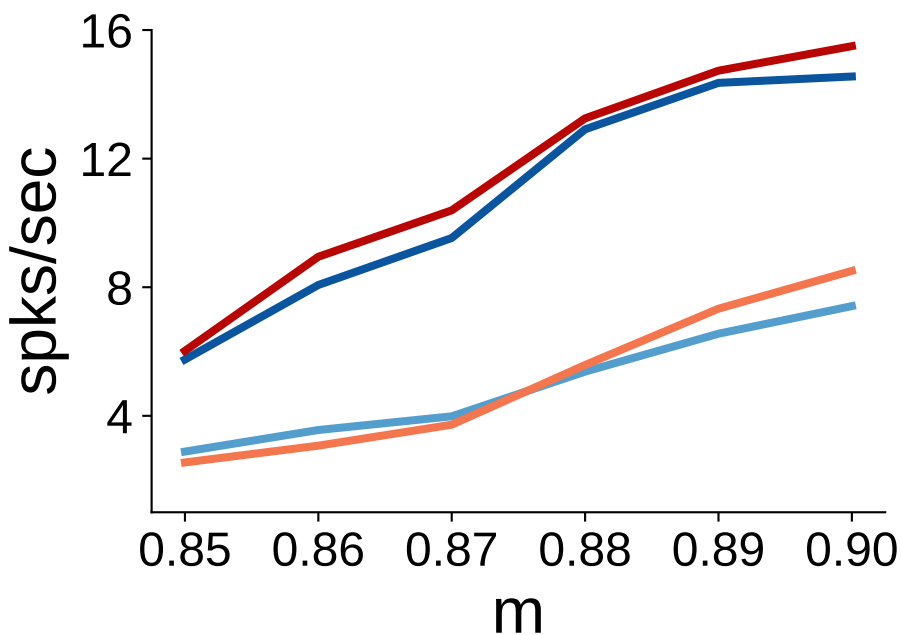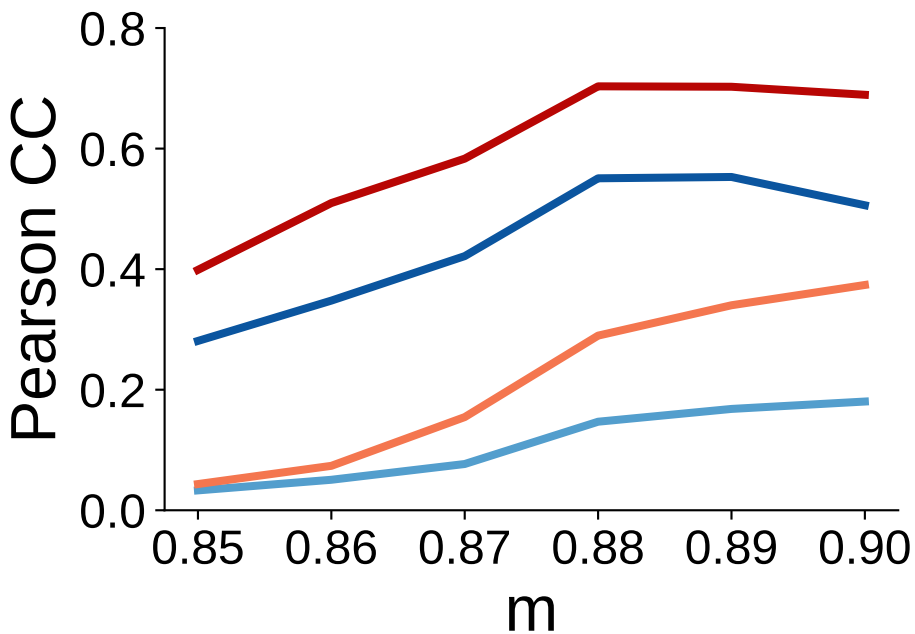

Supplement: supp [file fig4_s1_b.pdf › figure4/plots/fig4_s1_b.pdf]

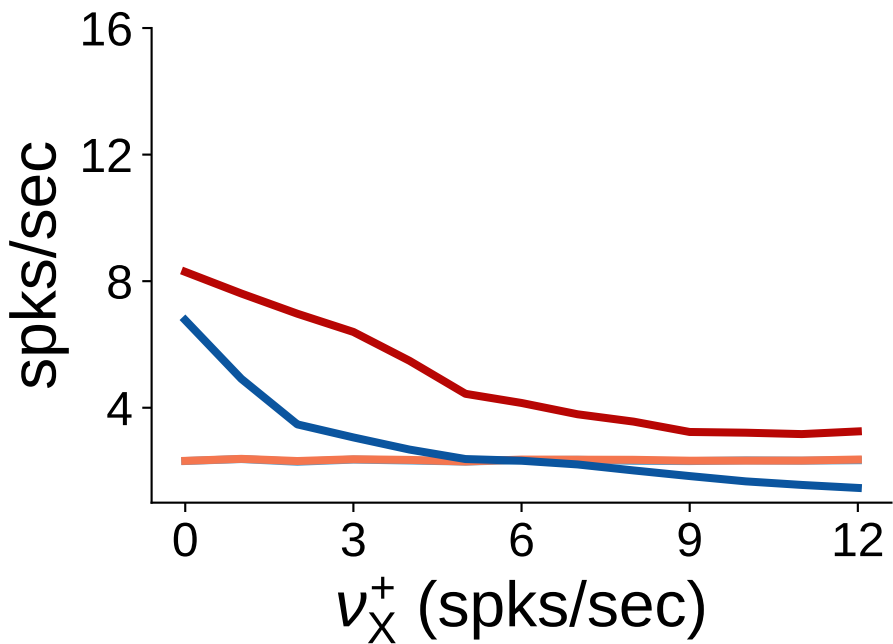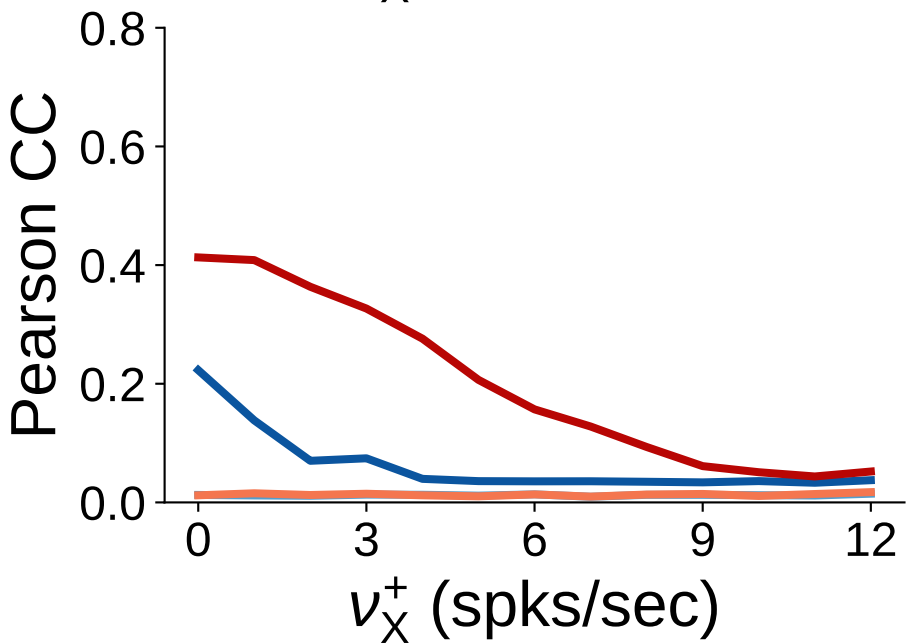

Supplement: supp [file fig4_s1_c.pdf › figure4/plots/fig4_s1_c.pdf]

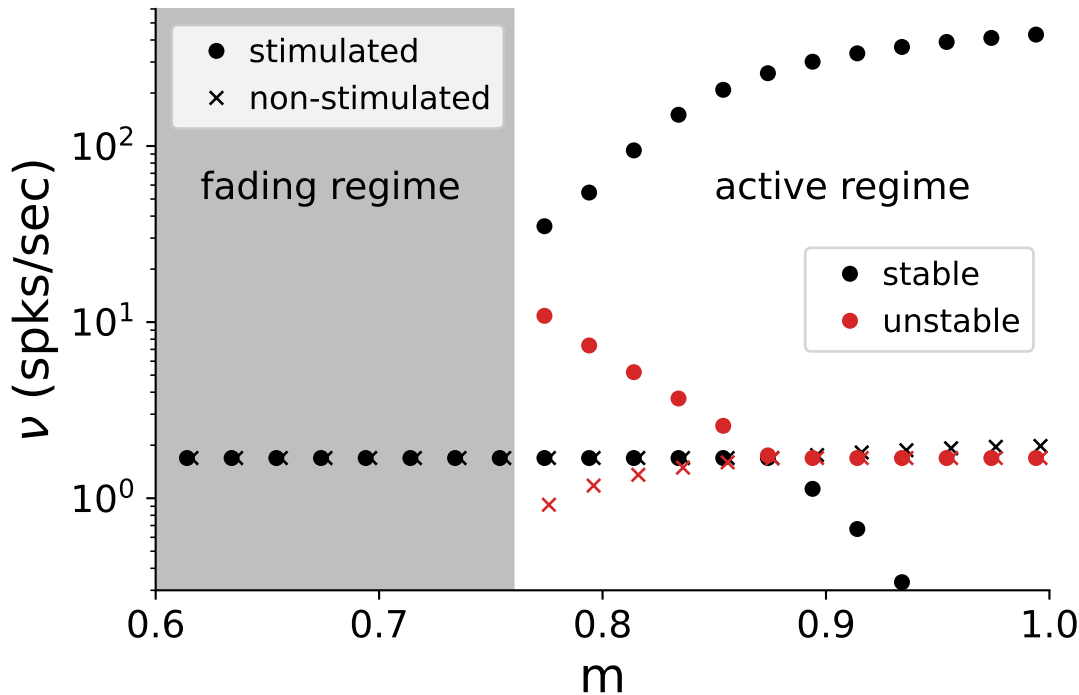

Supplement: supp [file fig7_b.pdf › figure7/plots/fig7_b.pdf]

Potential

0

50

100

150

200

250

300

$\nu^S$  (spks/sec)

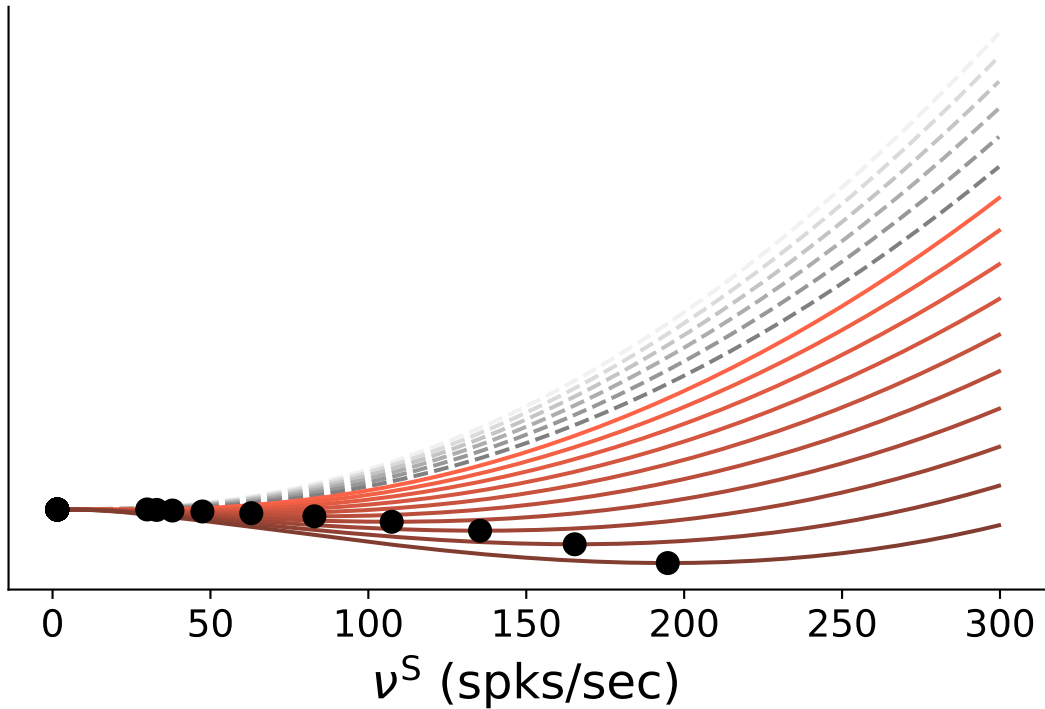

Supplement: supp [file fig7_c.pdf › figure7/plots/fig7_c.pdf]

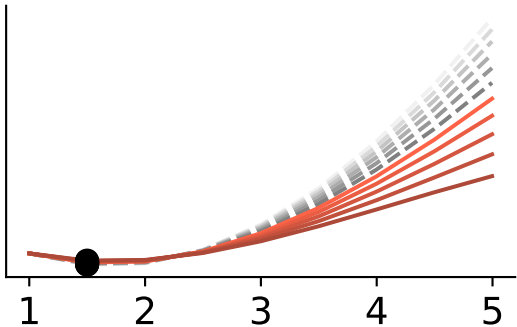

Supplement: supp [file fig7_c_zoomed.pdf › figure7/plots/fig7_c_zoomed.pdf]

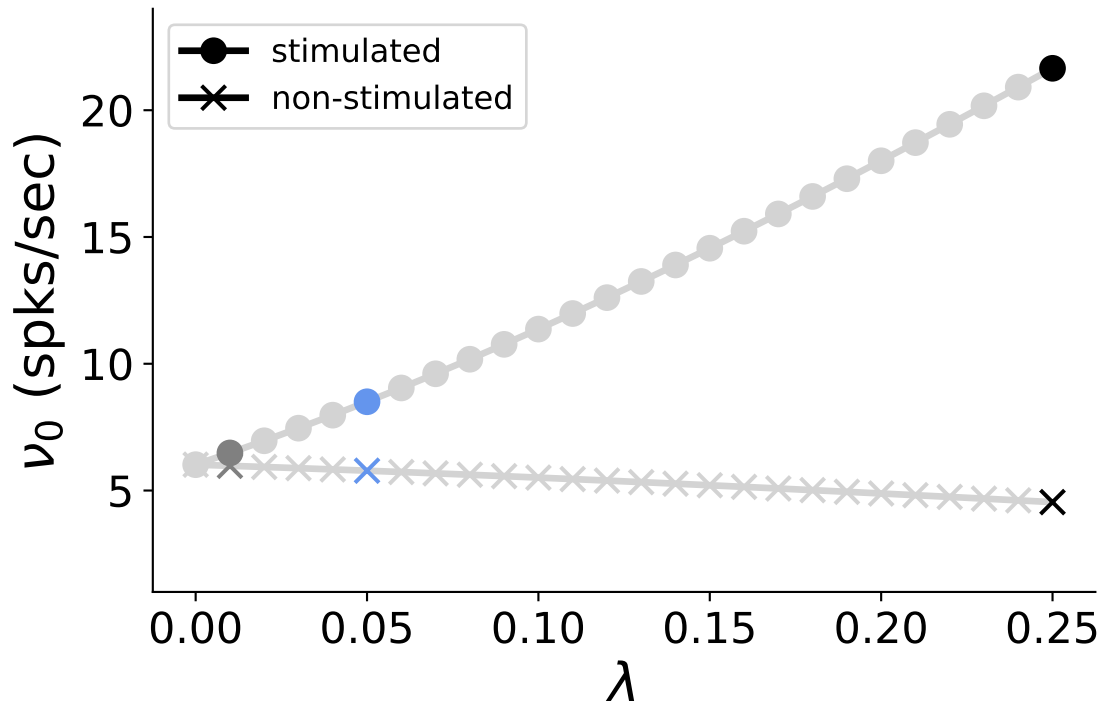

Supplement: supp [file fig7_d.pdf › figure7/plots/fig7_d.pdf]

Potential

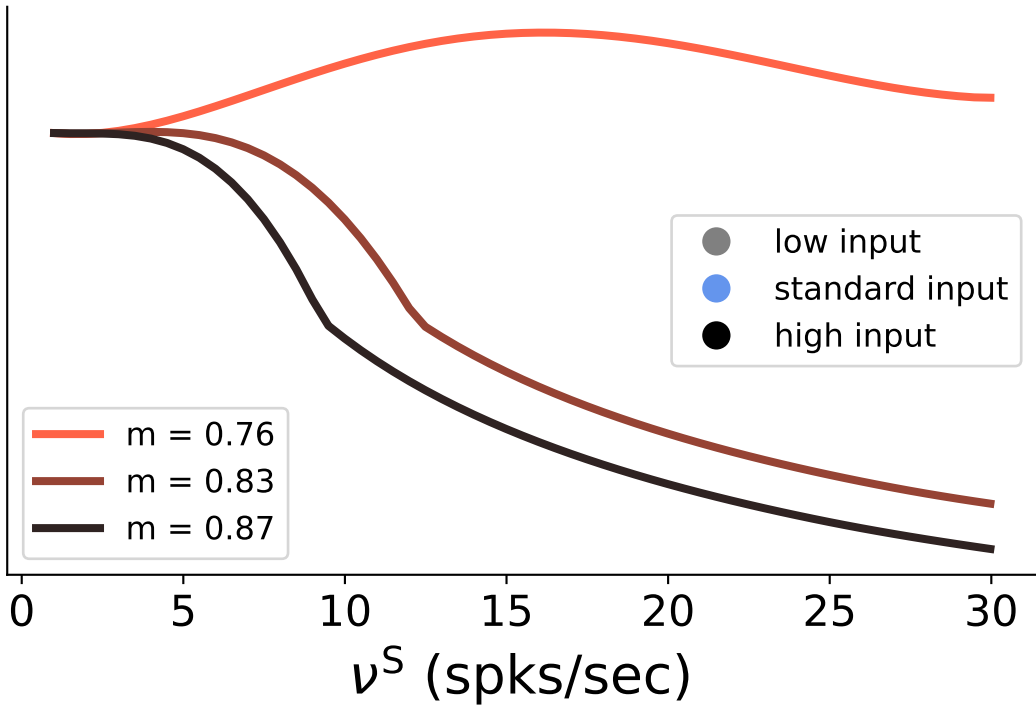

Supplement: supp [file fig7_e.pdf › figure7/plots/fig7_e.pdf]

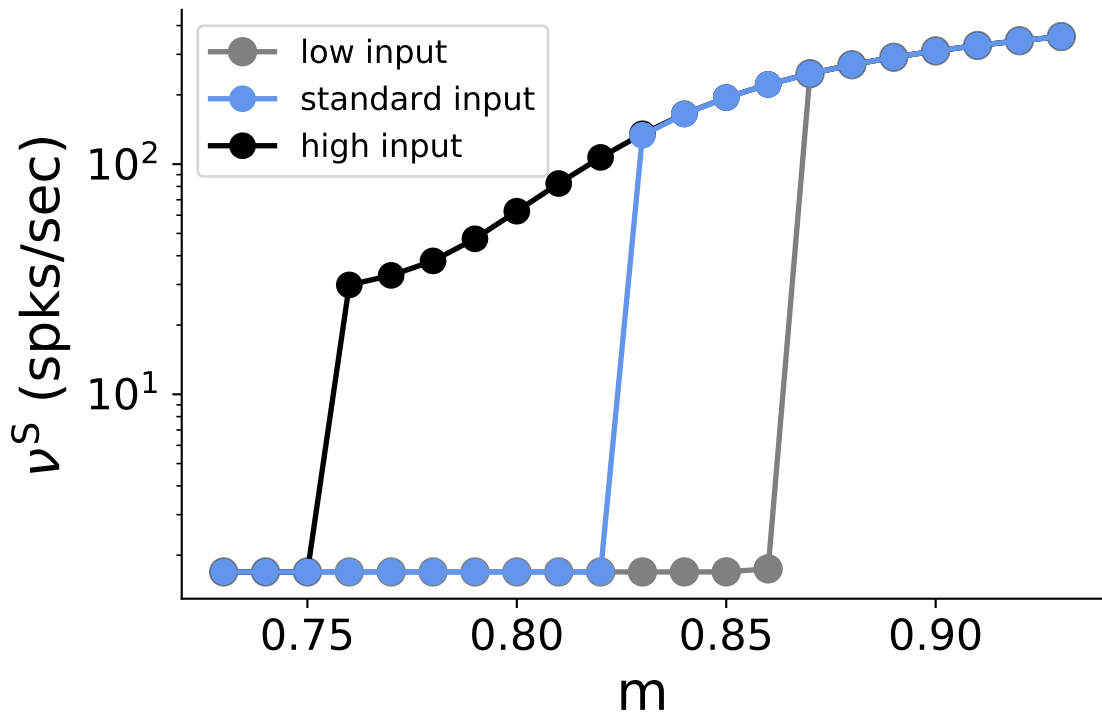

Supplement: supp [file fig7_f.pdf › figure7/plots/fig7_f.pdf]

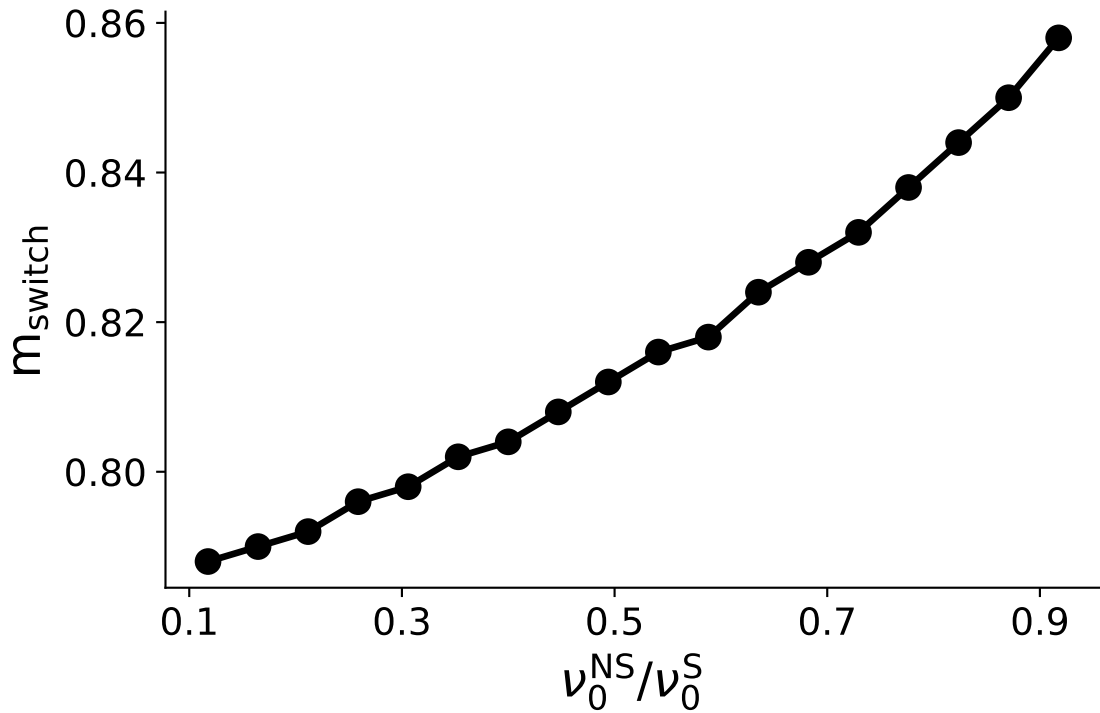

Supplement: supp [file fig7_g.pdf › figure7/plots/fig7_g.pdf]

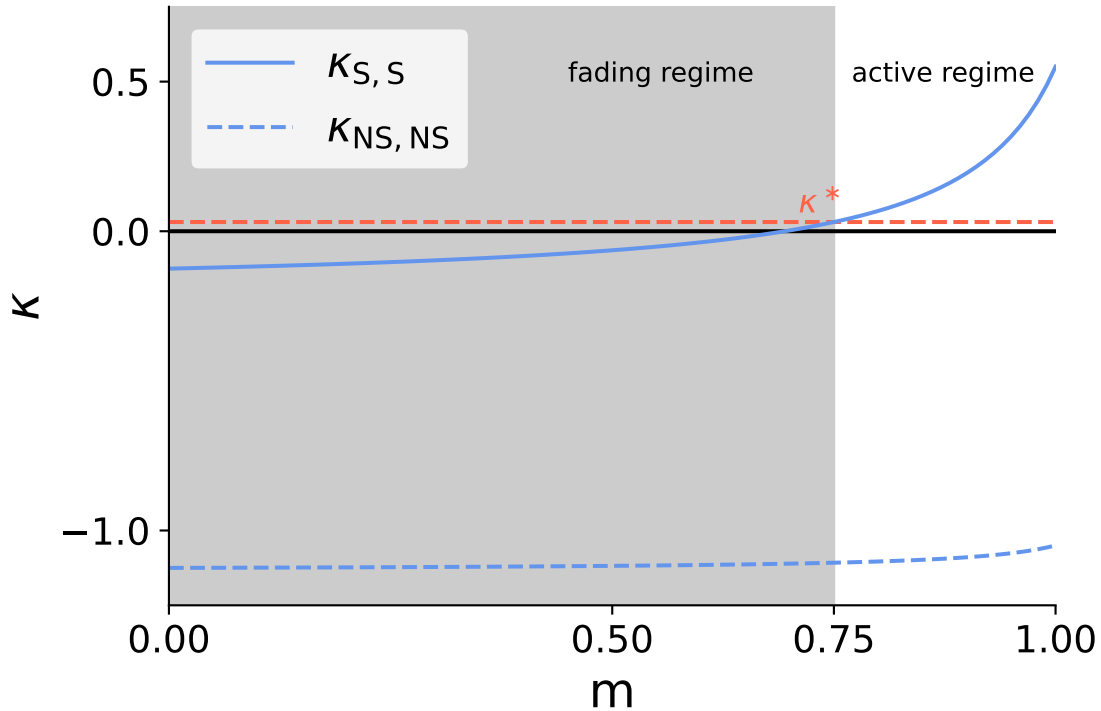

Supplement: supp [file fig7_s1_a.pdf › figure7/plots/fig7_s1_a.pdf]

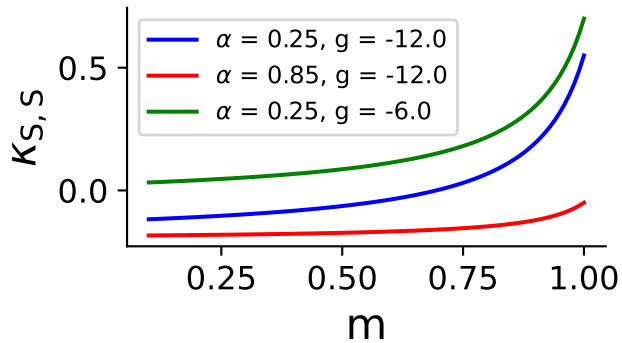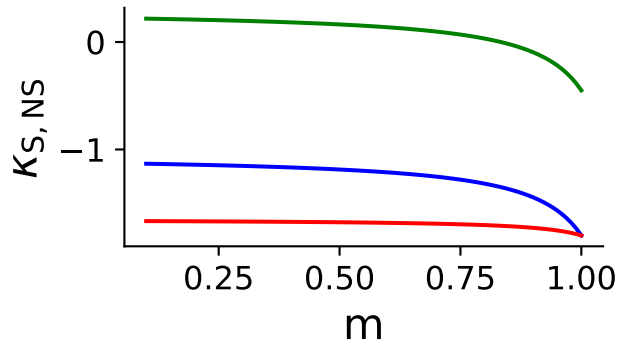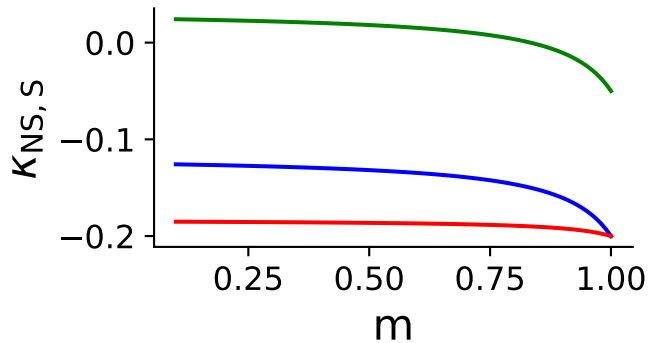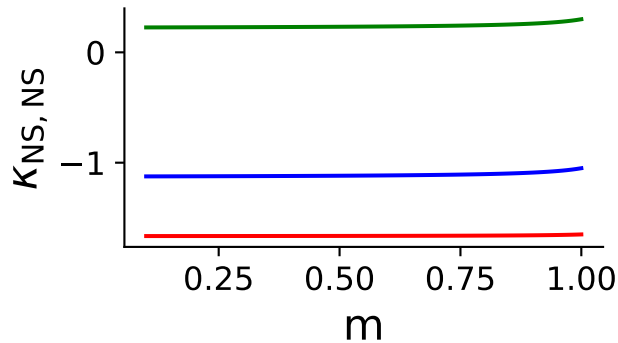

Supplement: supp [file fig7_s1_b.pdf › figure7/plots/fig7_s1_b.pdf]

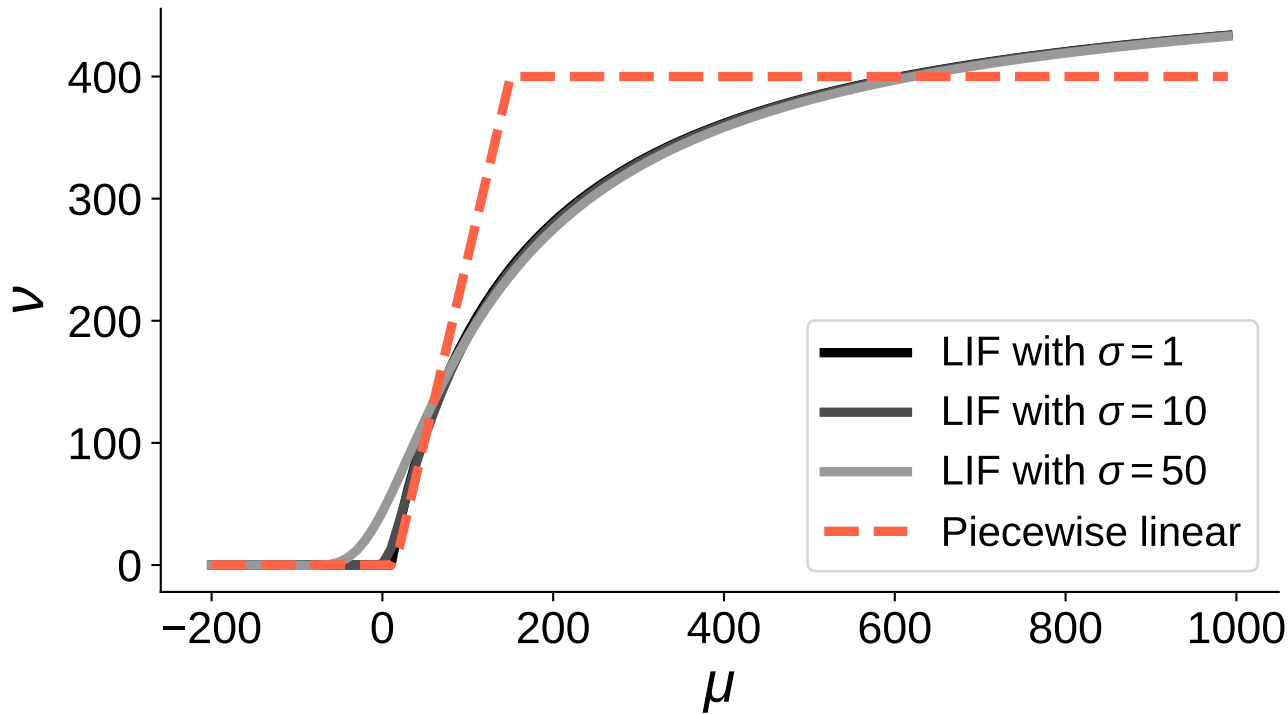

Supplement: supp [file fig8_a.pdf › figure8/plots/fig8_a.pdf]

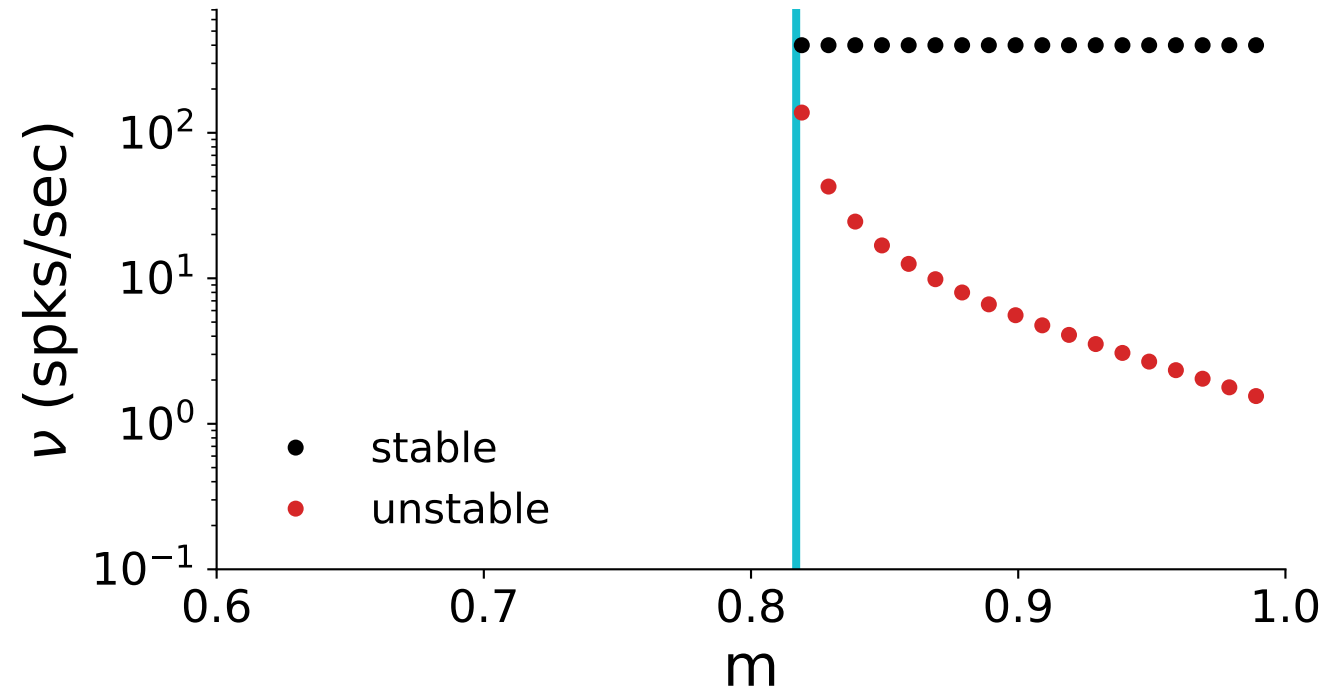

Supplement: supp [file fig8_b.pdf › figure8/plots/fig8_b.pdf]

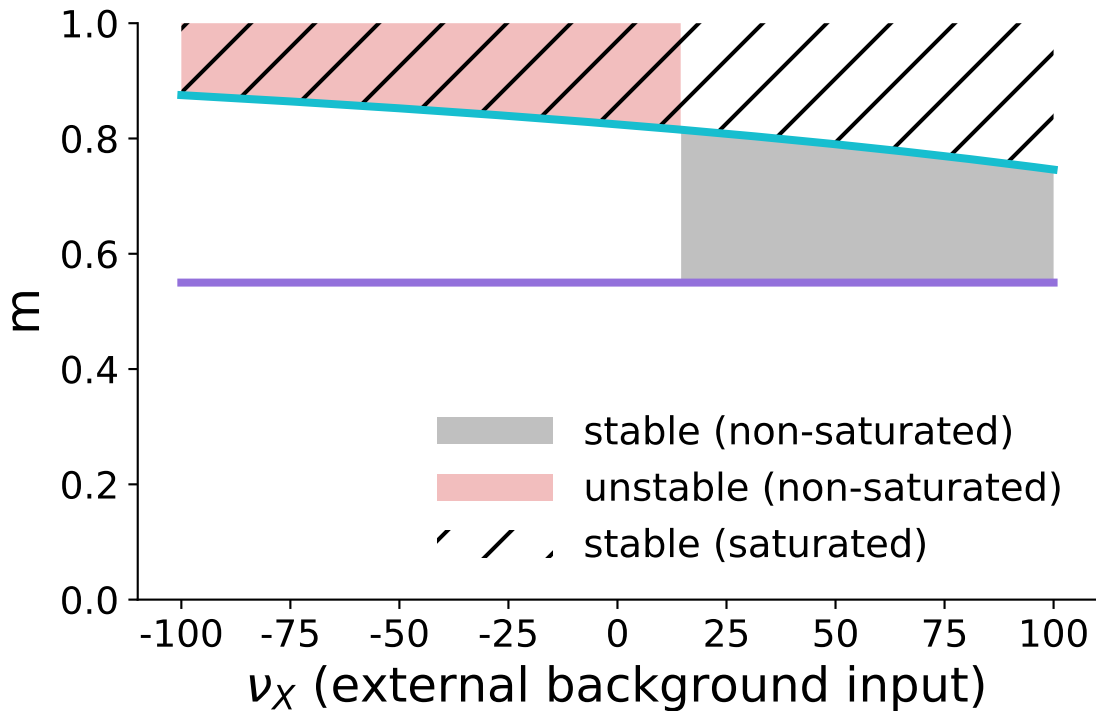

Supplement: supp [file fig8_c.pdf › figure8/plots/fig8_c.pdf]

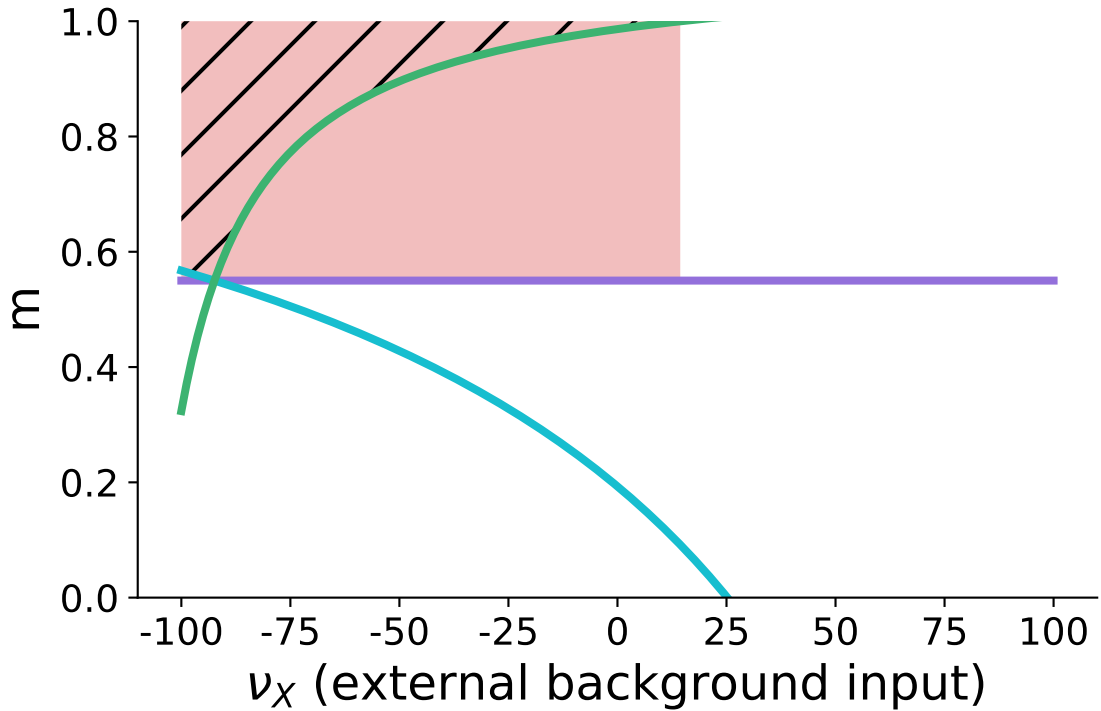

Supplement: supp [file fig8_d.pdf › figure8/plots/fig8_d.pdf]

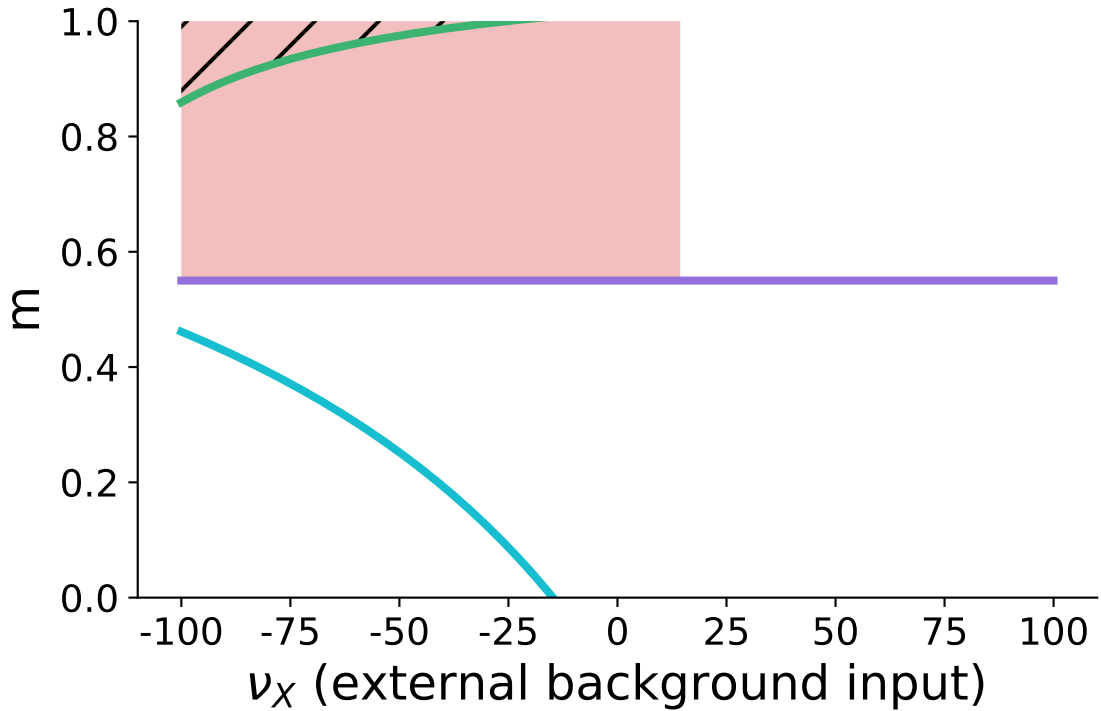

Supplement: supp [file fig8_e.pdf › figure8/plots/fig8_e.pdf]

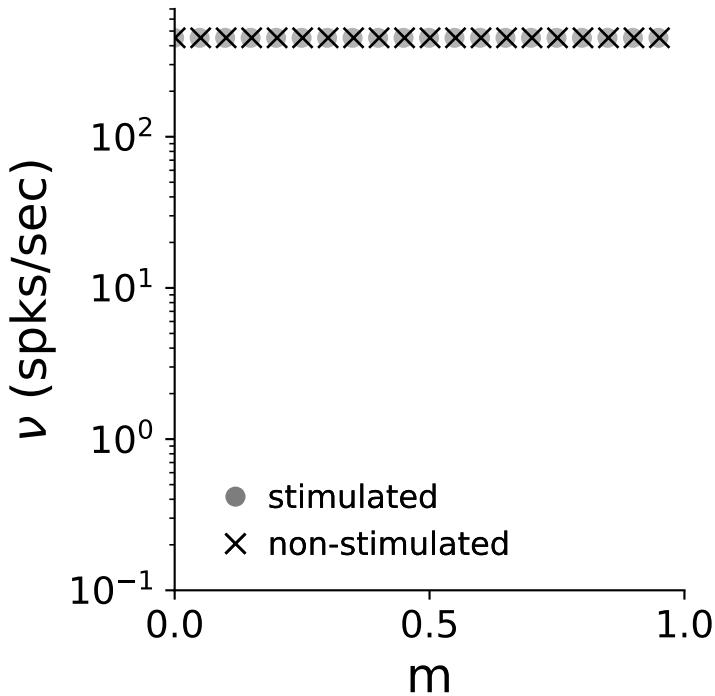

Supplement: supp [file fig8_f.pdf › figure8/plots/fig8_f.pdf]

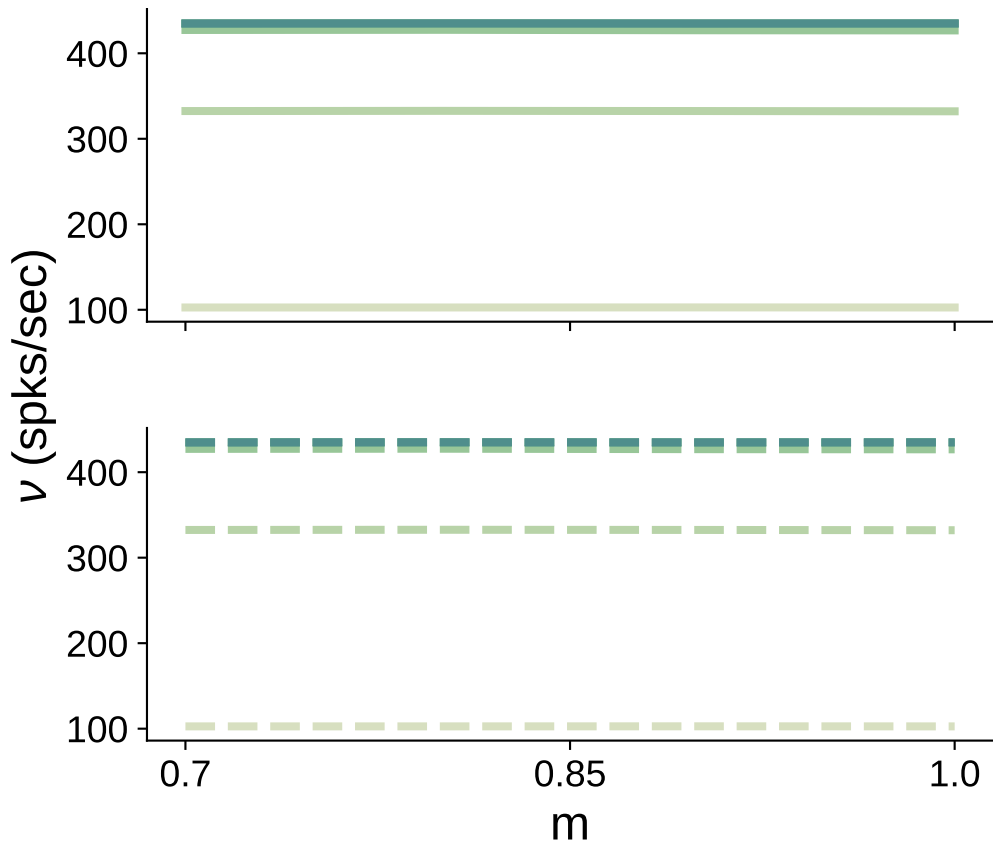

Supplement: supp [file fig8_g.pdf › figure8/plots/fig8_g.pdf]

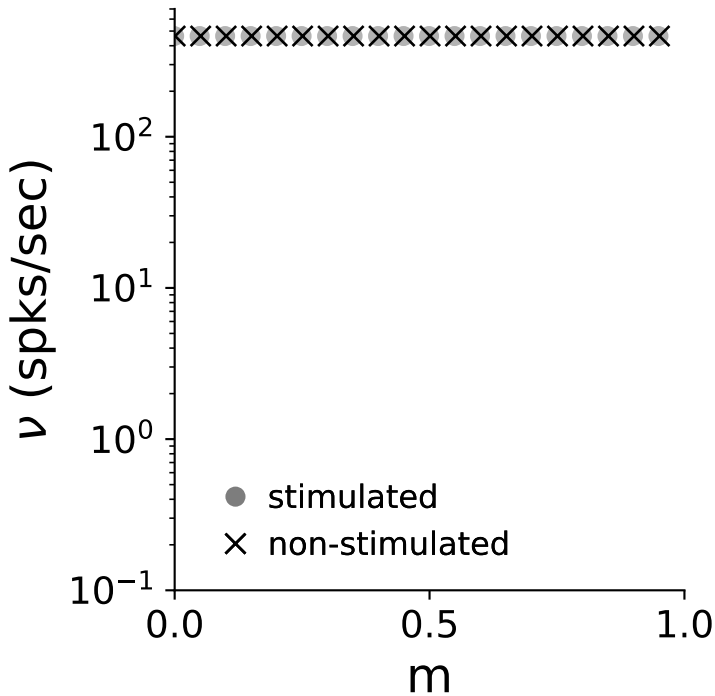

Supplement: supp [file fig8_h.pdf › figure8/plots/fig8_h.pdf]

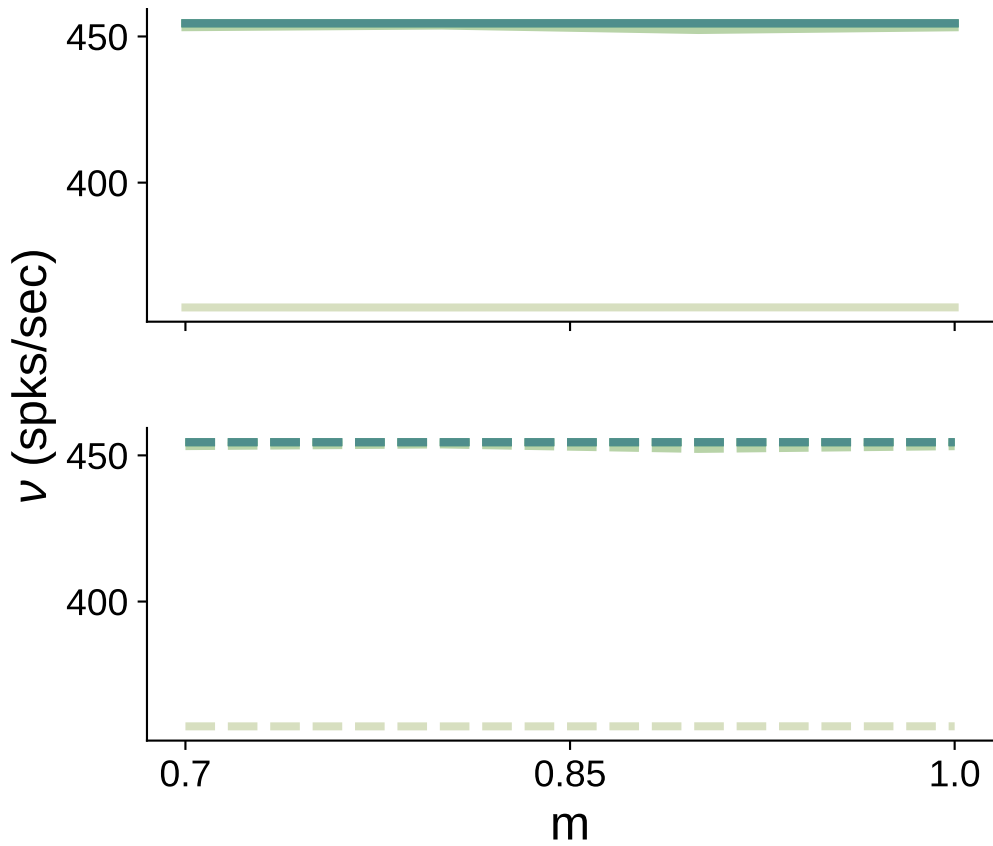

Supplement: supp [file fig8_i.pdf › figure8/plots/fig8_i.pdf]

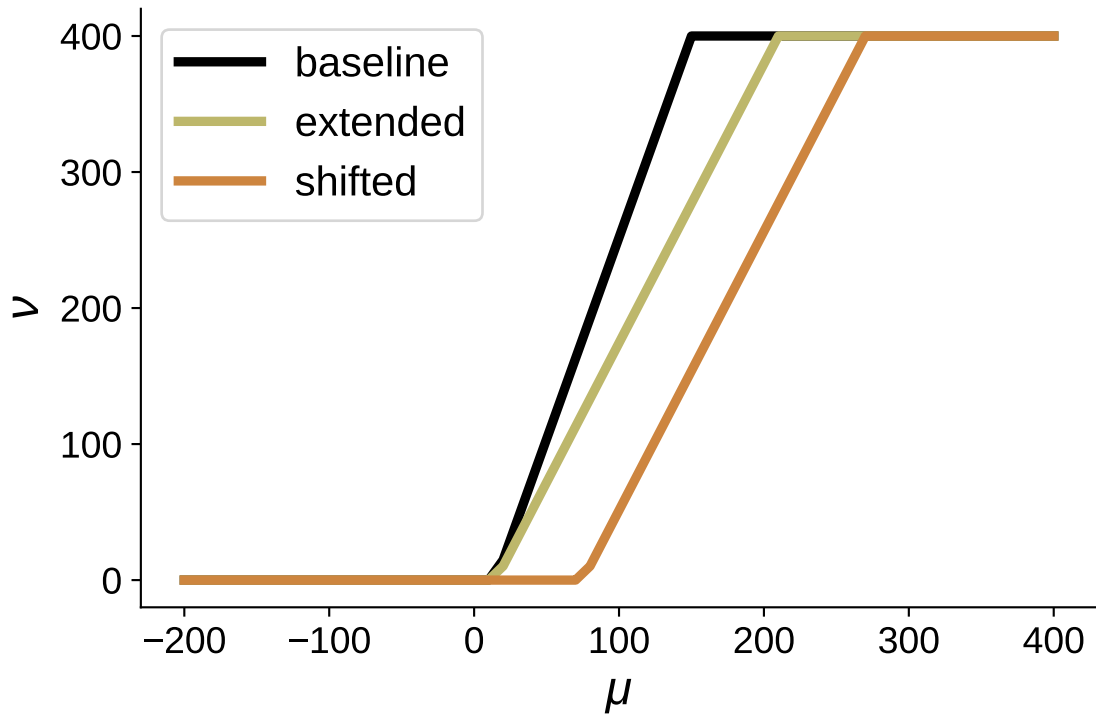

Supplement: supp [file fig8_s1_a.pdf › figure8/plots/fig8_s1_a.pdf]

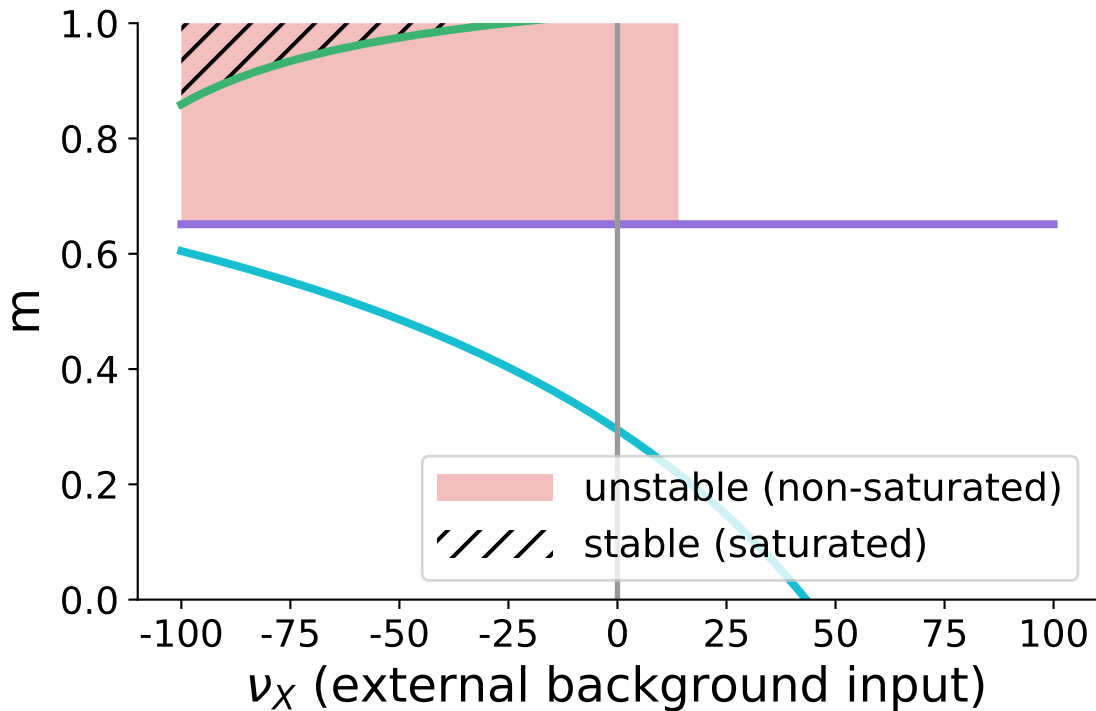

Supplement: supp [file fig8_s1_b.pdf › figure8/plots/fig8_s1_b.pdf]

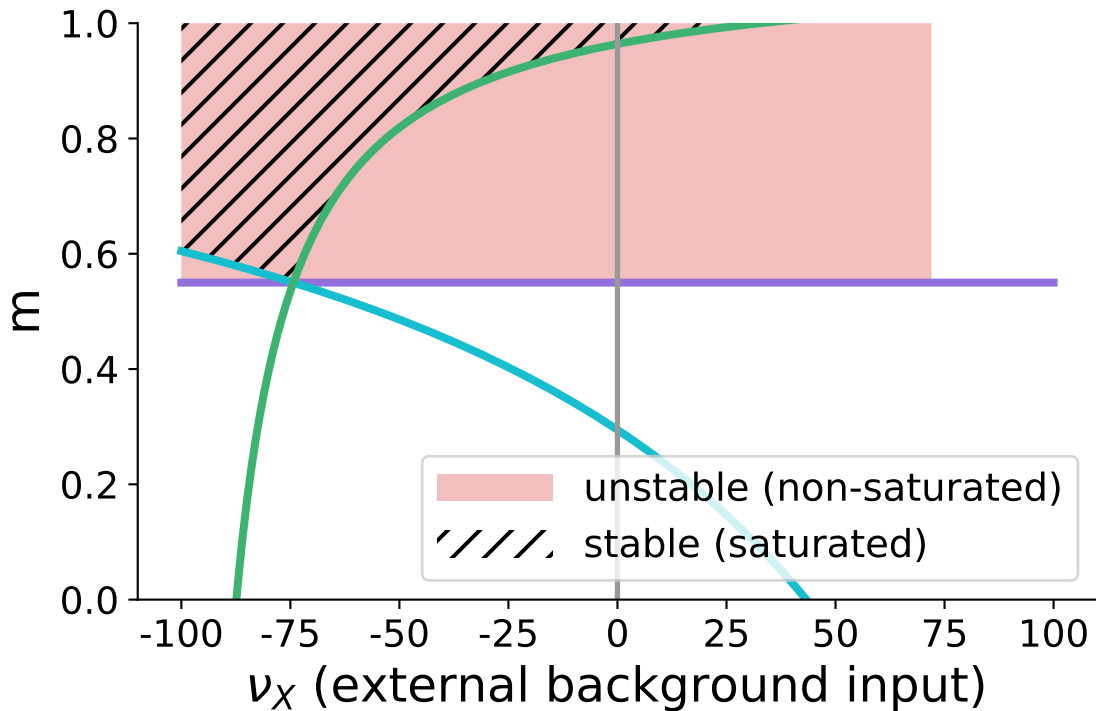

Supplement: supp [file fig8_s1_c.pdf › figure8/plots/fig8_s1_c.pdf]

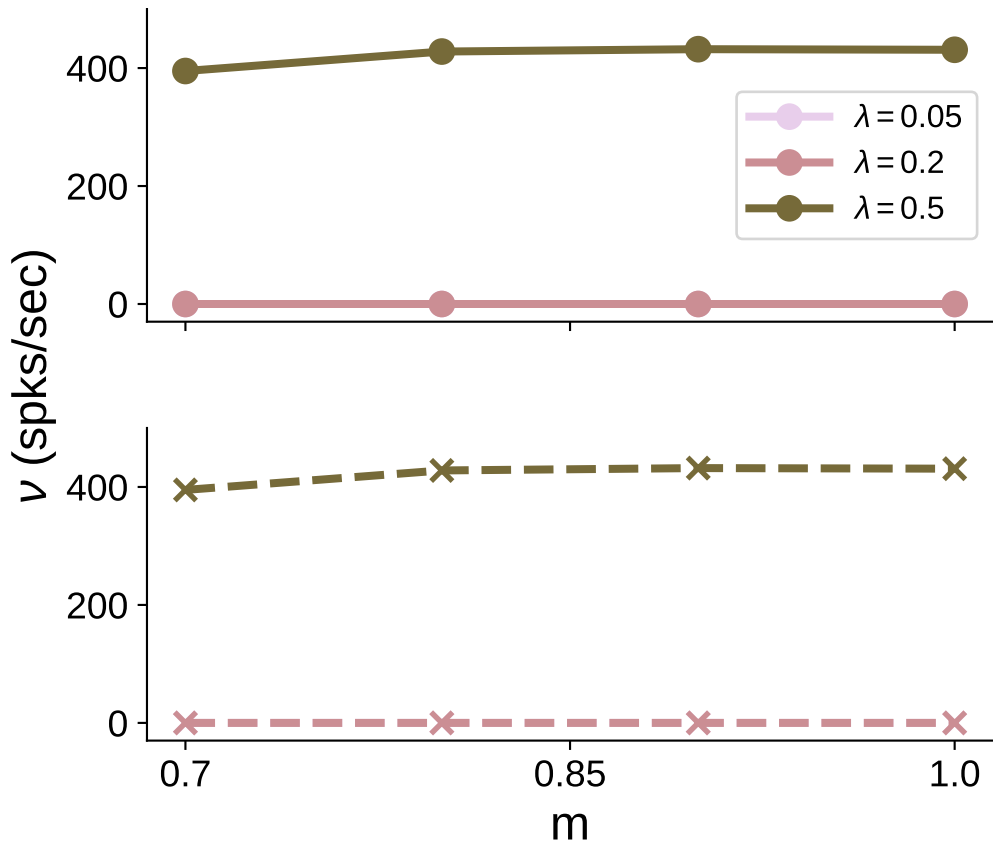

Supplement: supp [file fig8_s2_a.pdf › figure8/plots/fig8_s2_a.pdf]

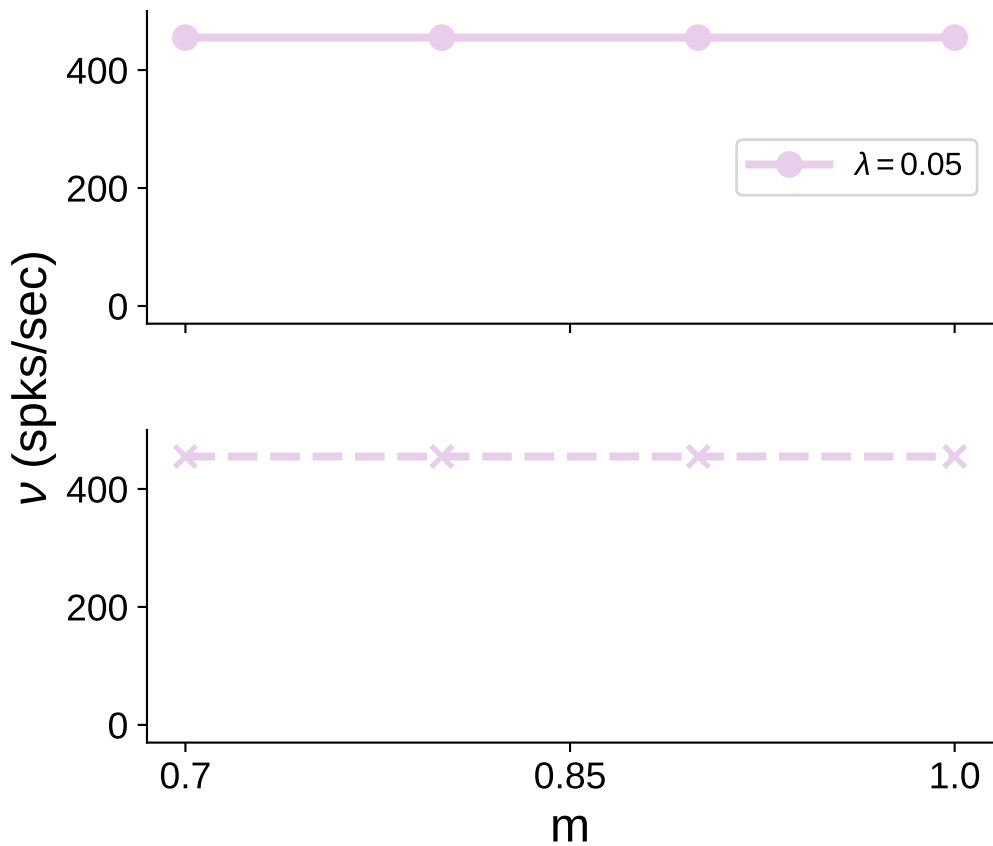

Supplement: supp [file fig8_s2_b.pdf › figure8/plots/fig8_s2_b.pdf]
